# Supplementary material for: Analysis of Multi-Layer RNA Modification Patterns for the Characterization of Tumor Immune Microenvironment in Hepatocellular Carcinoma
Source: Front Cell Dev Biol. 2021 Nov 10;9:761391. doi: 10.3389/fcell.2021.761391 (PMC8631434; doi:10.3389/fcell.2021.761391)
Supplement: Supplementary file 2 [file Table3.XLSX]

## Sheet: Table S3
Table S3 Difference of miRNAs and miRNAs-DEGs target pathways between WM Score-high and WM Score-low in TCGA COAD/READ cohort
Gene Symbol	miRNA	miRNA FC	DEG FC	Pathway	P-value
ABI2	hsa-miR-302a-3p	high_expressed_in_wm_score_high	high_expressed_in_wm_score_high	Regulation of actin cytoskeleton	0.00700649
ABI2	hsa-miR-302b-3p	high_expressed_in_wm_score_high	high_expressed_in_wm_score_high	Regulation of actin cytoskeleton	0.00700649
ABI2	hsa-miR-373-3p	high_expressed_in_wm_score_high	high_expressed_in_wm_score_high	Regulation of actin cytoskeleton	0.00700649
ABI2	hsa-miR-302c-3p.1	high_expressed_in_wm_score_high	high_expressed_in_wm_score_high	Regulation of actin cytoskeleton	0.00700649
ABI2	hsa-miR-520e	high_expressed_in_wm_score_high	high_expressed_in_wm_score_high	Regulation of actin cytoskeleton	0.00700649
ABI2	hsa-miR-520d-3p	high_expressed_in_wm_score_high	high_expressed_in_wm_score_high	Regulation of actin cytoskeleton	0.00700649
ABI2	hsa-miR-302d-3p	high_expressed_in_wm_score_high	high_expressed_in_wm_score_high	Regulation of actin cytoskeleton	0.00700649
ACVR1B	hsa-miR-371a-5p	high_expressed_in_wm_score_high	high_expressed_in_wm_score_high	Signaling pathways regulating pluripotency of stem cells	0.00108506
ACVR1C	hsa-miR-302c-3p.1	high_expressed_in_wm_score_high	low_expressed_in_wm_score_high	Signaling pathways regulating pluripotency of stem cells	0.00108506
ACVR1C	hsa-miR-520e	high_expressed_in_wm_score_high	low_expressed_in_wm_score_high	Signaling pathways regulating pluripotency of stem cells	0.00108506
ACVR1C	hsa-miR-520d-3p	high_expressed_in_wm_score_high	low_expressed_in_wm_score_high	Signaling pathways regulating pluripotency of stem cells	0.00108506
ACVR1C	hsa-miR-302a-3p	high_expressed_in_wm_score_high	low_expressed_in_wm_score_high	Signaling pathways regulating pluripotency of stem cells	0.00108506
ACVR1C	hsa-miR-302b-3p	high_expressed_in_wm_score_high	low_expressed_in_wm_score_high	Signaling pathways regulating pluripotency of stem cells	0.00108506
ACVR1C	hsa-miR-302d-3p	high_expressed_in_wm_score_high	low_expressed_in_wm_score_high	Signaling pathways regulating pluripotency of stem cells	0.00108506
ACVR1C	hsa-miR-373-3p	high_expressed_in_wm_score_high	low_expressed_in_wm_score_high	Signaling pathways regulating pluripotency of stem cells	0.00108506
AHR	hsa-miR-302d-3p	high_expressed_in_wm_score_high	low_expressed_in_wm_score_high	Cushing syndrome	0.00759012
AHR	hsa-miR-520d-3p	high_expressed_in_wm_score_high	low_expressed_in_wm_score_high	Cushing syndrome	0.00759012
AHR	hsa-miR-302c-3p.1	high_expressed_in_wm_score_high	low_expressed_in_wm_score_high	Cushing syndrome	0.00759012
AHR	hsa-miR-302b-3p	high_expressed_in_wm_score_high	low_expressed_in_wm_score_high	Cushing syndrome	0.00759012
AHR	hsa-miR-302a-3p	high_expressed_in_wm_score_high	low_expressed_in_wm_score_high	Cushing syndrome	0.00759012
AHR	hsa-miR-520e	high_expressed_in_wm_score_high	low_expressed_in_wm_score_high	Cushing syndrome	0.00759012
AHR	hsa-miR-373-3p	high_expressed_in_wm_score_high	low_expressed_in_wm_score_high	Cushing syndrome	0.00759012
AJUBA	hsa-miR-302d-3p	high_expressed_in_wm_score_high	high_expressed_in_wm_score_high	Hippo signaling pathway	0.00273368
AJUBA	hsa-miR-520e	high_expressed_in_wm_score_high	high_expressed_in_wm_score_high	Hippo signaling pathway	0.00273368
AJUBA	hsa-miR-520d-3p	high_expressed_in_wm_score_high	high_expressed_in_wm_score_high	Hippo signaling pathway	0.00273368
AJUBA	hsa-miR-302a-3p	high_expressed_in_wm_score_high	high_expressed_in_wm_score_high	Hippo signaling pathway	0.00273368
AJUBA	hsa-miR-302c-3p.1	high_expressed_in_wm_score_high	high_expressed_in_wm_score_high	Hippo signaling pathway	0.00273368
AJUBA	hsa-miR-373-3p	high_expressed_in_wm_score_high	high_expressed_in_wm_score_high	Hippo signaling pathway	0.00273368
AJUBA	hsa-miR-302b-3p	high_expressed_in_wm_score_high	high_expressed_in_wm_score_high	Hippo signaling pathway	0.00273368
AKT1	hsa-miR-302a-3p	high_expressed_in_wm_score_high	low_expressed_in_wm_score_high	Human T-cell leukemia virus 1 infection	0.0175415
AKT1	hsa-miR-302b-3p	high_expressed_in_wm_score_high	low_expressed_in_wm_score_high	Human T-cell leukemia virus 1 infection	0.0175415
AKT1	hsa-miR-302c-3p.1	high_expressed_in_wm_score_high	low_expressed_in_wm_score_high	Human T-cell leukemia virus 1 infection	0.0175415
AKT1	hsa-miR-302d-3p	high_expressed_in_wm_score_high	low_expressed_in_wm_score_high	Human T-cell leukemia virus 1 infection	0.0175415
AKT1	hsa-miR-520d-3p	high_expressed_in_wm_score_high	low_expressed_in_wm_score_high	Human T-cell leukemia virus 1 infection	0.0175415
AKT1	hsa-miR-373-3p	high_expressed_in_wm_score_high	low_expressed_in_wm_score_high	Human T-cell leukemia virus 1 infection	0.0175415
AKT1	hsa-miR-520e	high_expressed_in_wm_score_high	low_expressed_in_wm_score_high	Human T-cell leukemia virus 1 infection	0.0175415
APC	hsa-miR-302a-3p	high_expressed_in_wm_score_high	low_expressed_in_wm_score_high	Basal cell carcinoma	0.0392676
APC	hsa-miR-302b-3p	high_expressed_in_wm_score_high	low_expressed_in_wm_score_high	Basal cell carcinoma	0.0392676
APC	hsa-miR-302c-3p.1	high_expressed_in_wm_score_high	low_expressed_in_wm_score_high	Basal cell carcinoma	0.0392676
APC	hsa-miR-302d-3p	high_expressed_in_wm_score_high	low_expressed_in_wm_score_high	Basal cell carcinoma	0.0392676
APC	hsa-miR-373-3p	high_expressed_in_wm_score_high	low_expressed_in_wm_score_high	Basal cell carcinoma	0.0392676
APC	hsa-miR-520e	high_expressed_in_wm_score_high	low_expressed_in_wm_score_high	Basal cell carcinoma	0.0392676
APC	hsa-miR-520d-3p	high_expressed_in_wm_score_high	low_expressed_in_wm_score_high	Basal cell carcinoma	0.0392676
ARHGEF7	hsa-miR-302c-3p.1	high_expressed_in_wm_score_high	low_expressed_in_wm_score_high	Regulation of actin cytoskeleton	0.00700649
ARHGEF7	hsa-miR-302a-3p	high_expressed_in_wm_score_high	low_expressed_in_wm_score_high	Regulation of actin cytoskeleton	0.00700649
ARHGEF7	hsa-miR-520e	high_expressed_in_wm_score_high	low_expressed_in_wm_score_high	Regulation of actin cytoskeleton	0.00700649
ARHGEF7	hsa-miR-520d-3p	high_expressed_in_wm_score_high	low_expressed_in_wm_score_high	Regulation of actin cytoskeleton	0.00700649
ARHGEF7	hsa-miR-302b-3p	high_expressed_in_wm_score_high	low_expressed_in_wm_score_high	Regulation of actin cytoskeleton	0.00700649
ARHGEF7	hsa-miR-373-3p	high_expressed_in_wm_score_high	low_expressed_in_wm_score_high	Regulation of actin cytoskeleton	0.00700649
ARHGEF7	hsa-miR-302d-3p	high_expressed_in_wm_score_high	low_expressed_in_wm_score_high	Regulation of actin cytoskeleton	0.00700649
ATF6B	hsa-miR-302d-3p	high_expressed_in_wm_score_high	high_expressed_in_wm_score_high	Human T-cell leukemia virus 1 infection	0.0175415
ATF6B	hsa-miR-373-3p	high_expressed_in_wm_score_high	high_expressed_in_wm_score_high	Human T-cell leukemia virus 1 infection	0.0175415
ATF6B	hsa-miR-520d-3p	high_expressed_in_wm_score_high	high_expressed_in_wm_score_high	Human T-cell leukemia virus 1 infection	0.0175415
ATF6B	hsa-miR-520e	high_expressed_in_wm_score_high	high_expressed_in_wm_score_high	Human T-cell leukemia virus 1 infection	0.0175415
ATF6B	hsa-miR-302c-3p.1	high_expressed_in_wm_score_high	high_expressed_in_wm_score_high	Human T-cell leukemia virus 1 infection	0.0175415
ATF6B	hsa-miR-302b-3p	high_expressed_in_wm_score_high	high_expressed_in_wm_score_high	Human T-cell leukemia virus 1 infection	0.0175415
ATF6B	hsa-miR-302a-3p	high_expressed_in_wm_score_high	high_expressed_in_wm_score_high	Human T-cell leukemia virus 1 infection	0.0175415
ATG13	hsa-miR-371a-5p	high_expressed_in_wm_score_high	low_expressed_in_wm_score_high	Autophagy - animal	0.00122306
ATG14	hsa-miR-371a-5p	high_expressed_in_wm_score_high	high_expressed_in_wm_score_high	Autophagy - animal	0.00122306
ATG7	hsa-miR-302b-3p	high_expressed_in_wm_score_high	high_expressed_in_wm_score_high	Autophagy - animal	0.00122306
ATG7	hsa-miR-302a-3p	high_expressed_in_wm_score_high	high_expressed_in_wm_score_high	Autophagy - animal	0.00122306
ATG7	hsa-miR-302d-3p	high_expressed_in_wm_score_high	high_expressed_in_wm_score_high	Autophagy - animal	0.00122306
ATG7	hsa-miR-373-3p	high_expressed_in_wm_score_high	high_expressed_in_wm_score_high	Autophagy - animal	0.00122306
ATG7	hsa-miR-302c-3p.1	high_expressed_in_wm_score_high	high_expressed_in_wm_score_high	Autophagy - animal	0.00122306
ATG7	hsa-miR-520e	high_expressed_in_wm_score_high	high_expressed_in_wm_score_high	Autophagy - animal	0.00122306
ATG7	hsa-miR-520d-3p	high_expressed_in_wm_score_high	high_expressed_in_wm_score_high	Autophagy - animal	0.00122306
ATXN3	hsa-miR-302d-3p	high_expressed_in_wm_score_high	low_expressed_in_wm_score_high	Protein processing in endoplasmic reticulum	0.0170927
ATXN3	hsa-miR-373-3p	high_expressed_in_wm_score_high	low_expressed_in_wm_score_high	Protein processing in endoplasmic reticulum	0.0170927
ATXN3	hsa-miR-302b-3p	high_expressed_in_wm_score_high	low_expressed_in_wm_score_high	Protein processing in endoplasmic reticulum	0.0170927
ATXN3	hsa-miR-302a-3p	high_expressed_in_wm_score_high	low_expressed_in_wm_score_high	Protein processing in endoplasmic reticulum	0.0170927
ATXN3	hsa-miR-520e	high_expressed_in_wm_score_high	low_expressed_in_wm_score_high	Protein processing in endoplasmic reticulum	0.0170927
ATXN3	hsa-miR-520d-3p	high_expressed_in_wm_score_high	low_expressed_in_wm_score_high	Protein processing in endoplasmic reticulum	0.0170927
ATXN3	hsa-miR-302c-3p.1	high_expressed_in_wm_score_high	low_expressed_in_wm_score_high	Protein processing in endoplasmic reticulum	0.0170927
BAG2	hsa-miR-373-3p	high_expressed_in_wm_score_high	high_expressed_in_wm_score_high	Protein processing in endoplasmic reticulum	0.0170927
BAG2	hsa-miR-520e	high_expressed_in_wm_score_high	high_expressed_in_wm_score_high	Protein processing in endoplasmic reticulum	0.0170927
BAG2	hsa-miR-520d-3p	high_expressed_in_wm_score_high	high_expressed_in_wm_score_high	Protein processing in endoplasmic reticulum	0.0170927
BAG2	hsa-miR-302d-3p	high_expressed_in_wm_score_high	high_expressed_in_wm_score_high	Protein processing in endoplasmic reticulum	0.0170927
BAG2	hsa-miR-302c-3p.1	high_expressed_in_wm_score_high	high_expressed_in_wm_score_high	Protein processing in endoplasmic reticulum	0.0170927
BAG2	hsa-miR-302b-3p	high_expressed_in_wm_score_high	high_expressed_in_wm_score_high	Protein processing in endoplasmic reticulum	0.0170927
BAG2	hsa-miR-302a-3p	high_expressed_in_wm_score_high	high_expressed_in_wm_score_high	Protein processing in endoplasmic reticulum	0.0170927
BAMBI	hsa-miR-373-3p	high_expressed_in_wm_score_high	high_expressed_in_wm_score_high	Wnt signaling pathway	0.00759012
BAMBI	hsa-miR-520d-3p	high_expressed_in_wm_score_high	high_expressed_in_wm_score_high	Wnt signaling pathway	0.00759012
BAMBI	hsa-miR-520e	high_expressed_in_wm_score_high	high_expressed_in_wm_score_high	Wnt signaling pathway	0.00759012
BAMBI	hsa-miR-302a-3p	high_expressed_in_wm_score_high	high_expressed_in_wm_score_high	Wnt signaling pathway	0.00759012
BAMBI	hsa-miR-302d-3p	high_expressed_in_wm_score_high	high_expressed_in_wm_score_high	Wnt signaling pathway	0.00759012
BAMBI	hsa-miR-302c-3p.1	high_expressed_in_wm_score_high	high_expressed_in_wm_score_high	Wnt signaling pathway	0.00759012
BAMBI	hsa-miR-302b-3p	high_expressed_in_wm_score_high	high_expressed_in_wm_score_high	Wnt signaling pathway	0.00759012
BCL11B	hsa-miR-302a-3p	high_expressed_in_wm_score_high	low_expressed_in_wm_score_high	Transcriptional misregulation in cancer	0.00812059
BCL11B	hsa-miR-373-3p	high_expressed_in_wm_score_high	low_expressed_in_wm_score_high	Transcriptional misregulation in cancer	0.00812059
BCL11B	hsa-miR-302c-3p.1	high_expressed_in_wm_score_high	low_expressed_in_wm_score_high	Transcriptional misregulation in cancer	0.00812059
BCL11B	hsa-miR-520d-3p	high_expressed_in_wm_score_high	low_expressed_in_wm_score_high	Transcriptional misregulation in cancer	0.00812059
BCL11B	hsa-miR-520e	high_expressed_in_wm_score_high	low_expressed_in_wm_score_high	Transcriptional misregulation in cancer	0.00812059
BCL11B	hsa-miR-302d-3p	high_expressed_in_wm_score_high	low_expressed_in_wm_score_high	Transcriptional misregulation in cancer	0.00812059
BCL11B	hsa-miR-302b-3p	high_expressed_in_wm_score_high	low_expressed_in_wm_score_high	Transcriptional misregulation in cancer	0.00812059
BCL2L11	hsa-miR-302a-3p	high_expressed_in_wm_score_high	high_expressed_in_wm_score_high	Colorectal cancer	0.00812059
BCL2L11	hsa-miR-520d-3p	high_expressed_in_wm_score_high	high_expressed_in_wm_score_high	Colorectal cancer	0.00812059
BCL2L11	hsa-miR-520e	high_expressed_in_wm_score_high	high_expressed_in_wm_score_high	Colorectal cancer	0.00812059
BCL2L11	hsa-miR-302b-3p	high_expressed_in_wm_score_high	high_expressed_in_wm_score_high	Colorectal cancer	0.00812059
BCL2L11	hsa-miR-373-3p	high_expressed_in_wm_score_high	high_expressed_in_wm_score_high	Colorectal cancer	0.00812059
BCL2L11	hsa-miR-302d-3p	high_expressed_in_wm_score_high	high_expressed_in_wm_score_high	Colorectal cancer	0.00812059
BCL2L11	hsa-miR-302c-3p.1	high_expressed_in_wm_score_high	high_expressed_in_wm_score_high	Colorectal cancer	0.00812059
BCL6	hsa-miR-373-3p	high_expressed_in_wm_score_high	low_expressed_in_wm_score_high	Transcriptional misregulation in cancer	0.00812059
BCL6	hsa-miR-520e	high_expressed_in_wm_score_high	low_expressed_in_wm_score_high	Transcriptional misregulation in cancer	0.00812059
BCL6	hsa-miR-520d-3p	high_expressed_in_wm_score_high	low_expressed_in_wm_score_high	Transcriptional misregulation in cancer	0.00812059
BCL6	hsa-miR-302a-3p	high_expressed_in_wm_score_high	low_expressed_in_wm_score_high	Transcriptional misregulation in cancer	0.00812059
BCL6	hsa-miR-302b-3p	high_expressed_in_wm_score_high	low_expressed_in_wm_score_high	Transcriptional misregulation in cancer	0.00812059
BCL6	hsa-miR-302c-3p.1	high_expressed_in_wm_score_high	low_expressed_in_wm_score_high	Transcriptional misregulation in cancer	0.00812059
BCL6	hsa-miR-302d-3p	high_expressed_in_wm_score_high	low_expressed_in_wm_score_high	Transcriptional misregulation in cancer	0.00812059
BECN1	hsa-miR-371a-5p	high_expressed_in_wm_score_high	high_expressed_in_wm_score_high	Autophagy - animal	0.00122306
BMPR2	hsa-miR-520e	high_expressed_in_wm_score_high	low_expressed_in_wm_score_high	Axon guidance	0.0170671
BMPR2	hsa-miR-302b-3p	high_expressed_in_wm_score_high	low_expressed_in_wm_score_high	Axon guidance	0.0170671
BMPR2	hsa-miR-302c-3p.1	high_expressed_in_wm_score_high	low_expressed_in_wm_score_high	Axon guidance	0.0170671
BMPR2	hsa-miR-520d-3p	high_expressed_in_wm_score_high	low_expressed_in_wm_score_high	Axon guidance	0.0170671
BMPR2	hsa-miR-373-3p	high_expressed_in_wm_score_high	low_expressed_in_wm_score_high	Axon guidance	0.0170671
BMPR2	hsa-miR-302a-3p	high_expressed_in_wm_score_high	low_expressed_in_wm_score_high	Axon guidance	0.0170671
BMPR2	hsa-miR-302d-3p	high_expressed_in_wm_score_high	low_expressed_in_wm_score_high	Axon guidance	0.0170671
BUB3	hsa-miR-371a-5p	high_expressed_in_wm_score_high	high_expressed_in_wm_score_high	Human T-cell leukemia virus 1 infection	0.0175415
CACNG4	hsa-miR-371a-5p	high_expressed_in_wm_score_high	high_expressed_in_wm_score_high	MAPK signaling pathway	0.00349373
CAMK2G	hsa-miR-371a-5p	high_expressed_in_wm_score_high	high_expressed_in_wm_score_high	Axon guidance	0.0170671
CCND1	hsa-miR-302d-3p	high_expressed_in_wm_score_high	high_expressed_in_wm_score_high	Bladder cancer	0.0259407
CCND1	hsa-miR-520e	high_expressed_in_wm_score_high	high_expressed_in_wm_score_high	Bladder cancer	0.0259407
CCND1	hsa-miR-373-3p	high_expressed_in_wm_score_high	high_expressed_in_wm_score_high	Bladder cancer	0.0259407
CCND1	hsa-miR-302b-3p	high_expressed_in_wm_score_high	high_expressed_in_wm_score_high	Bladder cancer	0.0259407
CCND1	hsa-miR-520d-3p	high_expressed_in_wm_score_high	high_expressed_in_wm_score_high	Bladder cancer	0.0259407
CCND1	hsa-miR-302a-3p	high_expressed_in_wm_score_high	high_expressed_in_wm_score_high	Bladder cancer	0.0259407
CCND1	hsa-miR-302c-3p.1	high_expressed_in_wm_score_high	high_expressed_in_wm_score_high	Bladder cancer	0.0259407
CCND2	hsa-miR-520d-3p	high_expressed_in_wm_score_high	low_expressed_in_wm_score_high	Human T-cell leukemia virus 1 infection	0.0175415
CCND2	hsa-miR-520e	high_expressed_in_wm_score_high	low_expressed_in_wm_score_high	Human T-cell leukemia virus 1 infection	0.0175415
CCND2	hsa-miR-302b-3p	high_expressed_in_wm_score_high	low_expressed_in_wm_score_high	Human T-cell leukemia virus 1 infection	0.0175415
CCND2	hsa-miR-302c-3p.1	high_expressed_in_wm_score_high	low_expressed_in_wm_score_high	Human T-cell leukemia virus 1 infection	0.0175415
CCND2	hsa-miR-302d-3p	high_expressed_in_wm_score_high	low_expressed_in_wm_score_high	Human T-cell leukemia virus 1 infection	0.0175415
CCND2	hsa-miR-373-3p	high_expressed_in_wm_score_high	low_expressed_in_wm_score_high	Human T-cell leukemia virus 1 infection	0.0175415
CCND2	hsa-miR-302a-3p	high_expressed_in_wm_score_high	low_expressed_in_wm_score_high	Human T-cell leukemia virus 1 infection	0.0175415
CDC14A	hsa-miR-520e	high_expressed_in_wm_score_high	high_expressed_in_wm_score_high	Cell cycle	0.000545759
CDC14A	hsa-miR-520d-3p	high_expressed_in_wm_score_high	high_expressed_in_wm_score_high	Cell cycle	0.000545759
CDC14A	hsa-miR-302d-3p	high_expressed_in_wm_score_high	high_expressed_in_wm_score_high	Cell cycle	0.000545759
CDC14A	hsa-miR-302b-3p	high_expressed_in_wm_score_high	high_expressed_in_wm_score_high	Cell cycle	0.000545759
CDC14A	hsa-miR-302a-3p	high_expressed_in_wm_score_high	high_expressed_in_wm_score_high	Cell cycle	0.000545759
CDC14A	hsa-miR-302c-3p.1	high_expressed_in_wm_score_high	high_expressed_in_wm_score_high	Cell cycle	0.000545759
CDC14A	hsa-miR-373-3p	high_expressed_in_wm_score_high	high_expressed_in_wm_score_high	Cell cycle	0.000545759
CDC23	hsa-miR-302d-3p	high_expressed_in_wm_score_high	high_expressed_in_wm_score_high	Human T-cell leukemia virus 1 infection	0.0175415
CDC23	hsa-miR-302c-3p.1	high_expressed_in_wm_score_high	high_expressed_in_wm_score_high	Human T-cell leukemia virus 1 infection	0.0175415
CDC23	hsa-miR-302b-3p	high_expressed_in_wm_score_high	high_expressed_in_wm_score_high	Human T-cell leukemia virus 1 infection	0.0175415
CDC23	hsa-miR-302a-3p	high_expressed_in_wm_score_high	high_expressed_in_wm_score_high	Human T-cell leukemia virus 1 infection	0.0175415
CDC23	hsa-miR-373-3p	high_expressed_in_wm_score_high	high_expressed_in_wm_score_high	Human T-cell leukemia virus 1 infection	0.0175415
CDC23	hsa-miR-520e	high_expressed_in_wm_score_high	high_expressed_in_wm_score_high	Human T-cell leukemia virus 1 infection	0.0175415
CDC23	hsa-miR-520d-3p	high_expressed_in_wm_score_high	high_expressed_in_wm_score_high	Human T-cell leukemia virus 1 infection	0.0175415
CDC25A	hsa-miR-302a-3p	high_expressed_in_wm_score_high	high_expressed_in_wm_score_high	Progesterone-mediated oocyte maturation	0.00700649
CDC25A	hsa-miR-302b-3p	high_expressed_in_wm_score_high	high_expressed_in_wm_score_high	Progesterone-mediated oocyte maturation	0.00700649
CDC25A	hsa-miR-302d-3p	high_expressed_in_wm_score_high	high_expressed_in_wm_score_high	Progesterone-mediated oocyte maturation	0.00700649
CDC25A	hsa-miR-520e	high_expressed_in_wm_score_high	high_expressed_in_wm_score_high	Progesterone-mediated oocyte maturation	0.00700649
CDC25A	hsa-miR-302c-3p.1	high_expressed_in_wm_score_high	high_expressed_in_wm_score_high	Progesterone-mediated oocyte maturation	0.00700649
CDC25A	hsa-miR-373-3p	high_expressed_in_wm_score_high	high_expressed_in_wm_score_high	Progesterone-mediated oocyte maturation	0.00700649
CDC25A	hsa-miR-520d-3p	high_expressed_in_wm_score_high	high_expressed_in_wm_score_high	Progesterone-mediated oocyte maturation	0.00700649
CDC25A	hsa-miR-371a-5p	high_expressed_in_wm_score_high	high_expressed_in_wm_score_high	Progesterone-mediated oocyte maturation	0.00700649
CDC27	hsa-miR-520d-3p	high_expressed_in_wm_score_high	high_expressed_in_wm_score_high	Human T-cell leukemia virus 1 infection	0.0175415
CDC27	hsa-miR-302d-3p	high_expressed_in_wm_score_high	high_expressed_in_wm_score_high	Human T-cell leukemia virus 1 infection	0.0175415
CDC27	hsa-miR-373-3p	high_expressed_in_wm_score_high	high_expressed_in_wm_score_high	Human T-cell leukemia virus 1 infection	0.0175415
CDC27	hsa-miR-302c-3p.1	high_expressed_in_wm_score_high	high_expressed_in_wm_score_high	Human T-cell leukemia virus 1 infection	0.0175415
CDC27	hsa-miR-302b-3p	high_expressed_in_wm_score_high	high_expressed_in_wm_score_high	Human T-cell leukemia virus 1 infection	0.0175415
CDC27	hsa-miR-302a-3p	high_expressed_in_wm_score_high	high_expressed_in_wm_score_high	Human T-cell leukemia virus 1 infection	0.0175415
CDC27	hsa-miR-520e	high_expressed_in_wm_score_high	high_expressed_in_wm_score_high	Human T-cell leukemia virus 1 infection	0.0175415
CDC6	hsa-miR-371a-5p	high_expressed_in_wm_score_high	high_expressed_in_wm_score_high	Cell cycle	0.000545759
CDK2	hsa-miR-520d-3p	high_expressed_in_wm_score_high	high_expressed_in_wm_score_high	Human T-cell leukemia virus 1 infection	0.0175415
CDK2	hsa-miR-302c-3p.1	high_expressed_in_wm_score_high	high_expressed_in_wm_score_high	Human T-cell leukemia virus 1 infection	0.0175415
CDK2	hsa-miR-302d-3p	high_expressed_in_wm_score_high	high_expressed_in_wm_score_high	Human T-cell leukemia virus 1 infection	0.0175415
CDK2	hsa-miR-373-3p	high_expressed_in_wm_score_high	high_expressed_in_wm_score_high	Human T-cell leukemia virus 1 infection	0.0175415
CDK2	hsa-miR-302b-3p	high_expressed_in_wm_score_high	high_expressed_in_wm_score_high	Human T-cell leukemia virus 1 infection	0.0175415
CDK2	hsa-miR-302a-3p	high_expressed_in_wm_score_high	high_expressed_in_wm_score_high	Human T-cell leukemia virus 1 infection	0.0175415
CDK2	hsa-miR-520e	high_expressed_in_wm_score_high	high_expressed_in_wm_score_high	Human T-cell leukemia virus 1 infection	0.0175415
CFL2	hsa-miR-302d-3p	high_expressed_in_wm_score_high	low_expressed_in_wm_score_high	Axon guidance	0.0170671
CFL2	hsa-miR-520e	high_expressed_in_wm_score_high	low_expressed_in_wm_score_high	Axon guidance	0.0170671
CFL2	hsa-miR-520d-3p	high_expressed_in_wm_score_high	low_expressed_in_wm_score_high	Axon guidance	0.0170671
CFL2	hsa-miR-302c-3p.1	high_expressed_in_wm_score_high	low_expressed_in_wm_score_high	Axon guidance	0.0170671
CFL2	hsa-miR-302a-3p	high_expressed_in_wm_score_high	low_expressed_in_wm_score_high	Axon guidance	0.0170671
CFL2	hsa-miR-302b-3p	high_expressed_in_wm_score_high	low_expressed_in_wm_score_high	Axon guidance	0.0170671
CFL2	hsa-miR-373-3p	high_expressed_in_wm_score_high	low_expressed_in_wm_score_high	Axon guidance	0.0170671
CFL2	hsa-miR-371a-5p	high_expressed_in_wm_score_high	low_expressed_in_wm_score_high	Axon guidance	0.0170671
CFL2	hsa-miR-371a-5p	high_expressed_in_wm_score_high	low_expressed_in_wm_score_high	Axon guidance	0.0170671
CHRM3	hsa-miR-520d-3p	high_expressed_in_wm_score_high	high_expressed_in_wm_score_high	Regulation of actin cytoskeleton	0.00700649
CHRM3	hsa-miR-520e	high_expressed_in_wm_score_high	high_expressed_in_wm_score_high	Regulation of actin cytoskeleton	0.00700649
CHRM3	hsa-miR-373-3p	high_expressed_in_wm_score_high	high_expressed_in_wm_score_high	Regulation of actin cytoskeleton	0.00700649
CHRM3	hsa-miR-302d-3p	high_expressed_in_wm_score_high	high_expressed_in_wm_score_high	Regulation of actin cytoskeleton	0.00700649
CHRM3	hsa-miR-302b-3p	high_expressed_in_wm_score_high	high_expressed_in_wm_score_high	Regulation of actin cytoskeleton	0.00700649
CHRM3	hsa-miR-302a-3p	high_expressed_in_wm_score_high	high_expressed_in_wm_score_high	Regulation of actin cytoskeleton	0.00700649
CHRM3	hsa-miR-302c-3p.1	high_expressed_in_wm_score_high	high_expressed_in_wm_score_high	Regulation of actin cytoskeleton	0.00700649
COL1A1	hsa-miR-371a-5p	high_expressed_in_wm_score_high	high_expressed_in_wm_score_high	Focal adhesion	0.00764861
COL4A2	hsa-miR-302b-3p	high_expressed_in_wm_score_high	low_expressed_in_wm_score_high	Focal adhesion	0.00764861
COL4A2	hsa-miR-302c-3p.1	high_expressed_in_wm_score_high	low_expressed_in_wm_score_high	Focal adhesion	0.00764861
COL4A2	hsa-miR-520e	high_expressed_in_wm_score_high	low_expressed_in_wm_score_high	Focal adhesion	0.00764861
COL4A2	hsa-miR-520d-3p	high_expressed_in_wm_score_high	low_expressed_in_wm_score_high	Focal adhesion	0.00764861
COL4A2	hsa-miR-302a-3p	high_expressed_in_wm_score_high	low_expressed_in_wm_score_high	Focal adhesion	0.00764861
COL4A2	hsa-miR-373-3p	high_expressed_in_wm_score_high	low_expressed_in_wm_score_high	Focal adhesion	0.00764861
COL4A2	hsa-miR-302d-3p	high_expressed_in_wm_score_high	low_expressed_in_wm_score_high	Focal adhesion	0.00764861
COL4A4	hsa-miR-520d-3p	high_expressed_in_wm_score_high	high_expressed_in_wm_score_high	Focal adhesion	0.00764861
COL4A4	hsa-miR-373-3p	high_expressed_in_wm_score_high	high_expressed_in_wm_score_high	Focal adhesion	0.00764861
COL4A4	hsa-miR-520e	high_expressed_in_wm_score_high	high_expressed_in_wm_score_high	Focal adhesion	0.00764861
COL4A4	hsa-miR-302a-3p	high_expressed_in_wm_score_high	high_expressed_in_wm_score_high	Focal adhesion	0.00764861
COL4A4	hsa-miR-302b-3p	high_expressed_in_wm_score_high	high_expressed_in_wm_score_high	Focal adhesion	0.00764861
COL4A4	hsa-miR-302c-3p.1	high_expressed_in_wm_score_high	high_expressed_in_wm_score_high	Focal adhesion	0.00764861
COL4A4	hsa-miR-302d-3p	high_expressed_in_wm_score_high	high_expressed_in_wm_score_high	Focal adhesion	0.00764861
COL9A1	hsa-miR-371a-5p	high_expressed_in_wm_score_high	low_expressed_in_wm_score_high	Focal adhesion	0.00764861
CPEB1	hsa-miR-302d-3p	high_expressed_in_wm_score_high	low_expressed_in_wm_score_high	Oocyte meiosis	0.00947978
CPEB1	hsa-miR-302c-3p.1	high_expressed_in_wm_score_high	low_expressed_in_wm_score_high	Oocyte meiosis	0.00947978
CPEB1	hsa-miR-302b-3p	high_expressed_in_wm_score_high	low_expressed_in_wm_score_high	Oocyte meiosis	0.00947978
CPEB1	hsa-miR-302a-3p	high_expressed_in_wm_score_high	low_expressed_in_wm_score_high	Oocyte meiosis	0.00947978
CPEB1	hsa-miR-520d-3p	high_expressed_in_wm_score_high	low_expressed_in_wm_score_high	Oocyte meiosis	0.00947978
CPEB1	hsa-miR-520e	high_expressed_in_wm_score_high	low_expressed_in_wm_score_high	Oocyte meiosis	0.00947978
CPEB1	hsa-miR-373-3p	high_expressed_in_wm_score_high	low_expressed_in_wm_score_high	Oocyte meiosis	0.00947978
CPEB2	hsa-miR-520d-3p	high_expressed_in_wm_score_high	low_expressed_in_wm_score_high	Oocyte meiosis	0.00947978
CPEB2	hsa-miR-302b-3p	high_expressed_in_wm_score_high	low_expressed_in_wm_score_high	Oocyte meiosis	0.00947978
CPEB2	hsa-miR-373-3p	high_expressed_in_wm_score_high	low_expressed_in_wm_score_high	Oocyte meiosis	0.00947978
CPEB2	hsa-miR-302d-3p	high_expressed_in_wm_score_high	low_expressed_in_wm_score_high	Oocyte meiosis	0.00947978
CPEB2	hsa-miR-302c-3p.1	high_expressed_in_wm_score_high	low_expressed_in_wm_score_high	Oocyte meiosis	0.00947978
CPEB2	hsa-miR-302a-3p	high_expressed_in_wm_score_high	low_expressed_in_wm_score_high	Oocyte meiosis	0.00947978
CPEB2	hsa-miR-520e	high_expressed_in_wm_score_high	low_expressed_in_wm_score_high	Oocyte meiosis	0.00947978
CPEB3	hsa-miR-373-3p	high_expressed_in_wm_score_high	low_expressed_in_wm_score_high	Oocyte meiosis	0.00947978
CPEB3	hsa-miR-302a-3p	high_expressed_in_wm_score_high	low_expressed_in_wm_score_high	Oocyte meiosis	0.00947978
CPEB3	hsa-miR-302c-3p.1	high_expressed_in_wm_score_high	low_expressed_in_wm_score_high	Oocyte meiosis	0.00947978
CPEB3	hsa-miR-302b-3p	high_expressed_in_wm_score_high	low_expressed_in_wm_score_high	Oocyte meiosis	0.00947978
CPEB3	hsa-miR-520d-3p	high_expressed_in_wm_score_high	low_expressed_in_wm_score_high	Oocyte meiosis	0.00947978
CPEB3	hsa-miR-302d-3p	high_expressed_in_wm_score_high	low_expressed_in_wm_score_high	Oocyte meiosis	0.00947978
CPEB3	hsa-miR-520e	high_expressed_in_wm_score_high	low_expressed_in_wm_score_high	Oocyte meiosis	0.00947978
CPEB4	hsa-miR-302a-3p	high_expressed_in_wm_score_high	low_expressed_in_wm_score_high	Oocyte meiosis	0.00947978
CPEB4	hsa-miR-302b-3p	high_expressed_in_wm_score_high	low_expressed_in_wm_score_high	Oocyte meiosis	0.00947978
CPEB4	hsa-miR-302c-3p.1	high_expressed_in_wm_score_high	low_expressed_in_wm_score_high	Oocyte meiosis	0.00947978
CPEB4	hsa-miR-520e	high_expressed_in_wm_score_high	low_expressed_in_wm_score_high	Oocyte meiosis	0.00947978
CPEB4	hsa-miR-520d-3p	high_expressed_in_wm_score_high	low_expressed_in_wm_score_high	Oocyte meiosis	0.00947978
CPEB4	hsa-miR-302d-3p	high_expressed_in_wm_score_high	low_expressed_in_wm_score_high	Oocyte meiosis	0.00947978
CPEB4	hsa-miR-373-3p	high_expressed_in_wm_score_high	low_expressed_in_wm_score_high	Oocyte meiosis	0.00947978
CPEB4	hsa-miR-371a-5p	high_expressed_in_wm_score_high	low_expressed_in_wm_score_high	Oocyte meiosis	0.00947978
CREB5	hsa-miR-373-3p	high_expressed_in_wm_score_high	high_expressed_in_wm_score_high	Human T-cell leukemia virus 1 infection	0.0175415
CREB5	hsa-miR-520d-3p	high_expressed_in_wm_score_high	high_expressed_in_wm_score_high	Human T-cell leukemia virus 1 infection	0.0175415
CREB5	hsa-miR-520e	high_expressed_in_wm_score_high	high_expressed_in_wm_score_high	Human T-cell leukemia virus 1 infection	0.0175415
CREB5	hsa-miR-302d-3p	high_expressed_in_wm_score_high	high_expressed_in_wm_score_high	Human T-cell leukemia virus 1 infection	0.0175415
CREB5	hsa-miR-302a-3p	high_expressed_in_wm_score_high	high_expressed_in_wm_score_high	Human T-cell leukemia virus 1 infection	0.0175415
CREB5	hsa-miR-302c-3p.1	high_expressed_in_wm_score_high	high_expressed_in_wm_score_high	Human T-cell leukemia virus 1 infection	0.0175415
CREB5	hsa-miR-302b-3p	high_expressed_in_wm_score_high	high_expressed_in_wm_score_high	Human T-cell leukemia virus 1 infection	0.0175415
CRK	hsa-miR-373-3p	high_expressed_in_wm_score_high	low_expressed_in_wm_score_high	Neurotrophin signaling pathway	0.0096311
CRK	hsa-miR-302d-3p	high_expressed_in_wm_score_high	low_expressed_in_wm_score_high	Neurotrophin signaling pathway	0.0096311
CRK	hsa-miR-302c-3p.1	high_expressed_in_wm_score_high	low_expressed_in_wm_score_high	Neurotrophin signaling pathway	0.0096311
CRK	hsa-miR-302b-3p	high_expressed_in_wm_score_high	low_expressed_in_wm_score_high	Neurotrophin signaling pathway	0.0096311
CRK	hsa-miR-302a-3p	high_expressed_in_wm_score_high	low_expressed_in_wm_score_high	Neurotrophin signaling pathway	0.0096311
CRK	hsa-miR-520d-3p	high_expressed_in_wm_score_high	low_expressed_in_wm_score_high	Neurotrophin signaling pathway	0.0096311
CRK	hsa-miR-520e	high_expressed_in_wm_score_high	low_expressed_in_wm_score_high	Neurotrophin signaling pathway	0.0096311
CRTC2	hsa-miR-520d-3p	high_expressed_in_wm_score_high	high_expressed_in_wm_score_high	Human T-cell leukemia virus 1 infection	0.0175415
CRTC2	hsa-miR-302d-3p	high_expressed_in_wm_score_high	high_expressed_in_wm_score_high	Human T-cell leukemia virus 1 infection	0.0175415
CRTC2	hsa-miR-520e	high_expressed_in_wm_score_high	high_expressed_in_wm_score_high	Human T-cell leukemia virus 1 infection	0.0175415
CRTC2	hsa-miR-373-3p	high_expressed_in_wm_score_high	high_expressed_in_wm_score_high	Human T-cell leukemia virus 1 infection	0.0175415
CRTC2	hsa-miR-302c-3p.1	high_expressed_in_wm_score_high	high_expressed_in_wm_score_high	Human T-cell leukemia virus 1 infection	0.0175415
CRTC2	hsa-miR-302b-3p	high_expressed_in_wm_score_high	high_expressed_in_wm_score_high	Human T-cell leukemia virus 1 infection	0.0175415
CRTC2	hsa-miR-302a-3p	high_expressed_in_wm_score_high	high_expressed_in_wm_score_high	Human T-cell leukemia virus 1 infection	0.0175415
CRYAA	hsa-miR-371a-5p	high_expressed_in_wm_score_high	low_expressed_in_wm_score_high	Protein processing in endoplasmic reticulum	0.0170927
CSNK1A1	hsa-miR-371a-5p	high_expressed_in_wm_score_high	high_expressed_in_wm_score_high	Hedgehog signaling pathway	0.0175415
CSNK1A1	hsa-miR-371a-5p	high_expressed_in_wm_score_high	high_expressed_in_wm_score_high	Hedgehog signaling pathway	0.0175415
CSNK1A1	hsa-miR-520d-3p	high_expressed_in_wm_score_high	high_expressed_in_wm_score_high	Hedgehog signaling pathway	0.0175415
CSNK1A1	hsa-miR-520e	high_expressed_in_wm_score_high	high_expressed_in_wm_score_high	Hedgehog signaling pathway	0.0175415
CSNK1A1	hsa-miR-302b-3p	high_expressed_in_wm_score_high	high_expressed_in_wm_score_high	Hedgehog signaling pathway	0.0175415
CSNK1A1	hsa-miR-302c-3p.1	high_expressed_in_wm_score_high	high_expressed_in_wm_score_high	Hedgehog signaling pathway	0.0175415
CSNK1A1	hsa-miR-302d-3p	high_expressed_in_wm_score_high	high_expressed_in_wm_score_high	Hedgehog signaling pathway	0.0175415
CSNK1A1	hsa-miR-302a-3p	high_expressed_in_wm_score_high	high_expressed_in_wm_score_high	Hedgehog signaling pathway	0.0175415
CSNK1A1	hsa-miR-373-3p	high_expressed_in_wm_score_high	high_expressed_in_wm_score_high	Hedgehog signaling pathway	0.0175415
CTNNA3	hsa-miR-371a-5p	high_expressed_in_wm_score_high	low_expressed_in_wm_score_high	Endometrial cancer	0.00812059
CUL3	hsa-miR-371a-5p	high_expressed_in_wm_score_high	low_expressed_in_wm_score_high	Hedgehog signaling pathway	0.0175415
CUL3	hsa-miR-302c-3p.1	high_expressed_in_wm_score_high	low_expressed_in_wm_score_high	Hedgehog signaling pathway	0.0175415
CUL3	hsa-miR-302d-3p	high_expressed_in_wm_score_high	low_expressed_in_wm_score_high	Hedgehog signaling pathway	0.0175415
CUL3	hsa-miR-302a-3p	high_expressed_in_wm_score_high	low_expressed_in_wm_score_high	Hedgehog signaling pathway	0.0175415
CUL3	hsa-miR-302b-3p	high_expressed_in_wm_score_high	low_expressed_in_wm_score_high	Hedgehog signaling pathway	0.0175415
CUL3	hsa-miR-373-3p	high_expressed_in_wm_score_high	low_expressed_in_wm_score_high	Hedgehog signaling pathway	0.0175415
CUL3	hsa-miR-520d-3p	high_expressed_in_wm_score_high	low_expressed_in_wm_score_high	Hedgehog signaling pathway	0.0175415
CUL3	hsa-miR-520e	high_expressed_in_wm_score_high	low_expressed_in_wm_score_high	Hedgehog signaling pathway	0.0175415
CUL3	hsa-miR-520d-3p	high_expressed_in_wm_score_high	low_expressed_in_wm_score_high	Hedgehog signaling pathway	0.0175415
CUL3	hsa-miR-302a-3p	high_expressed_in_wm_score_high	low_expressed_in_wm_score_high	Hedgehog signaling pathway	0.0175415
CUL3	hsa-miR-373-3p	high_expressed_in_wm_score_high	low_expressed_in_wm_score_high	Hedgehog signaling pathway	0.0175415
CUL3	hsa-miR-302d-3p	high_expressed_in_wm_score_high	low_expressed_in_wm_score_high	Hedgehog signaling pathway	0.0175415
CUL3	hsa-miR-302c-3p.1	high_expressed_in_wm_score_high	low_expressed_in_wm_score_high	Hedgehog signaling pathway	0.0175415
CUL3	hsa-miR-520e	high_expressed_in_wm_score_high	low_expressed_in_wm_score_high	Hedgehog signaling pathway	0.0175415
CUL3	hsa-miR-302b-3p	high_expressed_in_wm_score_high	low_expressed_in_wm_score_high	Hedgehog signaling pathway	0.0175415
DAPK2	hsa-miR-302a-3p	high_expressed_in_wm_score_high	low_expressed_in_wm_score_high	Bladder cancer	0.0259407
DAPK2	hsa-miR-302b-3p	high_expressed_in_wm_score_high	low_expressed_in_wm_score_high	Bladder cancer	0.0259407
DAPK2	hsa-miR-302c-3p.1	high_expressed_in_wm_score_high	low_expressed_in_wm_score_high	Bladder cancer	0.0259407
DAPK2	hsa-miR-302d-3p	high_expressed_in_wm_score_high	low_expressed_in_wm_score_high	Bladder cancer	0.0259407
DAPK2	hsa-miR-373-3p	high_expressed_in_wm_score_high	low_expressed_in_wm_score_high	Bladder cancer	0.0259407
DAPK2	hsa-miR-520d-3p	high_expressed_in_wm_score_high	low_expressed_in_wm_score_high	Bladder cancer	0.0259407
DAPK2	hsa-miR-520e	high_expressed_in_wm_score_high	low_expressed_in_wm_score_high	Bladder cancer	0.0259407
DERL2	hsa-miR-520d-3p	high_expressed_in_wm_score_high	low_expressed_in_wm_score_high	Protein processing in endoplasmic reticulum	0.0170927
DERL2	hsa-miR-520e	high_expressed_in_wm_score_high	low_expressed_in_wm_score_high	Protein processing in endoplasmic reticulum	0.0170927
DERL2	hsa-miR-373-3p	high_expressed_in_wm_score_high	low_expressed_in_wm_score_high	Protein processing in endoplasmic reticulum	0.0170927
DERL2	hsa-miR-302d-3p	high_expressed_in_wm_score_high	low_expressed_in_wm_score_high	Protein processing in endoplasmic reticulum	0.0170927
DERL2	hsa-miR-302c-3p.1	high_expressed_in_wm_score_high	low_expressed_in_wm_score_high	Protein processing in endoplasmic reticulum	0.0170927
DERL2	hsa-miR-302b-3p	high_expressed_in_wm_score_high	low_expressed_in_wm_score_high	Protein processing in endoplasmic reticulum	0.0170927
DERL2	hsa-miR-302a-3p	high_expressed_in_wm_score_high	low_expressed_in_wm_score_high	Protein processing in endoplasmic reticulum	0.0170927
DIAPH2	hsa-miR-371a-5p	high_expressed_in_wm_score_high	low_expressed_in_wm_score_high	Regulation of actin cytoskeleton	0.00700649
DKK1	hsa-miR-302d-3p	high_expressed_in_wm_score_high	high_expressed_in_wm_score_high	Wnt signaling pathway	0.00759012
DKK1	hsa-miR-302c-3p.1	high_expressed_in_wm_score_high	high_expressed_in_wm_score_high	Wnt signaling pathway	0.00759012
DKK1	hsa-miR-373-3p	high_expressed_in_wm_score_high	high_expressed_in_wm_score_high	Wnt signaling pathway	0.00759012
DKK1	hsa-miR-302a-3p	high_expressed_in_wm_score_high	high_expressed_in_wm_score_high	Wnt signaling pathway	0.00759012
DKK1	hsa-miR-302b-3p	high_expressed_in_wm_score_high	high_expressed_in_wm_score_high	Wnt signaling pathway	0.00759012
DKK1	hsa-miR-520e	high_expressed_in_wm_score_high	high_expressed_in_wm_score_high	Wnt signaling pathway	0.00759012
DKK1	hsa-miR-520d-3p	high_expressed_in_wm_score_high	high_expressed_in_wm_score_high	Wnt signaling pathway	0.00759012
DLG4	hsa-miR-371a-5p	high_expressed_in_wm_score_high	high_expressed_in_wm_score_high	Hippo signaling pathway	0.00273368
DNAJA2	hsa-miR-373-3p	high_expressed_in_wm_score_high	low_expressed_in_wm_score_high	Protein processing in endoplasmic reticulum	0.0170927
DNAJA2	hsa-miR-520e	high_expressed_in_wm_score_high	low_expressed_in_wm_score_high	Protein processing in endoplasmic reticulum	0.0170927
DNAJA2	hsa-miR-520d-3p	high_expressed_in_wm_score_high	low_expressed_in_wm_score_high	Protein processing in endoplasmic reticulum	0.0170927
DNAJA2	hsa-miR-302c-3p.1	high_expressed_in_wm_score_high	low_expressed_in_wm_score_high	Protein processing in endoplasmic reticulum	0.0170927
DNAJA2	hsa-miR-302b-3p	high_expressed_in_wm_score_high	low_expressed_in_wm_score_high	Protein processing in endoplasmic reticulum	0.0170927
DNAJA2	hsa-miR-302a-3p	high_expressed_in_wm_score_high	low_expressed_in_wm_score_high	Protein processing in endoplasmic reticulum	0.0170927
DNAJA2	hsa-miR-302d-3p	high_expressed_in_wm_score_high	low_expressed_in_wm_score_high	Protein processing in endoplasmic reticulum	0.0170927
DNAJB1	hsa-miR-371a-5p	high_expressed_in_wm_score_high	low_expressed_in_wm_score_high	Protein processing in endoplasmic reticulum	0.0170927
DPYSL5	hsa-miR-520e	high_expressed_in_wm_score_high	high_expressed_in_wm_score_high	Axon guidance	0.0170671
DPYSL5	hsa-miR-520d-3p	high_expressed_in_wm_score_high	high_expressed_in_wm_score_high	Axon guidance	0.0170671
DPYSL5	hsa-miR-302c-3p.1	high_expressed_in_wm_score_high	high_expressed_in_wm_score_high	Axon guidance	0.0170671
DPYSL5	hsa-miR-302a-3p	high_expressed_in_wm_score_high	high_expressed_in_wm_score_high	Axon guidance	0.0170671
DPYSL5	hsa-miR-302d-3p	high_expressed_in_wm_score_high	high_expressed_in_wm_score_high	Axon guidance	0.0170671
DPYSL5	hsa-miR-373-3p	high_expressed_in_wm_score_high	high_expressed_in_wm_score_high	Axon guidance	0.0170671
DPYSL5	hsa-miR-302b-3p	high_expressed_in_wm_score_high	high_expressed_in_wm_score_high	Axon guidance	0.0170671
DUSP2	hsa-miR-302a-3p	high_expressed_in_wm_score_high	high_expressed_in_wm_score_high	MAPK signaling pathway	0.00349373
DUSP2	hsa-miR-302b-3p	high_expressed_in_wm_score_high	high_expressed_in_wm_score_high	MAPK signaling pathway	0.00349373
DUSP2	hsa-miR-302d-3p	high_expressed_in_wm_score_high	high_expressed_in_wm_score_high	MAPK signaling pathway	0.00349373
DUSP2	hsa-miR-302c-3p.1	high_expressed_in_wm_score_high	high_expressed_in_wm_score_high	MAPK signaling pathway	0.00349373
DUSP2	hsa-miR-373-3p	high_expressed_in_wm_score_high	high_expressed_in_wm_score_high	MAPK signaling pathway	0.00349373
DUSP2	hsa-miR-520e	high_expressed_in_wm_score_high	high_expressed_in_wm_score_high	MAPK signaling pathway	0.00349373
DUSP2	hsa-miR-520d-3p	high_expressed_in_wm_score_high	high_expressed_in_wm_score_high	MAPK signaling pathway	0.00349373
E2F1	hsa-miR-520d-3p	high_expressed_in_wm_score_high	high_expressed_in_wm_score_high	Bladder cancer	0.0259407
E2F1	hsa-miR-373-3p	high_expressed_in_wm_score_high	high_expressed_in_wm_score_high	Bladder cancer	0.0259407
E2F1	hsa-miR-520e	high_expressed_in_wm_score_high	high_expressed_in_wm_score_high	Bladder cancer	0.0259407
E2F1	hsa-miR-302d-3p	high_expressed_in_wm_score_high	high_expressed_in_wm_score_high	Bladder cancer	0.0259407
E2F1	hsa-miR-302c-3p.1	high_expressed_in_wm_score_high	high_expressed_in_wm_score_high	Bladder cancer	0.0259407
E2F1	hsa-miR-302b-3p	high_expressed_in_wm_score_high	high_expressed_in_wm_score_high	Bladder cancer	0.0259407
E2F1	hsa-miR-302a-3p	high_expressed_in_wm_score_high	high_expressed_in_wm_score_high	Bladder cancer	0.0259407
E2F2	hsa-miR-302a-3p	high_expressed_in_wm_score_high	high_expressed_in_wm_score_high	Bladder cancer	0.0259407
E2F2	hsa-miR-520e	high_expressed_in_wm_score_high	high_expressed_in_wm_score_high	Bladder cancer	0.0259407
E2F2	hsa-miR-520d-3p	high_expressed_in_wm_score_high	high_expressed_in_wm_score_high	Bladder cancer	0.0259407
E2F2	hsa-miR-302d-3p	high_expressed_in_wm_score_high	high_expressed_in_wm_score_high	Bladder cancer	0.0259407
E2F2	hsa-miR-302c-3p.1	high_expressed_in_wm_score_high	high_expressed_in_wm_score_high	Bladder cancer	0.0259407
E2F2	hsa-miR-302b-3p	high_expressed_in_wm_score_high	high_expressed_in_wm_score_high	Bladder cancer	0.0259407
E2F2	hsa-miR-373-3p	high_expressed_in_wm_score_high	high_expressed_in_wm_score_high	Bladder cancer	0.0259407
E2F2	hsa-miR-520d-3p	high_expressed_in_wm_score_high	high_expressed_in_wm_score_high	Bladder cancer	0.0259407
E2F2	hsa-miR-302d-3p	high_expressed_in_wm_score_high	high_expressed_in_wm_score_high	Bladder cancer	0.0259407
E2F2	hsa-miR-302b-3p	high_expressed_in_wm_score_high	high_expressed_in_wm_score_high	Bladder cancer	0.0259407
E2F2	hsa-miR-520e	high_expressed_in_wm_score_high	high_expressed_in_wm_score_high	Bladder cancer	0.0259407
E2F2	hsa-miR-373-3p	high_expressed_in_wm_score_high	high_expressed_in_wm_score_high	Bladder cancer	0.0259407
E2F2	hsa-miR-302a-3p	high_expressed_in_wm_score_high	high_expressed_in_wm_score_high	Bladder cancer	0.0259407
E2F2	hsa-miR-302c-3p.1	high_expressed_in_wm_score_high	high_expressed_in_wm_score_high	Bladder cancer	0.0259407
E2F3	hsa-miR-520e	high_expressed_in_wm_score_high	high_expressed_in_wm_score_high	Bladder cancer	0.0259407
E2F3	hsa-miR-302a-3p	high_expressed_in_wm_score_high	high_expressed_in_wm_score_high	Bladder cancer	0.0259407
E2F3	hsa-miR-302b-3p	high_expressed_in_wm_score_high	high_expressed_in_wm_score_high	Bladder cancer	0.0259407
E2F3	hsa-miR-302c-3p.1	high_expressed_in_wm_score_high	high_expressed_in_wm_score_high	Bladder cancer	0.0259407
E2F3	hsa-miR-302d-3p	high_expressed_in_wm_score_high	high_expressed_in_wm_score_high	Bladder cancer	0.0259407
E2F3	hsa-miR-520d-3p	high_expressed_in_wm_score_high	high_expressed_in_wm_score_high	Bladder cancer	0.0259407
E2F3	hsa-miR-373-3p	high_expressed_in_wm_score_high	high_expressed_in_wm_score_high	Bladder cancer	0.0259407
E2F5	hsa-miR-520d-3p	high_expressed_in_wm_score_high	high_expressed_in_wm_score_high	Cellular senescence	0.00471919
E2F5	hsa-miR-302a-3p	high_expressed_in_wm_score_high	high_expressed_in_wm_score_high	Cellular senescence	0.00471919
E2F5	hsa-miR-302b-3p	high_expressed_in_wm_score_high	high_expressed_in_wm_score_high	Cellular senescence	0.00471919
E2F5	hsa-miR-302c-3p.1	high_expressed_in_wm_score_high	high_expressed_in_wm_score_high	Cellular senescence	0.00471919
E2F5	hsa-miR-302d-3p	high_expressed_in_wm_score_high	high_expressed_in_wm_score_high	Cellular senescence	0.00471919
E2F5	hsa-miR-373-3p	high_expressed_in_wm_score_high	high_expressed_in_wm_score_high	Cellular senescence	0.00471919
E2F5	hsa-miR-520e	high_expressed_in_wm_score_high	high_expressed_in_wm_score_high	Cellular senescence	0.00471919
EFNB2	hsa-miR-520d-3p	high_expressed_in_wm_score_high	low_expressed_in_wm_score_high	Axon guidance	0.0170671
EFNB2	hsa-miR-520e	high_expressed_in_wm_score_high	low_expressed_in_wm_score_high	Axon guidance	0.0170671
EFNB2	hsa-miR-373-3p	high_expressed_in_wm_score_high	low_expressed_in_wm_score_high	Axon guidance	0.0170671
EFNB2	hsa-miR-302d-3p	high_expressed_in_wm_score_high	low_expressed_in_wm_score_high	Axon guidance	0.0170671
EFNB2	hsa-miR-302c-3p.1	high_expressed_in_wm_score_high	low_expressed_in_wm_score_high	Axon guidance	0.0170671
EFNB2	hsa-miR-302b-3p	high_expressed_in_wm_score_high	low_expressed_in_wm_score_high	Axon guidance	0.0170671
EFNB2	hsa-miR-302a-3p	high_expressed_in_wm_score_high	low_expressed_in_wm_score_high	Axon guidance	0.0170671
EGFR	hsa-miR-520e	high_expressed_in_wm_score_high	low_expressed_in_wm_score_high	Bladder cancer	0.0259407
EGFR	hsa-miR-520d-3p	high_expressed_in_wm_score_high	low_expressed_in_wm_score_high	Bladder cancer	0.0259407
EGFR	hsa-miR-302a-3p	high_expressed_in_wm_score_high	low_expressed_in_wm_score_high	Bladder cancer	0.0259407
EGFR	hsa-miR-302b-3p	high_expressed_in_wm_score_high	low_expressed_in_wm_score_high	Bladder cancer	0.0259407
EGFR	hsa-miR-302c-3p.1	high_expressed_in_wm_score_high	low_expressed_in_wm_score_high	Bladder cancer	0.0259407
EGFR	hsa-miR-302d-3p	high_expressed_in_wm_score_high	low_expressed_in_wm_score_high	Bladder cancer	0.0259407
EGFR	hsa-miR-373-3p	high_expressed_in_wm_score_high	low_expressed_in_wm_score_high	Bladder cancer	0.0259407
EIF2S1	hsa-miR-302d-3p	high_expressed_in_wm_score_high	low_expressed_in_wm_score_high	Protein processing in endoplasmic reticulum	0.0170927
EIF2S1	hsa-miR-302c-3p.1	high_expressed_in_wm_score_high	low_expressed_in_wm_score_high	Protein processing in endoplasmic reticulum	0.0170927
EIF2S1	hsa-miR-373-3p	high_expressed_in_wm_score_high	low_expressed_in_wm_score_high	Protein processing in endoplasmic reticulum	0.0170927
EIF2S1	hsa-miR-302a-3p	high_expressed_in_wm_score_high	low_expressed_in_wm_score_high	Protein processing in endoplasmic reticulum	0.0170927
EIF2S1	hsa-miR-302b-3p	high_expressed_in_wm_score_high	low_expressed_in_wm_score_high	Protein processing in endoplasmic reticulum	0.0170927
EIF2S1	hsa-miR-520d-3p	high_expressed_in_wm_score_high	low_expressed_in_wm_score_high	Protein processing in endoplasmic reticulum	0.0170927
EIF2S1	hsa-miR-520e	high_expressed_in_wm_score_high	low_expressed_in_wm_score_high	Protein processing in endoplasmic reticulum	0.0170927
ELK4	hsa-miR-302a-3p	high_expressed_in_wm_score_high	high_expressed_in_wm_score_high	Human T-cell leukemia virus 1 infection	0.0175415
ELK4	hsa-miR-520e	high_expressed_in_wm_score_high	high_expressed_in_wm_score_high	Human T-cell leukemia virus 1 infection	0.0175415
ELK4	hsa-miR-373-3p	high_expressed_in_wm_score_high	high_expressed_in_wm_score_high	Human T-cell leukemia virus 1 infection	0.0175415
ELK4	hsa-miR-302d-3p	high_expressed_in_wm_score_high	high_expressed_in_wm_score_high	Human T-cell leukemia virus 1 infection	0.0175415
ELK4	hsa-miR-302c-3p.1	high_expressed_in_wm_score_high	high_expressed_in_wm_score_high	Human T-cell leukemia virus 1 infection	0.0175415
ELK4	hsa-miR-520d-3p	high_expressed_in_wm_score_high	high_expressed_in_wm_score_high	Human T-cell leukemia virus 1 infection	0.0175415
ELK4	hsa-miR-302b-3p	high_expressed_in_wm_score_high	high_expressed_in_wm_score_high	Human T-cell leukemia virus 1 infection	0.0175415
ELK4	hsa-miR-302d-3p	high_expressed_in_wm_score_high	high_expressed_in_wm_score_high	Human T-cell leukemia virus 1 infection	0.0175415
ELK4	hsa-miR-302c-3p.1	high_expressed_in_wm_score_high	high_expressed_in_wm_score_high	Human T-cell leukemia virus 1 infection	0.0175415
ELK4	hsa-miR-520d-3p	high_expressed_in_wm_score_high	high_expressed_in_wm_score_high	Human T-cell leukemia virus 1 infection	0.0175415
ELK4	hsa-miR-302b-3p	high_expressed_in_wm_score_high	high_expressed_in_wm_score_high	Human T-cell leukemia virus 1 infection	0.0175415
ELK4	hsa-miR-520e	high_expressed_in_wm_score_high	high_expressed_in_wm_score_high	Human T-cell leukemia virus 1 infection	0.0175415
ELK4	hsa-miR-373-3p	high_expressed_in_wm_score_high	high_expressed_in_wm_score_high	Human T-cell leukemia virus 1 infection	0.0175415
ELK4	hsa-miR-302a-3p	high_expressed_in_wm_score_high	high_expressed_in_wm_score_high	Human T-cell leukemia virus 1 infection	0.0175415
ELK4	hsa-miR-371a-5p	high_expressed_in_wm_score_high	high_expressed_in_wm_score_high	Human T-cell leukemia virus 1 infection	0.0175415
EPHA2	hsa-miR-302d-3p	high_expressed_in_wm_score_high	low_expressed_in_wm_score_high	Axon guidance	0.0170671
EPHA2	hsa-miR-302c-3p.1	high_expressed_in_wm_score_high	low_expressed_in_wm_score_high	Axon guidance	0.0170671
EPHA2	hsa-miR-302b-3p	high_expressed_in_wm_score_high	low_expressed_in_wm_score_high	Axon guidance	0.0170671
EPHA2	hsa-miR-373-3p	high_expressed_in_wm_score_high	low_expressed_in_wm_score_high	Axon guidance	0.0170671
EPHA2	hsa-miR-520e	high_expressed_in_wm_score_high	low_expressed_in_wm_score_high	Axon guidance	0.0170671
EPHA2	hsa-miR-302a-3p	high_expressed_in_wm_score_high	low_expressed_in_wm_score_high	Axon guidance	0.0170671
EPHA2	hsa-miR-520d-3p	high_expressed_in_wm_score_high	low_expressed_in_wm_score_high	Axon guidance	0.0170671
EPHA5	hsa-miR-520e	high_expressed_in_wm_score_high	low_expressed_in_wm_score_high	Axon guidance	0.0170671
EPHA5	hsa-miR-302c-3p.1	high_expressed_in_wm_score_high	low_expressed_in_wm_score_high	Axon guidance	0.0170671
EPHA5	hsa-miR-520d-3p	high_expressed_in_wm_score_high	low_expressed_in_wm_score_high	Axon guidance	0.0170671
EPHA5	hsa-miR-302b-3p	high_expressed_in_wm_score_high	low_expressed_in_wm_score_high	Axon guidance	0.0170671
EPHA5	hsa-miR-302d-3p	high_expressed_in_wm_score_high	low_expressed_in_wm_score_high	Axon guidance	0.0170671
EPHA5	hsa-miR-373-3p	high_expressed_in_wm_score_high	low_expressed_in_wm_score_high	Axon guidance	0.0170671
EPHA5	hsa-miR-302a-3p	high_expressed_in_wm_score_high	low_expressed_in_wm_score_high	Axon guidance	0.0170671
EPHA7	hsa-miR-302a-3p	high_expressed_in_wm_score_high	low_expressed_in_wm_score_high	Axon guidance	0.0170671
EPHA7	hsa-miR-302b-3p	high_expressed_in_wm_score_high	low_expressed_in_wm_score_high	Axon guidance	0.0170671
EPHA7	hsa-miR-302c-3p.1	high_expressed_in_wm_score_high	low_expressed_in_wm_score_high	Axon guidance	0.0170671
EPHA7	hsa-miR-302d-3p	high_expressed_in_wm_score_high	low_expressed_in_wm_score_high	Axon guidance	0.0170671
EPHA7	hsa-miR-373-3p	high_expressed_in_wm_score_high	low_expressed_in_wm_score_high	Axon guidance	0.0170671
EPHA7	hsa-miR-520e	high_expressed_in_wm_score_high	low_expressed_in_wm_score_high	Axon guidance	0.0170671
EPHA7	hsa-miR-520d-3p	high_expressed_in_wm_score_high	low_expressed_in_wm_score_high	Axon guidance	0.0170671
ERBB4	hsa-miR-520e	high_expressed_in_wm_score_high	high_expressed_in_wm_score_high	PI3K-Akt signaling pathway	0.00759012
ERBB4	hsa-miR-373-3p	high_expressed_in_wm_score_high	high_expressed_in_wm_score_high	PI3K-Akt signaling pathway	0.00759012
ERBB4	hsa-miR-302a-3p	high_expressed_in_wm_score_high	high_expressed_in_wm_score_high	PI3K-Akt signaling pathway	0.00759012
ERBB4	hsa-miR-302b-3p	high_expressed_in_wm_score_high	high_expressed_in_wm_score_high	PI3K-Akt signaling pathway	0.00759012
ERBB4	hsa-miR-302c-3p.1	high_expressed_in_wm_score_high	high_expressed_in_wm_score_high	PI3K-Akt signaling pathway	0.00759012
ERBB4	hsa-miR-520d-3p	high_expressed_in_wm_score_high	high_expressed_in_wm_score_high	PI3K-Akt signaling pathway	0.00759012
ERBB4	hsa-miR-302d-3p	high_expressed_in_wm_score_high	high_expressed_in_wm_score_high	PI3K-Akt signaling pathway	0.00759012
ERP29	hsa-miR-371a-5p	high_expressed_in_wm_score_high	high_expressed_in_wm_score_high	Protein processing in endoplasmic reticulum	0.0170927
ESR1	hsa-miR-520e	high_expressed_in_wm_score_high	low_expressed_in_wm_score_high	Breast cancer	0.00122306
ESR1	hsa-miR-302d-3p	high_expressed_in_wm_score_high	low_expressed_in_wm_score_high	Breast cancer	0.00122306
ESR1	hsa-miR-520d-3p	high_expressed_in_wm_score_high	low_expressed_in_wm_score_high	Breast cancer	0.00122306
ESR1	hsa-miR-302a-3p	high_expressed_in_wm_score_high	low_expressed_in_wm_score_high	Breast cancer	0.00122306
ESR1	hsa-miR-302c-3p.1	high_expressed_in_wm_score_high	low_expressed_in_wm_score_high	Breast cancer	0.00122306
ESR1	hsa-miR-302b-3p	high_expressed_in_wm_score_high	low_expressed_in_wm_score_high	Breast cancer	0.00122306
ESR1	hsa-miR-373-3p	high_expressed_in_wm_score_high	low_expressed_in_wm_score_high	Breast cancer	0.00122306
ETV1	hsa-miR-373-3p	high_expressed_in_wm_score_high	high_expressed_in_wm_score_high	Transcriptional misregulation in cancer	0.00812059
ETV1	hsa-miR-302d-3p	high_expressed_in_wm_score_high	high_expressed_in_wm_score_high	Transcriptional misregulation in cancer	0.00812059
ETV1	hsa-miR-520e	high_expressed_in_wm_score_high	high_expressed_in_wm_score_high	Transcriptional misregulation in cancer	0.00812059
ETV1	hsa-miR-302b-3p	high_expressed_in_wm_score_high	high_expressed_in_wm_score_high	Transcriptional misregulation in cancer	0.00812059
ETV1	hsa-miR-302c-3p.1	high_expressed_in_wm_score_high	high_expressed_in_wm_score_high	Transcriptional misregulation in cancer	0.00812059
ETV1	hsa-miR-302a-3p	high_expressed_in_wm_score_high	high_expressed_in_wm_score_high	Transcriptional misregulation in cancer	0.00812059
ETV1	hsa-miR-520d-3p	high_expressed_in_wm_score_high	high_expressed_in_wm_score_high	Transcriptional misregulation in cancer	0.00812059
ETV1	hsa-miR-371a-5p	high_expressed_in_wm_score_high	high_expressed_in_wm_score_high	Transcriptional misregulation in cancer	0.00812059
ETV5	hsa-miR-371a-5p	high_expressed_in_wm_score_high	high_expressed_in_wm_score_high	Prostate cancer	0.00889546
FGF10	hsa-miR-520e	high_expressed_in_wm_score_high	low_expressed_in_wm_score_high	PI3K-Akt signaling pathway	0.00759012
FGF10	hsa-miR-520d-3p	high_expressed_in_wm_score_high	low_expressed_in_wm_score_high	PI3K-Akt signaling pathway	0.00759012
FGF10	hsa-miR-302c-3p.1	high_expressed_in_wm_score_high	low_expressed_in_wm_score_high	PI3K-Akt signaling pathway	0.00759012
FGF10	hsa-miR-373-3p	high_expressed_in_wm_score_high	low_expressed_in_wm_score_high	PI3K-Akt signaling pathway	0.00759012
FGF10	hsa-miR-302d-3p	high_expressed_in_wm_score_high	low_expressed_in_wm_score_high	PI3K-Akt signaling pathway	0.00759012
FGF10	hsa-miR-302b-3p	high_expressed_in_wm_score_high	low_expressed_in_wm_score_high	PI3K-Akt signaling pathway	0.00759012
FGF10	hsa-miR-302a-3p	high_expressed_in_wm_score_high	low_expressed_in_wm_score_high	PI3K-Akt signaling pathway	0.00759012
FGF10	hsa-miR-302d-3p	high_expressed_in_wm_score_high	low_expressed_in_wm_score_high	PI3K-Akt signaling pathway	0.00759012
FGF10	hsa-miR-373-3p	high_expressed_in_wm_score_high	low_expressed_in_wm_score_high	PI3K-Akt signaling pathway	0.00759012
FGF10	hsa-miR-520e	high_expressed_in_wm_score_high	low_expressed_in_wm_score_high	PI3K-Akt signaling pathway	0.00759012
FGF10	hsa-miR-302a-3p	high_expressed_in_wm_score_high	low_expressed_in_wm_score_high	PI3K-Akt signaling pathway	0.00759012
FGF10	hsa-miR-302c-3p.1	high_expressed_in_wm_score_high	low_expressed_in_wm_score_high	PI3K-Akt signaling pathway	0.00759012
FGF10	hsa-miR-520d-3p	high_expressed_in_wm_score_high	low_expressed_in_wm_score_high	PI3K-Akt signaling pathway	0.00759012
FGF10	hsa-miR-302b-3p	high_expressed_in_wm_score_high	low_expressed_in_wm_score_high	PI3K-Akt signaling pathway	0.00759012
FGF16	hsa-miR-520e	high_expressed_in_wm_score_high	high_expressed_in_wm_score_high	PI3K-Akt signaling pathway	0.00759012
FGF16	hsa-miR-520d-3p	high_expressed_in_wm_score_high	high_expressed_in_wm_score_high	PI3K-Akt signaling pathway	0.00759012
FGF16	hsa-miR-373-3p	high_expressed_in_wm_score_high	high_expressed_in_wm_score_high	PI3K-Akt signaling pathway	0.00759012
FGF16	hsa-miR-302d-3p	high_expressed_in_wm_score_high	high_expressed_in_wm_score_high	PI3K-Akt signaling pathway	0.00759012
FGF16	hsa-miR-302c-3p.1	high_expressed_in_wm_score_high	high_expressed_in_wm_score_high	PI3K-Akt signaling pathway	0.00759012
FGF16	hsa-miR-302b-3p	high_expressed_in_wm_score_high	high_expressed_in_wm_score_high	PI3K-Akt signaling pathway	0.00759012
FGF16	hsa-miR-302a-3p	high_expressed_in_wm_score_high	high_expressed_in_wm_score_high	PI3K-Akt signaling pathway	0.00759012
FGF19	hsa-miR-302c-3p.1	high_expressed_in_wm_score_high	high_expressed_in_wm_score_high	PI3K-Akt signaling pathway	0.00759012
FGF19	hsa-miR-302d-3p	high_expressed_in_wm_score_high	high_expressed_in_wm_score_high	PI3K-Akt signaling pathway	0.00759012
FGF19	hsa-miR-373-3p	high_expressed_in_wm_score_high	high_expressed_in_wm_score_high	PI3K-Akt signaling pathway	0.00759012
FGF19	hsa-miR-520d-3p	high_expressed_in_wm_score_high	high_expressed_in_wm_score_high	PI3K-Akt signaling pathway	0.00759012
FGF19	hsa-miR-520e	high_expressed_in_wm_score_high	high_expressed_in_wm_score_high	PI3K-Akt signaling pathway	0.00759012
FGF19	hsa-miR-302b-3p	high_expressed_in_wm_score_high	high_expressed_in_wm_score_high	PI3K-Akt signaling pathway	0.00759012
FGF19	hsa-miR-302a-3p	high_expressed_in_wm_score_high	high_expressed_in_wm_score_high	PI3K-Akt signaling pathway	0.00759012
FGF9	hsa-miR-302a-3p	high_expressed_in_wm_score_high	high_expressed_in_wm_score_high	PI3K-Akt signaling pathway	0.00759012
FGF9	hsa-miR-520e	high_expressed_in_wm_score_high	high_expressed_in_wm_score_high	PI3K-Akt signaling pathway	0.00759012
FGF9	hsa-miR-520d-3p	high_expressed_in_wm_score_high	high_expressed_in_wm_score_high	PI3K-Akt signaling pathway	0.00759012
FGF9	hsa-miR-373-3p	high_expressed_in_wm_score_high	high_expressed_in_wm_score_high	PI3K-Akt signaling pathway	0.00759012
FGF9	hsa-miR-302d-3p	high_expressed_in_wm_score_high	high_expressed_in_wm_score_high	PI3K-Akt signaling pathway	0.00759012
FGF9	hsa-miR-302b-3p	high_expressed_in_wm_score_high	high_expressed_in_wm_score_high	PI3K-Akt signaling pathway	0.00759012
FGF9	hsa-miR-302c-3p.1	high_expressed_in_wm_score_high	high_expressed_in_wm_score_high	PI3K-Akt signaling pathway	0.00759012
FLI1	hsa-miR-371a-5p	high_expressed_in_wm_score_high	low_expressed_in_wm_score_high	Transcriptional misregulation in cancer	0.00812059
FLT1	hsa-miR-302c-3p.1	high_expressed_in_wm_score_high	low_expressed_in_wm_score_high	Transcriptional misregulation in cancer	0.00812059
FLT1	hsa-miR-302a-3p	high_expressed_in_wm_score_high	low_expressed_in_wm_score_high	Transcriptional misregulation in cancer	0.00812059
FLT1	hsa-miR-302d-3p	high_expressed_in_wm_score_high	low_expressed_in_wm_score_high	Transcriptional misregulation in cancer	0.00812059
FLT1	hsa-miR-302b-3p	high_expressed_in_wm_score_high	low_expressed_in_wm_score_high	Transcriptional misregulation in cancer	0.00812059
FLT1	hsa-miR-373-3p	high_expressed_in_wm_score_high	low_expressed_in_wm_score_high	Transcriptional misregulation in cancer	0.00812059
FLT1	hsa-miR-520d-3p	high_expressed_in_wm_score_high	low_expressed_in_wm_score_high	Transcriptional misregulation in cancer	0.00812059
FLT1	hsa-miR-520e	high_expressed_in_wm_score_high	low_expressed_in_wm_score_high	Transcriptional misregulation in cancer	0.00812059
FOXO3	hsa-miR-302a-3p	high_expressed_in_wm_score_high	high_expressed_in_wm_score_high	Neurotrophin signaling pathway	0.0096311
FOXO3	hsa-miR-520d-3p	high_expressed_in_wm_score_high	high_expressed_in_wm_score_high	Neurotrophin signaling pathway	0.0096311
FOXO3	hsa-miR-302c-3p.1	high_expressed_in_wm_score_high	high_expressed_in_wm_score_high	Neurotrophin signaling pathway	0.0096311
FOXO3	hsa-miR-302b-3p	high_expressed_in_wm_score_high	high_expressed_in_wm_score_high	Neurotrophin signaling pathway	0.0096311
FOXO3	hsa-miR-302d-3p	high_expressed_in_wm_score_high	high_expressed_in_wm_score_high	Neurotrophin signaling pathway	0.0096311
FOXO3	hsa-miR-373-3p	high_expressed_in_wm_score_high	high_expressed_in_wm_score_high	Neurotrophin signaling pathway	0.0096311
FOXO3	hsa-miR-520e	high_expressed_in_wm_score_high	high_expressed_in_wm_score_high	Neurotrophin signaling pathway	0.0096311
FOXP1	hsa-miR-520e	high_expressed_in_wm_score_high	high_expressed_in_wm_score_high	MicroRNAs in cancer	0.00421714
FOXP1	hsa-miR-520d-3p	high_expressed_in_wm_score_high	high_expressed_in_wm_score_high	MicroRNAs in cancer	0.00421714
FOXP1	hsa-miR-302d-3p	high_expressed_in_wm_score_high	high_expressed_in_wm_score_high	MicroRNAs in cancer	0.00421714
FOXP1	hsa-miR-302c-3p.1	high_expressed_in_wm_score_high	high_expressed_in_wm_score_high	MicroRNAs in cancer	0.00421714
FOXP1	hsa-miR-373-3p	high_expressed_in_wm_score_high	high_expressed_in_wm_score_high	MicroRNAs in cancer	0.00421714
FOXP1	hsa-miR-302b-3p	high_expressed_in_wm_score_high	high_expressed_in_wm_score_high	MicroRNAs in cancer	0.00421714
FOXP1	hsa-miR-302a-3p	high_expressed_in_wm_score_high	high_expressed_in_wm_score_high	MicroRNAs in cancer	0.00421714
FRS2	hsa-miR-302d-3p	high_expressed_in_wm_score_high	high_expressed_in_wm_score_high	Neurotrophin signaling pathway	0.0096311
FRS2	hsa-miR-520d-3p	high_expressed_in_wm_score_high	high_expressed_in_wm_score_high	Neurotrophin signaling pathway	0.0096311
FRS2	hsa-miR-520e	high_expressed_in_wm_score_high	high_expressed_in_wm_score_high	Neurotrophin signaling pathway	0.0096311
FRS2	hsa-miR-373-3p	high_expressed_in_wm_score_high	high_expressed_in_wm_score_high	Neurotrophin signaling pathway	0.0096311
FRS2	hsa-miR-302c-3p.1	high_expressed_in_wm_score_high	high_expressed_in_wm_score_high	Neurotrophin signaling pathway	0.0096311
FRS2	hsa-miR-302b-3p	high_expressed_in_wm_score_high	high_expressed_in_wm_score_high	Neurotrophin signaling pathway	0.0096311
FRS2	hsa-miR-302a-3p	high_expressed_in_wm_score_high	high_expressed_in_wm_score_high	Neurotrophin signaling pathway	0.0096311
FZD3	hsa-miR-302c-3p.1	high_expressed_in_wm_score_high	high_expressed_in_wm_score_high	Basal cell carcinoma	0.0392676
FZD3	hsa-miR-520d-3p	high_expressed_in_wm_score_high	high_expressed_in_wm_score_high	Basal cell carcinoma	0.0392676
FZD3	hsa-miR-373-3p	high_expressed_in_wm_score_high	high_expressed_in_wm_score_high	Basal cell carcinoma	0.0392676
FZD3	hsa-miR-302d-3p	high_expressed_in_wm_score_high	high_expressed_in_wm_score_high	Basal cell carcinoma	0.0392676
FZD3	hsa-miR-302b-3p	high_expressed_in_wm_score_high	high_expressed_in_wm_score_high	Basal cell carcinoma	0.0392676
FZD3	hsa-miR-302a-3p	high_expressed_in_wm_score_high	high_expressed_in_wm_score_high	Basal cell carcinoma	0.0392676
FZD3	hsa-miR-520e	high_expressed_in_wm_score_high	high_expressed_in_wm_score_high	Basal cell carcinoma	0.0392676
FZD6	hsa-miR-520e	high_expressed_in_wm_score_high	high_expressed_in_wm_score_high	Basal cell carcinoma	0.0392676
FZD6	hsa-miR-520d-3p	high_expressed_in_wm_score_high	high_expressed_in_wm_score_high	Basal cell carcinoma	0.0392676
FZD6	hsa-miR-302d-3p	high_expressed_in_wm_score_high	high_expressed_in_wm_score_high	Basal cell carcinoma	0.0392676
FZD6	hsa-miR-373-3p	high_expressed_in_wm_score_high	high_expressed_in_wm_score_high	Basal cell carcinoma	0.0392676
FZD6	hsa-miR-302a-3p	high_expressed_in_wm_score_high	high_expressed_in_wm_score_high	Basal cell carcinoma	0.0392676
FZD6	hsa-miR-302c-3p.1	high_expressed_in_wm_score_high	high_expressed_in_wm_score_high	Basal cell carcinoma	0.0392676
FZD6	hsa-miR-302b-3p	high_expressed_in_wm_score_high	high_expressed_in_wm_score_high	Basal cell carcinoma	0.0392676
GAB2	hsa-miR-302c-3p.1	high_expressed_in_wm_score_high	low_expressed_in_wm_score_high	Chronic myeloid leukemia	0.00452153
GAB2	hsa-miR-302b-3p	high_expressed_in_wm_score_high	low_expressed_in_wm_score_high	Chronic myeloid leukemia	0.00452153
GAB2	hsa-miR-302a-3p	high_expressed_in_wm_score_high	low_expressed_in_wm_score_high	Chronic myeloid leukemia	0.00452153
GAB2	hsa-miR-373-3p	high_expressed_in_wm_score_high	low_expressed_in_wm_score_high	Chronic myeloid leukemia	0.00452153
GAB2	hsa-miR-520d-3p	high_expressed_in_wm_score_high	low_expressed_in_wm_score_high	Chronic myeloid leukemia	0.00452153
GAB2	hsa-miR-520e	high_expressed_in_wm_score_high	low_expressed_in_wm_score_high	Chronic myeloid leukemia	0.00452153
GAB2	hsa-miR-302d-3p	high_expressed_in_wm_score_high	low_expressed_in_wm_score_high	Chronic myeloid leukemia	0.00452153
GNB5	hsa-miR-520d-3p	high_expressed_in_wm_score_high	low_expressed_in_wm_score_high	PI3K-Akt signaling pathway	0.00759012
GNB5	hsa-miR-302c-3p.1	high_expressed_in_wm_score_high	low_expressed_in_wm_score_high	PI3K-Akt signaling pathway	0.00759012
GNB5	hsa-miR-302a-3p	high_expressed_in_wm_score_high	low_expressed_in_wm_score_high	PI3K-Akt signaling pathway	0.00759012
GNB5	hsa-miR-520e	high_expressed_in_wm_score_high	low_expressed_in_wm_score_high	PI3K-Akt signaling pathway	0.00759012
GNB5	hsa-miR-302d-3p	high_expressed_in_wm_score_high	low_expressed_in_wm_score_high	PI3K-Akt signaling pathway	0.00759012
GNB5	hsa-miR-302b-3p	high_expressed_in_wm_score_high	low_expressed_in_wm_score_high	PI3K-Akt signaling pathway	0.00759012
GNB5	hsa-miR-373-3p	high_expressed_in_wm_score_high	low_expressed_in_wm_score_high	PI3K-Akt signaling pathway	0.00759012
GPR161	hsa-miR-520e	high_expressed_in_wm_score_high	high_expressed_in_wm_score_high	Hedgehog signaling pathway	0.0175415
GPR161	hsa-miR-520d-3p	high_expressed_in_wm_score_high	high_expressed_in_wm_score_high	Hedgehog signaling pathway	0.0175415
GPR161	hsa-miR-302c-3p.1	high_expressed_in_wm_score_high	high_expressed_in_wm_score_high	Hedgehog signaling pathway	0.0175415
GPR161	hsa-miR-302b-3p	high_expressed_in_wm_score_high	high_expressed_in_wm_score_high	Hedgehog signaling pathway	0.0175415
GPR161	hsa-miR-302a-3p	high_expressed_in_wm_score_high	high_expressed_in_wm_score_high	Hedgehog signaling pathway	0.0175415
GPR161	hsa-miR-302d-3p	high_expressed_in_wm_score_high	high_expressed_in_wm_score_high	Hedgehog signaling pathway	0.0175415
GPR161	hsa-miR-373-3p	high_expressed_in_wm_score_high	high_expressed_in_wm_score_high	Hedgehog signaling pathway	0.0175415
HDAC1	hsa-miR-371a-5p	high_expressed_in_wm_score_high	high_expressed_in_wm_score_high	Transcriptional misregulation in cancer	0.00812059
HDAC4	hsa-miR-520d-3p	high_expressed_in_wm_score_high	high_expressed_in_wm_score_high	MicroRNAs in cancer	0.00421714
HDAC4	hsa-miR-520e	high_expressed_in_wm_score_high	high_expressed_in_wm_score_high	MicroRNAs in cancer	0.00421714
HDAC4	hsa-miR-302c-3p.1	high_expressed_in_wm_score_high	high_expressed_in_wm_score_high	MicroRNAs in cancer	0.00421714
HDAC4	hsa-miR-373-3p	high_expressed_in_wm_score_high	high_expressed_in_wm_score_high	MicroRNAs in cancer	0.00421714
HDAC4	hsa-miR-302d-3p	high_expressed_in_wm_score_high	high_expressed_in_wm_score_high	MicroRNAs in cancer	0.00421714
HDAC4	hsa-miR-302a-3p	high_expressed_in_wm_score_high	high_expressed_in_wm_score_high	MicroRNAs in cancer	0.00421714
HDAC4	hsa-miR-302b-3p	high_expressed_in_wm_score_high	high_expressed_in_wm_score_high	MicroRNAs in cancer	0.00421714
HDAC4	hsa-miR-302d-3p	high_expressed_in_wm_score_high	high_expressed_in_wm_score_high	MicroRNAs in cancer	0.00421714
HDAC4	hsa-miR-302c-3p.1	high_expressed_in_wm_score_high	high_expressed_in_wm_score_high	MicroRNAs in cancer	0.00421714
HDAC4	hsa-miR-373-3p	high_expressed_in_wm_score_high	high_expressed_in_wm_score_high	MicroRNAs in cancer	0.00421714
HDAC4	hsa-miR-302b-3p	high_expressed_in_wm_score_high	high_expressed_in_wm_score_high	MicroRNAs in cancer	0.00421714
HDAC4	hsa-miR-302a-3p	high_expressed_in_wm_score_high	high_expressed_in_wm_score_high	MicroRNAs in cancer	0.00421714
HDAC4	hsa-miR-520e	high_expressed_in_wm_score_high	high_expressed_in_wm_score_high	MicroRNAs in cancer	0.00421714
HDAC4	hsa-miR-520d-3p	high_expressed_in_wm_score_high	high_expressed_in_wm_score_high	MicroRNAs in cancer	0.00421714
HIPK3	hsa-miR-520e	high_expressed_in_wm_score_high	low_expressed_in_wm_score_high	Cellular senescence	0.00471919
HIPK3	hsa-miR-520d-3p	high_expressed_in_wm_score_high	low_expressed_in_wm_score_high	Cellular senescence	0.00471919
HIPK3	hsa-miR-302c-3p.1	high_expressed_in_wm_score_high	low_expressed_in_wm_score_high	Cellular senescence	0.00471919
HIPK3	hsa-miR-373-3p	high_expressed_in_wm_score_high	low_expressed_in_wm_score_high	Cellular senescence	0.00471919
HIPK3	hsa-miR-302d-3p	high_expressed_in_wm_score_high	low_expressed_in_wm_score_high	Cellular senescence	0.00471919
HIPK3	hsa-miR-302b-3p	high_expressed_in_wm_score_high	low_expressed_in_wm_score_high	Cellular senescence	0.00471919
HIPK3	hsa-miR-302a-3p	high_expressed_in_wm_score_high	low_expressed_in_wm_score_high	Cellular senescence	0.00471919
HSPA2	hsa-miR-371a-5p	high_expressed_in_wm_score_high	high_expressed_in_wm_score_high	Protein processing in endoplasmic reticulum	0.0170927
HSPA4L	hsa-miR-302d-3p	high_expressed_in_wm_score_high	low_expressed_in_wm_score_high	Protein processing in endoplasmic reticulum	0.0170927
HSPA4L	hsa-miR-302c-3p.1	high_expressed_in_wm_score_high	low_expressed_in_wm_score_high	Protein processing in endoplasmic reticulum	0.0170927
HSPA4L	hsa-miR-302b-3p	high_expressed_in_wm_score_high	low_expressed_in_wm_score_high	Protein processing in endoplasmic reticulum	0.0170927
HSPA4L	hsa-miR-302a-3p	high_expressed_in_wm_score_high	low_expressed_in_wm_score_high	Protein processing in endoplasmic reticulum	0.0170927
HSPA4L	hsa-miR-520e	high_expressed_in_wm_score_high	low_expressed_in_wm_score_high	Protein processing in endoplasmic reticulum	0.0170927
HSPA4L	hsa-miR-520d-3p	high_expressed_in_wm_score_high	low_expressed_in_wm_score_high	Protein processing in endoplasmic reticulum	0.0170927
HSPA4L	hsa-miR-373-3p	high_expressed_in_wm_score_high	low_expressed_in_wm_score_high	Protein processing in endoplasmic reticulum	0.0170927
IGF2BP1	hsa-miR-302a-3p	high_expressed_in_wm_score_high	high_expressed_in_wm_score_high	MicroRNAs in cancer	0.00421714
IGF2BP1	hsa-miR-520e	high_expressed_in_wm_score_high	high_expressed_in_wm_score_high	MicroRNAs in cancer	0.00421714
IGF2BP1	hsa-miR-302b-3p	high_expressed_in_wm_score_high	high_expressed_in_wm_score_high	MicroRNAs in cancer	0.00421714
IGF2BP1	hsa-miR-520d-3p	high_expressed_in_wm_score_high	high_expressed_in_wm_score_high	MicroRNAs in cancer	0.00421714
IGF2BP1	hsa-miR-373-3p	high_expressed_in_wm_score_high	high_expressed_in_wm_score_high	MicroRNAs in cancer	0.00421714
IGF2BP1	hsa-miR-302c-3p.1	high_expressed_in_wm_score_high	high_expressed_in_wm_score_high	MicroRNAs in cancer	0.00421714
IGF2BP1	hsa-miR-302d-3p	high_expressed_in_wm_score_high	high_expressed_in_wm_score_high	MicroRNAs in cancer	0.00421714
INHBA	hsa-miR-520e	high_expressed_in_wm_score_high	low_expressed_in_wm_score_high	Signaling pathways regulating pluripotency of stem cells	0.00108506
INHBA	hsa-miR-520d-3p	high_expressed_in_wm_score_high	low_expressed_in_wm_score_high	Signaling pathways regulating pluripotency of stem cells	0.00108506
INHBA	hsa-miR-373-3p	high_expressed_in_wm_score_high	low_expressed_in_wm_score_high	Signaling pathways regulating pluripotency of stem cells	0.00108506
INHBA	hsa-miR-302b-3p	high_expressed_in_wm_score_high	low_expressed_in_wm_score_high	Signaling pathways regulating pluripotency of stem cells	0.00108506
INHBA	hsa-miR-302a-3p	high_expressed_in_wm_score_high	low_expressed_in_wm_score_high	Signaling pathways regulating pluripotency of stem cells	0.00108506
INHBA	hsa-miR-302c-3p.1	high_expressed_in_wm_score_high	low_expressed_in_wm_score_high	Signaling pathways regulating pluripotency of stem cells	0.00108506
INHBA	hsa-miR-302d-3p	high_expressed_in_wm_score_high	low_expressed_in_wm_score_high	Signaling pathways regulating pluripotency of stem cells	0.00108506
INHBA	hsa-miR-520e	high_expressed_in_wm_score_high	low_expressed_in_wm_score_high	Signaling pathways regulating pluripotency of stem cells	0.00108506
INHBA	hsa-miR-520d-3p	high_expressed_in_wm_score_high	low_expressed_in_wm_score_high	Signaling pathways regulating pluripotency of stem cells	0.00108506
INHBA	hsa-miR-373-3p	high_expressed_in_wm_score_high	low_expressed_in_wm_score_high	Signaling pathways regulating pluripotency of stem cells	0.00108506
INHBA	hsa-miR-302a-3p	high_expressed_in_wm_score_high	low_expressed_in_wm_score_high	Signaling pathways regulating pluripotency of stem cells	0.00108506
INHBA	hsa-miR-302b-3p	high_expressed_in_wm_score_high	low_expressed_in_wm_score_high	Signaling pathways regulating pluripotency of stem cells	0.00108506
INHBA	hsa-miR-302d-3p	high_expressed_in_wm_score_high	low_expressed_in_wm_score_high	Signaling pathways regulating pluripotency of stem cells	0.00108506
INHBA	hsa-miR-302c-3p.1	high_expressed_in_wm_score_high	low_expressed_in_wm_score_high	Signaling pathways regulating pluripotency of stem cells	0.00108506
INHBB	hsa-miR-520e	high_expressed_in_wm_score_high	high_expressed_in_wm_score_high	Signaling pathways regulating pluripotency of stem cells	0.00108506
INHBB	hsa-miR-373-3p	high_expressed_in_wm_score_high	high_expressed_in_wm_score_high	Signaling pathways regulating pluripotency of stem cells	0.00108506
INHBB	hsa-miR-520d-3p	high_expressed_in_wm_score_high	high_expressed_in_wm_score_high	Signaling pathways regulating pluripotency of stem cells	0.00108506
INHBB	hsa-miR-302d-3p	high_expressed_in_wm_score_high	high_expressed_in_wm_score_high	Signaling pathways regulating pluripotency of stem cells	0.00108506
INHBB	hsa-miR-302b-3p	high_expressed_in_wm_score_high	high_expressed_in_wm_score_high	Signaling pathways regulating pluripotency of stem cells	0.00108506
INHBB	hsa-miR-302c-3p.1	high_expressed_in_wm_score_high	high_expressed_in_wm_score_high	Signaling pathways regulating pluripotency of stem cells	0.00108506
INHBB	hsa-miR-302a-3p	high_expressed_in_wm_score_high	high_expressed_in_wm_score_high	Signaling pathways regulating pluripotency of stem cells	0.00108506
INHBB	hsa-miR-373-3p	high_expressed_in_wm_score_high	high_expressed_in_wm_score_high	Signaling pathways regulating pluripotency of stem cells	0.00108506
INHBB	hsa-miR-302a-3p	high_expressed_in_wm_score_high	high_expressed_in_wm_score_high	Signaling pathways regulating pluripotency of stem cells	0.00108506
INHBB	hsa-miR-302b-3p	high_expressed_in_wm_score_high	high_expressed_in_wm_score_high	Signaling pathways regulating pluripotency of stem cells	0.00108506
INHBB	hsa-miR-520e	high_expressed_in_wm_score_high	high_expressed_in_wm_score_high	Signaling pathways regulating pluripotency of stem cells	0.00108506
INHBB	hsa-miR-520d-3p	high_expressed_in_wm_score_high	high_expressed_in_wm_score_high	Signaling pathways regulating pluripotency of stem cells	0.00108506
INHBB	hsa-miR-302d-3p	high_expressed_in_wm_score_high	high_expressed_in_wm_score_high	Signaling pathways regulating pluripotency of stem cells	0.00108506
INHBB	hsa-miR-302c-3p.1	high_expressed_in_wm_score_high	high_expressed_in_wm_score_high	Signaling pathways regulating pluripotency of stem cells	0.00108506
IRAK2	hsa-miR-520e	high_expressed_in_wm_score_high	high_expressed_in_wm_score_high	Neurotrophin signaling pathway	0.0096311
IRAK2	hsa-miR-520d-3p	high_expressed_in_wm_score_high	high_expressed_in_wm_score_high	Neurotrophin signaling pathway	0.0096311
IRAK2	hsa-miR-373-3p	high_expressed_in_wm_score_high	high_expressed_in_wm_score_high	Neurotrophin signaling pathway	0.0096311
IRAK2	hsa-miR-302c-3p.1	high_expressed_in_wm_score_high	high_expressed_in_wm_score_high	Neurotrophin signaling pathway	0.0096311
IRAK2	hsa-miR-302d-3p	high_expressed_in_wm_score_high	high_expressed_in_wm_score_high	Neurotrophin signaling pathway	0.0096311
IRAK2	hsa-miR-302b-3p	high_expressed_in_wm_score_high	high_expressed_in_wm_score_high	Neurotrophin signaling pathway	0.0096311
IRAK2	hsa-miR-302a-3p	high_expressed_in_wm_score_high	high_expressed_in_wm_score_high	Neurotrophin signaling pathway	0.0096311
IRF9	hsa-miR-302b-3p	high_expressed_in_wm_score_high	low_expressed_in_wm_score_high	Human papillomavirus infection	0.00764861
IRF9	hsa-miR-302c-3p.1	high_expressed_in_wm_score_high	low_expressed_in_wm_score_high	Human papillomavirus infection	0.00764861
IRF9	hsa-miR-302a-3p	high_expressed_in_wm_score_high	low_expressed_in_wm_score_high	Human papillomavirus infection	0.00764861
IRF9	hsa-miR-302d-3p	high_expressed_in_wm_score_high	low_expressed_in_wm_score_high	Human papillomavirus infection	0.00764861
IRF9	hsa-miR-373-3p	high_expressed_in_wm_score_high	low_expressed_in_wm_score_high	Human papillomavirus infection	0.00764861
IRF9	hsa-miR-520d-3p	high_expressed_in_wm_score_high	low_expressed_in_wm_score_high	Human papillomavirus infection	0.00764861
IRF9	hsa-miR-520e	high_expressed_in_wm_score_high	low_expressed_in_wm_score_high	Human papillomavirus infection	0.00764861
ITGA2	hsa-miR-302a-3p	high_expressed_in_wm_score_high	high_expressed_in_wm_score_high	Focal adhesion	0.00764861
ITGA2	hsa-miR-302d-3p	high_expressed_in_wm_score_high	high_expressed_in_wm_score_high	Focal adhesion	0.00764861
ITGA2	hsa-miR-302c-3p.1	high_expressed_in_wm_score_high	high_expressed_in_wm_score_high	Focal adhesion	0.00764861
ITGA2	hsa-miR-302b-3p	high_expressed_in_wm_score_high	high_expressed_in_wm_score_high	Focal adhesion	0.00764861
ITGA2	hsa-miR-373-3p	high_expressed_in_wm_score_high	high_expressed_in_wm_score_high	Focal adhesion	0.00764861
ITGA2	hsa-miR-520d-3p	high_expressed_in_wm_score_high	high_expressed_in_wm_score_high	Focal adhesion	0.00764861
ITGA2	hsa-miR-520e	high_expressed_in_wm_score_high	high_expressed_in_wm_score_high	Focal adhesion	0.00764861
ITGB3	hsa-miR-302c-3p.1	high_expressed_in_wm_score_high	low_expressed_in_wm_score_high	Focal adhesion	0.00764861
ITGB3	hsa-miR-520d-3p	high_expressed_in_wm_score_high	low_expressed_in_wm_score_high	Focal adhesion	0.00764861
ITGB3	hsa-miR-373-3p	high_expressed_in_wm_score_high	low_expressed_in_wm_score_high	Focal adhesion	0.00764861
ITGB3	hsa-miR-302d-3p	high_expressed_in_wm_score_high	low_expressed_in_wm_score_high	Focal adhesion	0.00764861
ITGB3	hsa-miR-302b-3p	high_expressed_in_wm_score_high	low_expressed_in_wm_score_high	Focal adhesion	0.00764861
ITGB3	hsa-miR-302a-3p	high_expressed_in_wm_score_high	low_expressed_in_wm_score_high	Focal adhesion	0.00764861
ITGB3	hsa-miR-520e	high_expressed_in_wm_score_high	low_expressed_in_wm_score_high	Focal adhesion	0.00764861
ITGB4	hsa-miR-520e	high_expressed_in_wm_score_high	high_expressed_in_wm_score_high	Focal adhesion	0.00764861
ITGB4	hsa-miR-302c-3p.1	high_expressed_in_wm_score_high	high_expressed_in_wm_score_high	Focal adhesion	0.00764861
ITGB4	hsa-miR-302d-3p	high_expressed_in_wm_score_high	high_expressed_in_wm_score_high	Focal adhesion	0.00764861
ITGB4	hsa-miR-373-3p	high_expressed_in_wm_score_high	high_expressed_in_wm_score_high	Focal adhesion	0.00764861
ITGB4	hsa-miR-520d-3p	high_expressed_in_wm_score_high	high_expressed_in_wm_score_high	Focal adhesion	0.00764861
ITGB4	hsa-miR-302b-3p	high_expressed_in_wm_score_high	high_expressed_in_wm_score_high	Focal adhesion	0.00764861
ITGB4	hsa-miR-302a-3p	high_expressed_in_wm_score_high	high_expressed_in_wm_score_high	Focal adhesion	0.00764861
ITGB8	hsa-miR-371a-5p	high_expressed_in_wm_score_high	high_expressed_in_wm_score_high	Focal adhesion	0.00764861
ITGB8	hsa-miR-373-3p	high_expressed_in_wm_score_high	high_expressed_in_wm_score_high	Focal adhesion	0.00764861
ITGB8	hsa-miR-302b-3p	high_expressed_in_wm_score_high	high_expressed_in_wm_score_high	Focal adhesion	0.00764861
ITGB8	hsa-miR-302c-3p.1	high_expressed_in_wm_score_high	high_expressed_in_wm_score_high	Focal adhesion	0.00764861
ITGB8	hsa-miR-302d-3p	high_expressed_in_wm_score_high	high_expressed_in_wm_score_high	Focal adhesion	0.00764861
ITGB8	hsa-miR-520d-3p	high_expressed_in_wm_score_high	high_expressed_in_wm_score_high	Focal adhesion	0.00764861
ITGB8	hsa-miR-302a-3p	high_expressed_in_wm_score_high	high_expressed_in_wm_score_high	Focal adhesion	0.00764861
ITGB8	hsa-miR-520e	high_expressed_in_wm_score_high	high_expressed_in_wm_score_high	Focal adhesion	0.00764861
KAT2B	hsa-miR-302c-3p.1	high_expressed_in_wm_score_high	low_expressed_in_wm_score_high	Human T-cell leukemia virus 1 infection	0.0175415
KAT2B	hsa-miR-520e	high_expressed_in_wm_score_high	low_expressed_in_wm_score_high	Human T-cell leukemia virus 1 infection	0.0175415
KAT2B	hsa-miR-520d-3p	high_expressed_in_wm_score_high	low_expressed_in_wm_score_high	Human T-cell leukemia virus 1 infection	0.0175415
KAT2B	hsa-miR-373-3p	high_expressed_in_wm_score_high	low_expressed_in_wm_score_high	Human T-cell leukemia virus 1 infection	0.0175415
KAT2B	hsa-miR-302d-3p	high_expressed_in_wm_score_high	low_expressed_in_wm_score_high	Human T-cell leukemia virus 1 infection	0.0175415
KAT2B	hsa-miR-302a-3p	high_expressed_in_wm_score_high	low_expressed_in_wm_score_high	Human T-cell leukemia virus 1 infection	0.0175415
KAT2B	hsa-miR-302b-3p	high_expressed_in_wm_score_high	low_expressed_in_wm_score_high	Human T-cell leukemia virus 1 infection	0.0175415
KAT6A	hsa-miR-373-3p	high_expressed_in_wm_score_high	high_expressed_in_wm_score_high	Signaling pathways regulating pluripotency of stem cells	0.00108506
KAT6A	hsa-miR-520e	high_expressed_in_wm_score_high	high_expressed_in_wm_score_high	Signaling pathways regulating pluripotency of stem cells	0.00108506
KAT6A	hsa-miR-302a-3p	high_expressed_in_wm_score_high	high_expressed_in_wm_score_high	Signaling pathways regulating pluripotency of stem cells	0.00108506
KAT6A	hsa-miR-302b-3p	high_expressed_in_wm_score_high	high_expressed_in_wm_score_high	Signaling pathways regulating pluripotency of stem cells	0.00108506
KAT6A	hsa-miR-302c-3p.1	high_expressed_in_wm_score_high	high_expressed_in_wm_score_high	Signaling pathways regulating pluripotency of stem cells	0.00108506
KAT6A	hsa-miR-520d-3p	high_expressed_in_wm_score_high	high_expressed_in_wm_score_high	Signaling pathways regulating pluripotency of stem cells	0.00108506
KAT6A	hsa-miR-302d-3p	high_expressed_in_wm_score_high	high_expressed_in_wm_score_high	Signaling pathways regulating pluripotency of stem cells	0.00108506
KDM6A	hsa-miR-371a-5p	high_expressed_in_wm_score_high	high_expressed_in_wm_score_high	Transcriptional misregulation in cancer	0.00812059
KLF3	hsa-miR-302b-3p	high_expressed_in_wm_score_high	high_expressed_in_wm_score_high	Transcriptional misregulation in cancer	0.00812059
KLF3	hsa-miR-302a-3p	high_expressed_in_wm_score_high	high_expressed_in_wm_score_high	Transcriptional misregulation in cancer	0.00812059
KLF3	hsa-miR-373-3p	high_expressed_in_wm_score_high	high_expressed_in_wm_score_high	Transcriptional misregulation in cancer	0.00812059
KLF3	hsa-miR-302d-3p	high_expressed_in_wm_score_high	high_expressed_in_wm_score_high	Transcriptional misregulation in cancer	0.00812059
KLF3	hsa-miR-302c-3p.1	high_expressed_in_wm_score_high	high_expressed_in_wm_score_high	Transcriptional misregulation in cancer	0.00812059
KLF3	hsa-miR-520e	high_expressed_in_wm_score_high	high_expressed_in_wm_score_high	Transcriptional misregulation in cancer	0.00812059
KLF3	hsa-miR-520d-3p	high_expressed_in_wm_score_high	high_expressed_in_wm_score_high	Transcriptional misregulation in cancer	0.00812059
KMT2A	hsa-miR-302d-3p	high_expressed_in_wm_score_high	high_expressed_in_wm_score_high	Transcriptional misregulation in cancer	0.00812059
KMT2A	hsa-miR-302c-3p.1	high_expressed_in_wm_score_high	high_expressed_in_wm_score_high	Transcriptional misregulation in cancer	0.00812059
KMT2A	hsa-miR-520e	high_expressed_in_wm_score_high	high_expressed_in_wm_score_high	Transcriptional misregulation in cancer	0.00812059
KMT2A	hsa-miR-302a-3p	high_expressed_in_wm_score_high	high_expressed_in_wm_score_high	Transcriptional misregulation in cancer	0.00812059
KMT2A	hsa-miR-302b-3p	high_expressed_in_wm_score_high	high_expressed_in_wm_score_high	Transcriptional misregulation in cancer	0.00812059
KMT2A	hsa-miR-373-3p	high_expressed_in_wm_score_high	high_expressed_in_wm_score_high	Transcriptional misregulation in cancer	0.00812059
KMT2A	hsa-miR-520d-3p	high_expressed_in_wm_score_high	high_expressed_in_wm_score_high	Transcriptional misregulation in cancer	0.00812059
KMT2A	hsa-miR-302a-3p	high_expressed_in_wm_score_high	high_expressed_in_wm_score_high	Transcriptional misregulation in cancer	0.00812059
KMT2A	hsa-miR-302b-3p	high_expressed_in_wm_score_high	high_expressed_in_wm_score_high	Transcriptional misregulation in cancer	0.00812059
KMT2A	hsa-miR-302c-3p.1	high_expressed_in_wm_score_high	high_expressed_in_wm_score_high	Transcriptional misregulation in cancer	0.00812059
KMT2A	hsa-miR-373-3p	high_expressed_in_wm_score_high	high_expressed_in_wm_score_high	Transcriptional misregulation in cancer	0.00812059
KMT2A	hsa-miR-302d-3p	high_expressed_in_wm_score_high	high_expressed_in_wm_score_high	Transcriptional misregulation in cancer	0.00812059
KMT2A	hsa-miR-520e	high_expressed_in_wm_score_high	high_expressed_in_wm_score_high	Transcriptional misregulation in cancer	0.00812059
KMT2A	hsa-miR-520d-3p	high_expressed_in_wm_score_high	high_expressed_in_wm_score_high	Transcriptional misregulation in cancer	0.00812059
KMT2D	hsa-miR-371a-5p	high_expressed_in_wm_score_high	high_expressed_in_wm_score_high	Cushing syndrome	0.00759012
LAMA3	hsa-miR-373-3p	high_expressed_in_wm_score_high	low_expressed_in_wm_score_high	Focal adhesion	0.00764861
LAMA3	hsa-miR-302c-3p.1	high_expressed_in_wm_score_high	low_expressed_in_wm_score_high	Focal adhesion	0.00764861
LAMA3	hsa-miR-302b-3p	high_expressed_in_wm_score_high	low_expressed_in_wm_score_high	Focal adhesion	0.00764861
LAMA3	hsa-miR-302a-3p	high_expressed_in_wm_score_high	low_expressed_in_wm_score_high	Focal adhesion	0.00764861
LAMA3	hsa-miR-520d-3p	high_expressed_in_wm_score_high	low_expressed_in_wm_score_high	Focal adhesion	0.00764861
LAMA3	hsa-miR-520e	high_expressed_in_wm_score_high	low_expressed_in_wm_score_high	Focal adhesion	0.00764861
LAMA3	hsa-miR-302d-3p	high_expressed_in_wm_score_high	low_expressed_in_wm_score_high	Focal adhesion	0.00764861
LAMP2	hsa-miR-302b-3p	high_expressed_in_wm_score_high	low_expressed_in_wm_score_high	Autophagy - animal	0.00122306
LAMP2	hsa-miR-302c-3p.1	high_expressed_in_wm_score_high	low_expressed_in_wm_score_high	Autophagy - animal	0.00122306
LAMP2	hsa-miR-302a-3p	high_expressed_in_wm_score_high	low_expressed_in_wm_score_high	Autophagy - animal	0.00122306
LAMP2	hsa-miR-302d-3p	high_expressed_in_wm_score_high	low_expressed_in_wm_score_high	Autophagy - animal	0.00122306
LAMP2	hsa-miR-520e	high_expressed_in_wm_score_high	low_expressed_in_wm_score_high	Autophagy - animal	0.00122306
LAMP2	hsa-miR-373-3p	high_expressed_in_wm_score_high	low_expressed_in_wm_score_high	Autophagy - animal	0.00122306
LAMP2	hsa-miR-520d-3p	high_expressed_in_wm_score_high	low_expressed_in_wm_score_high	Autophagy - animal	0.00122306
LAMTOR3	hsa-miR-371a-5p	high_expressed_in_wm_score_high	low_expressed_in_wm_score_high	MAPK signaling pathway	0.00349373
LATS2	hsa-miR-520e	high_expressed_in_wm_score_high	low_expressed_in_wm_score_high	Hippo signaling pathway	0.00273368
LATS2	hsa-miR-302b-3p	high_expressed_in_wm_score_high	low_expressed_in_wm_score_high	Hippo signaling pathway	0.00273368
LATS2	hsa-miR-520d-3p	high_expressed_in_wm_score_high	low_expressed_in_wm_score_high	Hippo signaling pathway	0.00273368
LATS2	hsa-miR-302d-3p	high_expressed_in_wm_score_high	low_expressed_in_wm_score_high	Hippo signaling pathway	0.00273368
LATS2	hsa-miR-302c-3p.1	high_expressed_in_wm_score_high	low_expressed_in_wm_score_high	Hippo signaling pathway	0.00273368
LATS2	hsa-miR-302a-3p	high_expressed_in_wm_score_high	low_expressed_in_wm_score_high	Hippo signaling pathway	0.00273368
LATS2	hsa-miR-373-3p	high_expressed_in_wm_score_high	low_expressed_in_wm_score_high	Hippo signaling pathway	0.00273368
LATS2	hsa-miR-302b-3p	high_expressed_in_wm_score_high	low_expressed_in_wm_score_high	Hippo signaling pathway	0.00273368
LATS2	hsa-miR-520e	high_expressed_in_wm_score_high	low_expressed_in_wm_score_high	Hippo signaling pathway	0.00273368
LATS2	hsa-miR-302c-3p.1	high_expressed_in_wm_score_high	low_expressed_in_wm_score_high	Hippo signaling pathway	0.00273368
LATS2	hsa-miR-302d-3p	high_expressed_in_wm_score_high	low_expressed_in_wm_score_high	Hippo signaling pathway	0.00273368
LATS2	hsa-miR-302a-3p	high_expressed_in_wm_score_high	low_expressed_in_wm_score_high	Hippo signaling pathway	0.00273368
LATS2	hsa-miR-373-3p	high_expressed_in_wm_score_high	low_expressed_in_wm_score_high	Hippo signaling pathway	0.00273368
LATS2	hsa-miR-520d-3p	high_expressed_in_wm_score_high	low_expressed_in_wm_score_high	Hippo signaling pathway	0.00273368
LDB1	hsa-miR-371a-5p	high_expressed_in_wm_score_high	high_expressed_in_wm_score_high	Transcriptional misregulation in cancer	0.00812059
LEF1	hsa-miR-520e	high_expressed_in_wm_score_high	high_expressed_in_wm_score_high	Basal cell carcinoma	0.0392676
LEF1	hsa-miR-520d-3p	high_expressed_in_wm_score_high	high_expressed_in_wm_score_high	Basal cell carcinoma	0.0392676
LEF1	hsa-miR-302a-3p	high_expressed_in_wm_score_high	high_expressed_in_wm_score_high	Basal cell carcinoma	0.0392676
LEF1	hsa-miR-302b-3p	high_expressed_in_wm_score_high	high_expressed_in_wm_score_high	Basal cell carcinoma	0.0392676
LEF1	hsa-miR-302c-3p.1	high_expressed_in_wm_score_high	high_expressed_in_wm_score_high	Basal cell carcinoma	0.0392676
LEF1	hsa-miR-302d-3p	high_expressed_in_wm_score_high	high_expressed_in_wm_score_high	Basal cell carcinoma	0.0392676
LEF1	hsa-miR-373-3p	high_expressed_in_wm_score_high	high_expressed_in_wm_score_high	Basal cell carcinoma	0.0392676
LEF1	hsa-miR-371a-5p	high_expressed_in_wm_score_high	high_expressed_in_wm_score_high	Basal cell carcinoma	0.0392676
LEFTY1	hsa-miR-302d-3p	high_expressed_in_wm_score_high	high_expressed_in_wm_score_high	Signaling pathways regulating pluripotency of stem cells	0.00108506
LEFTY1	hsa-miR-302c-3p.1	high_expressed_in_wm_score_high	high_expressed_in_wm_score_high	Signaling pathways regulating pluripotency of stem cells	0.00108506
LEFTY1	hsa-miR-302b-3p	high_expressed_in_wm_score_high	high_expressed_in_wm_score_high	Signaling pathways regulating pluripotency of stem cells	0.00108506
LEFTY1	hsa-miR-373-3p	high_expressed_in_wm_score_high	high_expressed_in_wm_score_high	Signaling pathways regulating pluripotency of stem cells	0.00108506
LEFTY1	hsa-miR-520d-3p	high_expressed_in_wm_score_high	high_expressed_in_wm_score_high	Signaling pathways regulating pluripotency of stem cells	0.00108506
LEFTY1	hsa-miR-520e	high_expressed_in_wm_score_high	high_expressed_in_wm_score_high	Signaling pathways regulating pluripotency of stem cells	0.00108506
LEFTY1	hsa-miR-302a-3p	high_expressed_in_wm_score_high	high_expressed_in_wm_score_high	Signaling pathways regulating pluripotency of stem cells	0.00108506
LEFTY2	hsa-miR-302c-3p.1	high_expressed_in_wm_score_high	high_expressed_in_wm_score_high	Signaling pathways regulating pluripotency of stem cells	0.00108506
LEFTY2	hsa-miR-302b-3p	high_expressed_in_wm_score_high	high_expressed_in_wm_score_high	Signaling pathways regulating pluripotency of stem cells	0.00108506
LEFTY2	hsa-miR-373-3p	high_expressed_in_wm_score_high	high_expressed_in_wm_score_high	Signaling pathways regulating pluripotency of stem cells	0.00108506
LEFTY2	hsa-miR-520e	high_expressed_in_wm_score_high	high_expressed_in_wm_score_high	Signaling pathways regulating pluripotency of stem cells	0.00108506
LEFTY2	hsa-miR-302a-3p	high_expressed_in_wm_score_high	high_expressed_in_wm_score_high	Signaling pathways regulating pluripotency of stem cells	0.00108506
LEFTY2	hsa-miR-520d-3p	high_expressed_in_wm_score_high	high_expressed_in_wm_score_high	Signaling pathways regulating pluripotency of stem cells	0.00108506
LEFTY2	hsa-miR-302d-3p	high_expressed_in_wm_score_high	high_expressed_in_wm_score_high	Signaling pathways regulating pluripotency of stem cells	0.00108506
LGR4	hsa-miR-302c-3p.1	high_expressed_in_wm_score_high	low_expressed_in_wm_score_high	Wnt signaling pathway	0.00759012
LGR4	hsa-miR-520e	high_expressed_in_wm_score_high	low_expressed_in_wm_score_high	Wnt signaling pathway	0.00759012
LGR4	hsa-miR-520d-3p	high_expressed_in_wm_score_high	low_expressed_in_wm_score_high	Wnt signaling pathway	0.00759012
LGR4	hsa-miR-302b-3p	high_expressed_in_wm_score_high	low_expressed_in_wm_score_high	Wnt signaling pathway	0.00759012
LGR4	hsa-miR-373-3p	high_expressed_in_wm_score_high	low_expressed_in_wm_score_high	Wnt signaling pathway	0.00759012
LGR4	hsa-miR-302d-3p	high_expressed_in_wm_score_high	low_expressed_in_wm_score_high	Wnt signaling pathway	0.00759012
LGR4	hsa-miR-302a-3p	high_expressed_in_wm_score_high	low_expressed_in_wm_score_high	Wnt signaling pathway	0.00759012
LIF	hsa-miR-302b-3p	high_expressed_in_wm_score_high	high_expressed_in_wm_score_high	Signaling pathways regulating pluripotency of stem cells	0.00108506
LIF	hsa-miR-520d-3p	high_expressed_in_wm_score_high	high_expressed_in_wm_score_high	Signaling pathways regulating pluripotency of stem cells	0.00108506
LIF	hsa-miR-520e	high_expressed_in_wm_score_high	high_expressed_in_wm_score_high	Signaling pathways regulating pluripotency of stem cells	0.00108506
LIF	hsa-miR-373-3p	high_expressed_in_wm_score_high	high_expressed_in_wm_score_high	Signaling pathways regulating pluripotency of stem cells	0.00108506
LIF	hsa-miR-302c-3p.1	high_expressed_in_wm_score_high	high_expressed_in_wm_score_high	Signaling pathways regulating pluripotency of stem cells	0.00108506
LIF	hsa-miR-302d-3p	high_expressed_in_wm_score_high	high_expressed_in_wm_score_high	Signaling pathways regulating pluripotency of stem cells	0.00108506
LIF	hsa-miR-302a-3p	high_expressed_in_wm_score_high	high_expressed_in_wm_score_high	Signaling pathways regulating pluripotency of stem cells	0.00108506
LIN52	hsa-miR-371a-5p	high_expressed_in_wm_score_high	low_expressed_in_wm_score_high	Cellular senescence	0.00471919
LIN52	hsa-miR-520e	high_expressed_in_wm_score_high	low_expressed_in_wm_score_high	Cellular senescence	0.00471919
LIN52	hsa-miR-373-3p	high_expressed_in_wm_score_high	low_expressed_in_wm_score_high	Cellular senescence	0.00471919
LIN52	hsa-miR-302d-3p	high_expressed_in_wm_score_high	low_expressed_in_wm_score_high	Cellular senescence	0.00471919
LIN52	hsa-miR-302c-3p.1	high_expressed_in_wm_score_high	low_expressed_in_wm_score_high	Cellular senescence	0.00471919
LIN52	hsa-miR-302b-3p	high_expressed_in_wm_score_high	low_expressed_in_wm_score_high	Cellular senescence	0.00471919
LIN52	hsa-miR-302a-3p	high_expressed_in_wm_score_high	low_expressed_in_wm_score_high	Cellular senescence	0.00471919
LIN52	hsa-miR-520d-3p	high_expressed_in_wm_score_high	low_expressed_in_wm_score_high	Cellular senescence	0.00471919
LPAR3	hsa-miR-371a-5p	high_expressed_in_wm_score_high	low_expressed_in_wm_score_high	PI3K-Akt signaling pathway	0.00759012
LRRC4C	hsa-miR-373-3p	high_expressed_in_wm_score_high	low_expressed_in_wm_score_high	Axon guidance	0.0170671
LRRC4C	hsa-miR-302b-3p	high_expressed_in_wm_score_high	low_expressed_in_wm_score_high	Axon guidance	0.0170671
LRRC4C	hsa-miR-302a-3p	high_expressed_in_wm_score_high	low_expressed_in_wm_score_high	Axon guidance	0.0170671
LRRC4C	hsa-miR-520d-3p	high_expressed_in_wm_score_high	low_expressed_in_wm_score_high	Axon guidance	0.0170671
LRRC4C	hsa-miR-520e	high_expressed_in_wm_score_high	low_expressed_in_wm_score_high	Axon guidance	0.0170671
LRRC4C	hsa-miR-302d-3p	high_expressed_in_wm_score_high	low_expressed_in_wm_score_high	Axon guidance	0.0170671
LRRC4C	hsa-miR-302c-3p.1	high_expressed_in_wm_score_high	low_expressed_in_wm_score_high	Axon guidance	0.0170671
MAML1	hsa-miR-302c-3p.1	high_expressed_in_wm_score_high	high_expressed_in_wm_score_high	Human papillomavirus infection	0.00764861
MAML1	hsa-miR-520d-3p	high_expressed_in_wm_score_high	high_expressed_in_wm_score_high	Human papillomavirus infection	0.00764861
MAML1	hsa-miR-520e	high_expressed_in_wm_score_high	high_expressed_in_wm_score_high	Human papillomavirus infection	0.00764861
MAML1	hsa-miR-373-3p	high_expressed_in_wm_score_high	high_expressed_in_wm_score_high	Human papillomavirus infection	0.00764861
MAML1	hsa-miR-302d-3p	high_expressed_in_wm_score_high	high_expressed_in_wm_score_high	Human papillomavirus infection	0.00764861
MAML1	hsa-miR-302b-3p	high_expressed_in_wm_score_high	high_expressed_in_wm_score_high	Human papillomavirus infection	0.00764861
MAML1	hsa-miR-302a-3p	high_expressed_in_wm_score_high	high_expressed_in_wm_score_high	Human papillomavirus infection	0.00764861
MAN1A1	hsa-miR-373-3p	high_expressed_in_wm_score_high	low_expressed_in_wm_score_high	Protein processing in endoplasmic reticulum	0.0170927
MAN1A1	hsa-miR-302c-3p.1	high_expressed_in_wm_score_high	low_expressed_in_wm_score_high	Protein processing in endoplasmic reticulum	0.0170927
MAN1A1	hsa-miR-302b-3p	high_expressed_in_wm_score_high	low_expressed_in_wm_score_high	Protein processing in endoplasmic reticulum	0.0170927
MAN1A1	hsa-miR-302a-3p	high_expressed_in_wm_score_high	low_expressed_in_wm_score_high	Protein processing in endoplasmic reticulum	0.0170927
MAN1A1	hsa-miR-520d-3p	high_expressed_in_wm_score_high	low_expressed_in_wm_score_high	Protein processing in endoplasmic reticulum	0.0170927
MAN1A1	hsa-miR-520e	high_expressed_in_wm_score_high	low_expressed_in_wm_score_high	Protein processing in endoplasmic reticulum	0.0170927
MAN1A1	hsa-miR-302d-3p	high_expressed_in_wm_score_high	low_expressed_in_wm_score_high	Protein processing in endoplasmic reticulum	0.0170927
MAP3K1	hsa-miR-302b-3p	high_expressed_in_wm_score_high	high_expressed_in_wm_score_high	Human T-cell leukemia virus 1 infection	0.0175415
MAP3K1	hsa-miR-302a-3p	high_expressed_in_wm_score_high	high_expressed_in_wm_score_high	Human T-cell leukemia virus 1 infection	0.0175415
MAP3K1	hsa-miR-373-3p	high_expressed_in_wm_score_high	high_expressed_in_wm_score_high	Human T-cell leukemia virus 1 infection	0.0175415
MAP3K1	hsa-miR-302c-3p.1	high_expressed_in_wm_score_high	high_expressed_in_wm_score_high	Human T-cell leukemia virus 1 infection	0.0175415
MAP3K1	hsa-miR-302d-3p	high_expressed_in_wm_score_high	high_expressed_in_wm_score_high	Human T-cell leukemia virus 1 infection	0.0175415
MAP3K1	hsa-miR-520d-3p	high_expressed_in_wm_score_high	high_expressed_in_wm_score_high	Human T-cell leukemia virus 1 infection	0.0175415
MAP3K1	hsa-miR-520e	high_expressed_in_wm_score_high	high_expressed_in_wm_score_high	Human T-cell leukemia virus 1 infection	0.0175415
MAP3K1	hsa-miR-371a-5p	high_expressed_in_wm_score_high	high_expressed_in_wm_score_high	Human T-cell leukemia virus 1 infection	0.0175415
MAP3K11	hsa-miR-520d-3p	high_expressed_in_wm_score_high	low_expressed_in_wm_score_high	MAPK signaling pathway	0.00349373
MAP3K11	hsa-miR-520e	high_expressed_in_wm_score_high	low_expressed_in_wm_score_high	MAPK signaling pathway	0.00349373
MAP3K11	hsa-miR-302c-3p.1	high_expressed_in_wm_score_high	low_expressed_in_wm_score_high	MAPK signaling pathway	0.00349373
MAP3K11	hsa-miR-302a-3p	high_expressed_in_wm_score_high	low_expressed_in_wm_score_high	MAPK signaling pathway	0.00349373
MAP3K11	hsa-miR-373-3p	high_expressed_in_wm_score_high	low_expressed_in_wm_score_high	MAPK signaling pathway	0.00349373
MAP3K11	hsa-miR-302d-3p	high_expressed_in_wm_score_high	low_expressed_in_wm_score_high	MAPK signaling pathway	0.00349373
MAP3K11	hsa-miR-302b-3p	high_expressed_in_wm_score_high	low_expressed_in_wm_score_high	MAPK signaling pathway	0.00349373
MAP3K2	hsa-miR-520d-3p	high_expressed_in_wm_score_high	low_expressed_in_wm_score_high	MAPK signaling pathway	0.00349373
MAP3K2	hsa-miR-520e	high_expressed_in_wm_score_high	low_expressed_in_wm_score_high	MAPK signaling pathway	0.00349373
MAP3K2	hsa-miR-302a-3p	high_expressed_in_wm_score_high	low_expressed_in_wm_score_high	MAPK signaling pathway	0.00349373
MAP3K2	hsa-miR-302c-3p.1	high_expressed_in_wm_score_high	low_expressed_in_wm_score_high	MAPK signaling pathway	0.00349373
MAP3K2	hsa-miR-302d-3p	high_expressed_in_wm_score_high	low_expressed_in_wm_score_high	MAPK signaling pathway	0.00349373
MAP3K2	hsa-miR-373-3p	high_expressed_in_wm_score_high	low_expressed_in_wm_score_high	MAPK signaling pathway	0.00349373
MAP3K2	hsa-miR-302b-3p	high_expressed_in_wm_score_high	low_expressed_in_wm_score_high	MAPK signaling pathway	0.00349373
MAP3K2	hsa-miR-520e	high_expressed_in_wm_score_high	low_expressed_in_wm_score_high	MAPK signaling pathway	0.00349373
MAP3K2	hsa-miR-520d-3p	high_expressed_in_wm_score_high	low_expressed_in_wm_score_high	MAPK signaling pathway	0.00349373
MAP3K2	hsa-miR-302a-3p	high_expressed_in_wm_score_high	low_expressed_in_wm_score_high	MAPK signaling pathway	0.00349373
MAP3K2	hsa-miR-302b-3p	high_expressed_in_wm_score_high	low_expressed_in_wm_score_high	MAPK signaling pathway	0.00349373
MAP3K2	hsa-miR-373-3p	high_expressed_in_wm_score_high	low_expressed_in_wm_score_high	MAPK signaling pathway	0.00349373
MAP3K2	hsa-miR-302c-3p.1	high_expressed_in_wm_score_high	low_expressed_in_wm_score_high	MAPK signaling pathway	0.00349373
MAP3K2	hsa-miR-302d-3p	high_expressed_in_wm_score_high	low_expressed_in_wm_score_high	MAPK signaling pathway	0.00349373
MARCKS	hsa-miR-371a-5p	high_expressed_in_wm_score_high	high_expressed_in_wm_score_high	MicroRNAs in cancer	0.00421714
MARCKS	hsa-miR-371a-5p	high_expressed_in_wm_score_high	high_expressed_in_wm_score_high	MicroRNAs in cancer	0.00421714
MCL1	hsa-miR-373-3p	high_expressed_in_wm_score_high	high_expressed_in_wm_score_high	PI3K-Akt signaling pathway	0.00759012
MCL1	hsa-miR-302a-3p	high_expressed_in_wm_score_high	high_expressed_in_wm_score_high	PI3K-Akt signaling pathway	0.00759012
MCL1	hsa-miR-302d-3p	high_expressed_in_wm_score_high	high_expressed_in_wm_score_high	PI3K-Akt signaling pathway	0.00759012
MCL1	hsa-miR-302b-3p	high_expressed_in_wm_score_high	high_expressed_in_wm_score_high	PI3K-Akt signaling pathway	0.00759012
MCL1	hsa-miR-520d-3p	high_expressed_in_wm_score_high	high_expressed_in_wm_score_high	PI3K-Akt signaling pathway	0.00759012
MCL1	hsa-miR-520e	high_expressed_in_wm_score_high	high_expressed_in_wm_score_high	PI3K-Akt signaling pathway	0.00759012
MCL1	hsa-miR-302c-3p.1	high_expressed_in_wm_score_high	high_expressed_in_wm_score_high	PI3K-Akt signaling pathway	0.00759012
MCM3	hsa-miR-373-3p	high_expressed_in_wm_score_high	high_expressed_in_wm_score_high	Cell cycle	0.000545759
MCM3	hsa-miR-520d-3p	high_expressed_in_wm_score_high	high_expressed_in_wm_score_high	Cell cycle	0.000545759
MCM3	hsa-miR-520e	high_expressed_in_wm_score_high	high_expressed_in_wm_score_high	Cell cycle	0.000545759
MCM3	hsa-miR-302d-3p	high_expressed_in_wm_score_high	high_expressed_in_wm_score_high	Cell cycle	0.000545759
MCM3	hsa-miR-302c-3p.1	high_expressed_in_wm_score_high	high_expressed_in_wm_score_high	Cell cycle	0.000545759
MCM3	hsa-miR-302b-3p	high_expressed_in_wm_score_high	high_expressed_in_wm_score_high	Cell cycle	0.000545759
MCM3	hsa-miR-302a-3p	high_expressed_in_wm_score_high	high_expressed_in_wm_score_high	Cell cycle	0.000545759
MEF2C	hsa-miR-302c-3p.1	high_expressed_in_wm_score_high	low_expressed_in_wm_score_high	Transcriptional misregulation in cancer	0.00812059
MEF2C	hsa-miR-520e	high_expressed_in_wm_score_high	low_expressed_in_wm_score_high	Transcriptional misregulation in cancer	0.00812059
MEF2C	hsa-miR-520d-3p	high_expressed_in_wm_score_high	low_expressed_in_wm_score_high	Transcriptional misregulation in cancer	0.00812059
MEF2C	hsa-miR-373-3p	high_expressed_in_wm_score_high	low_expressed_in_wm_score_high	Transcriptional misregulation in cancer	0.00812059
MEF2C	hsa-miR-302d-3p	high_expressed_in_wm_score_high	low_expressed_in_wm_score_high	Transcriptional misregulation in cancer	0.00812059
MEF2C	hsa-miR-302a-3p	high_expressed_in_wm_score_high	low_expressed_in_wm_score_high	Transcriptional misregulation in cancer	0.00812059
MEF2C	hsa-miR-302b-3p	high_expressed_in_wm_score_high	low_expressed_in_wm_score_high	Transcriptional misregulation in cancer	0.00812059
MKNK2	hsa-miR-302d-3p	high_expressed_in_wm_score_high	low_expressed_in_wm_score_high	MAPK signaling pathway	0.00349373
MKNK2	hsa-miR-302c-3p.1	high_expressed_in_wm_score_high	low_expressed_in_wm_score_high	MAPK signaling pathway	0.00349373
MKNK2	hsa-miR-302b-3p	high_expressed_in_wm_score_high	low_expressed_in_wm_score_high	MAPK signaling pathway	0.00349373
MKNK2	hsa-miR-302a-3p	high_expressed_in_wm_score_high	low_expressed_in_wm_score_high	MAPK signaling pathway	0.00349373
MKNK2	hsa-miR-520e	high_expressed_in_wm_score_high	low_expressed_in_wm_score_high	MAPK signaling pathway	0.00349373
MKNK2	hsa-miR-520d-3p	high_expressed_in_wm_score_high	low_expressed_in_wm_score_high	MAPK signaling pathway	0.00349373
MKNK2	hsa-miR-373-3p	high_expressed_in_wm_score_high	low_expressed_in_wm_score_high	MAPK signaling pathway	0.00349373
MMP16	hsa-miR-371a-5p	high_expressed_in_wm_score_high	high_expressed_in_wm_score_high	MicroRNAs in cancer	0.00421714
MPP5	hsa-miR-302a-3p	high_expressed_in_wm_score_high	low_expressed_in_wm_score_high	Human papillomavirus infection	0.00764861
MPP5	hsa-miR-373-3p	high_expressed_in_wm_score_high	low_expressed_in_wm_score_high	Human papillomavirus infection	0.00764861
MPP5	hsa-miR-302d-3p	high_expressed_in_wm_score_high	low_expressed_in_wm_score_high	Human papillomavirus infection	0.00764861
MPP5	hsa-miR-520d-3p	high_expressed_in_wm_score_high	low_expressed_in_wm_score_high	Human papillomavirus infection	0.00764861
MPP5	hsa-miR-302c-3p.1	high_expressed_in_wm_score_high	low_expressed_in_wm_score_high	Human papillomavirus infection	0.00764861
MPP5	hsa-miR-302b-3p	high_expressed_in_wm_score_high	low_expressed_in_wm_score_high	Human papillomavirus infection	0.00764861
MPP5	hsa-miR-520e	high_expressed_in_wm_score_high	low_expressed_in_wm_score_high	Human papillomavirus infection	0.00764861
MSH3	hsa-miR-373-3p	high_expressed_in_wm_score_high	low_expressed_in_wm_score_high	Colorectal cancer	0.00812059
MSH3	hsa-miR-302d-3p	high_expressed_in_wm_score_high	low_expressed_in_wm_score_high	Colorectal cancer	0.00812059
MSH3	hsa-miR-302c-3p.1	high_expressed_in_wm_score_high	low_expressed_in_wm_score_high	Colorectal cancer	0.00812059
MSH3	hsa-miR-302b-3p	high_expressed_in_wm_score_high	low_expressed_in_wm_score_high	Colorectal cancer	0.00812059
MSH3	hsa-miR-302a-3p	high_expressed_in_wm_score_high	low_expressed_in_wm_score_high	Colorectal cancer	0.00812059
MSH3	hsa-miR-520e	high_expressed_in_wm_score_high	low_expressed_in_wm_score_high	Colorectal cancer	0.00812059
MSH3	hsa-miR-520d-3p	high_expressed_in_wm_score_high	low_expressed_in_wm_score_high	Colorectal cancer	0.00812059
MTMR3	hsa-miR-520e	high_expressed_in_wm_score_high	high_expressed_in_wm_score_high	Autophagy - animal	0.00122306
MTMR3	hsa-miR-373-3p	high_expressed_in_wm_score_high	high_expressed_in_wm_score_high	Autophagy - animal	0.00122306
MTMR3	hsa-miR-302a-3p	high_expressed_in_wm_score_high	high_expressed_in_wm_score_high	Autophagy - animal	0.00122306
MTMR3	hsa-miR-302b-3p	high_expressed_in_wm_score_high	high_expressed_in_wm_score_high	Autophagy - animal	0.00122306
MTMR3	hsa-miR-520d-3p	high_expressed_in_wm_score_high	high_expressed_in_wm_score_high	Autophagy - animal	0.00122306
MTMR3	hsa-miR-302d-3p	high_expressed_in_wm_score_high	high_expressed_in_wm_score_high	Autophagy - animal	0.00122306
MTMR3	hsa-miR-302c-3p.1	high_expressed_in_wm_score_high	high_expressed_in_wm_score_high	Autophagy - animal	0.00122306
MTMR4	hsa-miR-302c-3p.1	high_expressed_in_wm_score_high	low_expressed_in_wm_score_high	Autophagy - animal	0.00122306
MTMR4	hsa-miR-520d-3p	high_expressed_in_wm_score_high	low_expressed_in_wm_score_high	Autophagy - animal	0.00122306
MTMR4	hsa-miR-520e	high_expressed_in_wm_score_high	low_expressed_in_wm_score_high	Autophagy - animal	0.00122306
MTMR4	hsa-miR-373-3p	high_expressed_in_wm_score_high	low_expressed_in_wm_score_high	Autophagy - animal	0.00122306
MTMR4	hsa-miR-302d-3p	high_expressed_in_wm_score_high	low_expressed_in_wm_score_high	Autophagy - animal	0.00122306
MTMR4	hsa-miR-302b-3p	high_expressed_in_wm_score_high	low_expressed_in_wm_score_high	Autophagy - animal	0.00122306
MTMR4	hsa-miR-302a-3p	high_expressed_in_wm_score_high	low_expressed_in_wm_score_high	Autophagy - animal	0.00122306
MYCN	hsa-miR-371a-5p	high_expressed_in_wm_score_high	high_expressed_in_wm_score_high	Transcriptional misregulation in cancer	0.00812059
MYCN	hsa-miR-520d-3p	high_expressed_in_wm_score_high	high_expressed_in_wm_score_high	Transcriptional misregulation in cancer	0.00812059
MYCN	hsa-miR-302b-3p	high_expressed_in_wm_score_high	high_expressed_in_wm_score_high	Transcriptional misregulation in cancer	0.00812059
MYCN	hsa-miR-520e	high_expressed_in_wm_score_high	high_expressed_in_wm_score_high	Transcriptional misregulation in cancer	0.00812059
MYCN	hsa-miR-302d-3p	high_expressed_in_wm_score_high	high_expressed_in_wm_score_high	Transcriptional misregulation in cancer	0.00812059
MYCN	hsa-miR-302c-3p.1	high_expressed_in_wm_score_high	high_expressed_in_wm_score_high	Transcriptional misregulation in cancer	0.00812059
MYCN	hsa-miR-302a-3p	high_expressed_in_wm_score_high	high_expressed_in_wm_score_high	Transcriptional misregulation in cancer	0.00812059
MYCN	hsa-miR-373-3p	high_expressed_in_wm_score_high	high_expressed_in_wm_score_high	Transcriptional misregulation in cancer	0.00812059
MYLK	hsa-miR-373-3p	high_expressed_in_wm_score_high	low_expressed_in_wm_score_high	Focal adhesion	0.00764861
MYLK	hsa-miR-520e	high_expressed_in_wm_score_high	low_expressed_in_wm_score_high	Focal adhesion	0.00764861
MYLK	hsa-miR-520d-3p	high_expressed_in_wm_score_high	low_expressed_in_wm_score_high	Focal adhesion	0.00764861
MYLK	hsa-miR-302d-3p	high_expressed_in_wm_score_high	low_expressed_in_wm_score_high	Focal adhesion	0.00764861
MYLK	hsa-miR-302c-3p.1	high_expressed_in_wm_score_high	low_expressed_in_wm_score_high	Focal adhesion	0.00764861
MYLK	hsa-miR-302b-3p	high_expressed_in_wm_score_high	low_expressed_in_wm_score_high	Focal adhesion	0.00764861
MYLK	hsa-miR-302a-3p	high_expressed_in_wm_score_high	low_expressed_in_wm_score_high	Focal adhesion	0.00764861
NCOA3	hsa-miR-302a-3p	high_expressed_in_wm_score_high	high_expressed_in_wm_score_high	Breast cancer	0.00122306
NCOA3	hsa-miR-520d-3p	high_expressed_in_wm_score_high	high_expressed_in_wm_score_high	Breast cancer	0.00122306
NCOA3	hsa-miR-520e	high_expressed_in_wm_score_high	high_expressed_in_wm_score_high	Breast cancer	0.00122306
NCOA3	hsa-miR-373-3p	high_expressed_in_wm_score_high	high_expressed_in_wm_score_high	Breast cancer	0.00122306
NCOA3	hsa-miR-302b-3p	high_expressed_in_wm_score_high	high_expressed_in_wm_score_high	Breast cancer	0.00122306
NCOA3	hsa-miR-302c-3p.1	high_expressed_in_wm_score_high	high_expressed_in_wm_score_high	Breast cancer	0.00122306
NCOA3	hsa-miR-302d-3p	high_expressed_in_wm_score_high	high_expressed_in_wm_score_high	Breast cancer	0.00122306
NKX3-1	hsa-miR-302b-3p	high_expressed_in_wm_score_high	low_expressed_in_wm_score_high	Prostate cancer	0.00889546
NKX3-1	hsa-miR-302c-3p.1	high_expressed_in_wm_score_high	low_expressed_in_wm_score_high	Prostate cancer	0.00889546
NKX3-1	hsa-miR-302d-3p	high_expressed_in_wm_score_high	low_expressed_in_wm_score_high	Prostate cancer	0.00889546
NKX3-1	hsa-miR-373-3p	high_expressed_in_wm_score_high	low_expressed_in_wm_score_high	Prostate cancer	0.00889546
NKX3-1	hsa-miR-302a-3p	high_expressed_in_wm_score_high	low_expressed_in_wm_score_high	Prostate cancer	0.00889546
NKX3-1	hsa-miR-520d-3p	high_expressed_in_wm_score_high	low_expressed_in_wm_score_high	Prostate cancer	0.00889546
NKX3-1	hsa-miR-520e	high_expressed_in_wm_score_high	low_expressed_in_wm_score_high	Prostate cancer	0.00889546
NR4A3	hsa-miR-520d-3p	high_expressed_in_wm_score_high	low_expressed_in_wm_score_high	Transcriptional misregulation in cancer	0.00812059
NR4A3	hsa-miR-373-3p	high_expressed_in_wm_score_high	low_expressed_in_wm_score_high	Transcriptional misregulation in cancer	0.00812059
NR4A3	hsa-miR-302d-3p	high_expressed_in_wm_score_high	low_expressed_in_wm_score_high	Transcriptional misregulation in cancer	0.00812059
NR4A3	hsa-miR-302c-3p.1	high_expressed_in_wm_score_high	low_expressed_in_wm_score_high	Transcriptional misregulation in cancer	0.00812059
NR4A3	hsa-miR-302b-3p	high_expressed_in_wm_score_high	low_expressed_in_wm_score_high	Transcriptional misregulation in cancer	0.00812059
NR4A3	hsa-miR-302a-3p	high_expressed_in_wm_score_high	low_expressed_in_wm_score_high	Transcriptional misregulation in cancer	0.00812059
NR4A3	hsa-miR-520e	high_expressed_in_wm_score_high	low_expressed_in_wm_score_high	Transcriptional misregulation in cancer	0.00812059
NTN4	hsa-miR-520d-3p	high_expressed_in_wm_score_high	low_expressed_in_wm_score_high	Axon guidance	0.0170671
NTN4	hsa-miR-302a-3p	high_expressed_in_wm_score_high	low_expressed_in_wm_score_high	Axon guidance	0.0170671
NTN4	hsa-miR-520e	high_expressed_in_wm_score_high	low_expressed_in_wm_score_high	Axon guidance	0.0170671
NTN4	hsa-miR-302b-3p	high_expressed_in_wm_score_high	low_expressed_in_wm_score_high	Axon guidance	0.0170671
NTN4	hsa-miR-302c-3p.1	high_expressed_in_wm_score_high	low_expressed_in_wm_score_high	Axon guidance	0.0170671
NTN4	hsa-miR-373-3p	high_expressed_in_wm_score_high	low_expressed_in_wm_score_high	Axon guidance	0.0170671
NTN4	hsa-miR-302d-3p	high_expressed_in_wm_score_high	low_expressed_in_wm_score_high	Axon guidance	0.0170671
ONECUT1	hsa-miR-302d-3p	high_expressed_in_wm_score_high	high_expressed_in_wm_score_high	Signaling pathways regulating pluripotency of stem cells	0.00108506
ONECUT1	hsa-miR-302b-3p	high_expressed_in_wm_score_high	high_expressed_in_wm_score_high	Signaling pathways regulating pluripotency of stem cells	0.00108506
ONECUT1	hsa-miR-302a-3p	high_expressed_in_wm_score_high	high_expressed_in_wm_score_high	Signaling pathways regulating pluripotency of stem cells	0.00108506
ONECUT1	hsa-miR-302c-3p.1	high_expressed_in_wm_score_high	high_expressed_in_wm_score_high	Signaling pathways regulating pluripotency of stem cells	0.00108506
ONECUT1	hsa-miR-520d-3p	high_expressed_in_wm_score_high	high_expressed_in_wm_score_high	Signaling pathways regulating pluripotency of stem cells	0.00108506
ONECUT1	hsa-miR-373-3p	high_expressed_in_wm_score_high	high_expressed_in_wm_score_high	Signaling pathways regulating pluripotency of stem cells	0.00108506
ONECUT1	hsa-miR-520e	high_expressed_in_wm_score_high	high_expressed_in_wm_score_high	Signaling pathways regulating pluripotency of stem cells	0.00108506
ONECUT1	hsa-miR-302c-3p.1	high_expressed_in_wm_score_high	high_expressed_in_wm_score_high	Signaling pathways regulating pluripotency of stem cells	0.00108506
ONECUT1	hsa-miR-520e	high_expressed_in_wm_score_high	high_expressed_in_wm_score_high	Signaling pathways regulating pluripotency of stem cells	0.00108506
ONECUT1	hsa-miR-302d-3p	high_expressed_in_wm_score_high	high_expressed_in_wm_score_high	Signaling pathways regulating pluripotency of stem cells	0.00108506
ONECUT1	hsa-miR-302b-3p	high_expressed_in_wm_score_high	high_expressed_in_wm_score_high	Signaling pathways regulating pluripotency of stem cells	0.00108506
ONECUT1	hsa-miR-373-3p	high_expressed_in_wm_score_high	high_expressed_in_wm_score_high	Signaling pathways regulating pluripotency of stem cells	0.00108506
ONECUT1	hsa-miR-520d-3p	high_expressed_in_wm_score_high	high_expressed_in_wm_score_high	Signaling pathways regulating pluripotency of stem cells	0.00108506
ONECUT1	hsa-miR-302a-3p	high_expressed_in_wm_score_high	high_expressed_in_wm_score_high	Signaling pathways regulating pluripotency of stem cells	0.00108506
PAK2	hsa-miR-302d-3p	high_expressed_in_wm_score_high	high_expressed_in_wm_score_high	Axon guidance	0.0170671
PAK2	hsa-miR-302b-3p	high_expressed_in_wm_score_high	high_expressed_in_wm_score_high	Axon guidance	0.0170671
PAK2	hsa-miR-373-3p	high_expressed_in_wm_score_high	high_expressed_in_wm_score_high	Axon guidance	0.0170671
PAK2	hsa-miR-302c-3p.1	high_expressed_in_wm_score_high	high_expressed_in_wm_score_high	Axon guidance	0.0170671
PAK2	hsa-miR-520e	high_expressed_in_wm_score_high	high_expressed_in_wm_score_high	Axon guidance	0.0170671
PAK2	hsa-miR-520d-3p	high_expressed_in_wm_score_high	high_expressed_in_wm_score_high	Axon guidance	0.0170671
PAK2	hsa-miR-302a-3p	high_expressed_in_wm_score_high	high_expressed_in_wm_score_high	Axon guidance	0.0170671
PAK3	hsa-miR-302a-3p	high_expressed_in_wm_score_high	low_expressed_in_wm_score_high	Axon guidance	0.0170671
PAK3	hsa-miR-302b-3p	high_expressed_in_wm_score_high	low_expressed_in_wm_score_high	Axon guidance	0.0170671
PAK3	hsa-miR-302c-3p.1	high_expressed_in_wm_score_high	low_expressed_in_wm_score_high	Axon guidance	0.0170671
PAK3	hsa-miR-302d-3p	high_expressed_in_wm_score_high	low_expressed_in_wm_score_high	Axon guidance	0.0170671
PAK3	hsa-miR-520e	high_expressed_in_wm_score_high	low_expressed_in_wm_score_high	Axon guidance	0.0170671
PAK3	hsa-miR-520d-3p	high_expressed_in_wm_score_high	low_expressed_in_wm_score_high	Axon guidance	0.0170671
PAK3	hsa-miR-373-3p	high_expressed_in_wm_score_high	low_expressed_in_wm_score_high	Axon guidance	0.0170671
PAK3	hsa-miR-371a-5p	high_expressed_in_wm_score_high	low_expressed_in_wm_score_high	Axon guidance	0.0170671
PBX1	hsa-miR-371a-5p	high_expressed_in_wm_score_high	low_expressed_in_wm_score_high	Transcriptional misregulation in cancer	0.00812059
PBX3	hsa-miR-520e	high_expressed_in_wm_score_high	high_expressed_in_wm_score_high	Transcriptional misregulation in cancer	0.00812059
PBX3	hsa-miR-520d-3p	high_expressed_in_wm_score_high	high_expressed_in_wm_score_high	Transcriptional misregulation in cancer	0.00812059
PBX3	hsa-miR-302b-3p	high_expressed_in_wm_score_high	high_expressed_in_wm_score_high	Transcriptional misregulation in cancer	0.00812059
PBX3	hsa-miR-373-3p	high_expressed_in_wm_score_high	high_expressed_in_wm_score_high	Transcriptional misregulation in cancer	0.00812059
PBX3	hsa-miR-302d-3p	high_expressed_in_wm_score_high	high_expressed_in_wm_score_high	Transcriptional misregulation in cancer	0.00812059
PBX3	hsa-miR-302c-3p.1	high_expressed_in_wm_score_high	high_expressed_in_wm_score_high	Transcriptional misregulation in cancer	0.00812059
PBX3	hsa-miR-302a-3p	high_expressed_in_wm_score_high	high_expressed_in_wm_score_high	Transcriptional misregulation in cancer	0.00812059
PCGF5	hsa-miR-302a-3p	high_expressed_in_wm_score_high	low_expressed_in_wm_score_high	Signaling pathways regulating pluripotency of stem cells	0.00108506
PCGF5	hsa-miR-302b-3p	high_expressed_in_wm_score_high	low_expressed_in_wm_score_high	Signaling pathways regulating pluripotency of stem cells	0.00108506
PCGF5	hsa-miR-302c-3p.1	high_expressed_in_wm_score_high	low_expressed_in_wm_score_high	Signaling pathways regulating pluripotency of stem cells	0.00108506
PCGF5	hsa-miR-302d-3p	high_expressed_in_wm_score_high	low_expressed_in_wm_score_high	Signaling pathways regulating pluripotency of stem cells	0.00108506
PCGF5	hsa-miR-520e	high_expressed_in_wm_score_high	low_expressed_in_wm_score_high	Signaling pathways regulating pluripotency of stem cells	0.00108506
PCGF5	hsa-miR-373-3p	high_expressed_in_wm_score_high	low_expressed_in_wm_score_high	Signaling pathways regulating pluripotency of stem cells	0.00108506
PCGF5	hsa-miR-520d-3p	high_expressed_in_wm_score_high	low_expressed_in_wm_score_high	Signaling pathways regulating pluripotency of stem cells	0.00108506
PDCD4	hsa-miR-302d-3p	high_expressed_in_wm_score_high	high_expressed_in_wm_score_high	MicroRNAs in cancer	0.00421714
PDCD4	hsa-miR-520e	high_expressed_in_wm_score_high	high_expressed_in_wm_score_high	MicroRNAs in cancer	0.00421714
PDCD4	hsa-miR-520d-3p	high_expressed_in_wm_score_high	high_expressed_in_wm_score_high	MicroRNAs in cancer	0.00421714
PDCD4	hsa-miR-373-3p	high_expressed_in_wm_score_high	high_expressed_in_wm_score_high	MicroRNAs in cancer	0.00421714
PDCD4	hsa-miR-302c-3p.1	high_expressed_in_wm_score_high	high_expressed_in_wm_score_high	MicroRNAs in cancer	0.00421714
PDCD4	hsa-miR-302b-3p	high_expressed_in_wm_score_high	high_expressed_in_wm_score_high	MicroRNAs in cancer	0.00421714
PDCD4	hsa-miR-302a-3p	high_expressed_in_wm_score_high	high_expressed_in_wm_score_high	MicroRNAs in cancer	0.00421714
PFN2	hsa-miR-302d-3p	high_expressed_in_wm_score_high	high_expressed_in_wm_score_high	Regulation of actin cytoskeleton	0.00700649
PFN2	hsa-miR-302c-3p.1	high_expressed_in_wm_score_high	high_expressed_in_wm_score_high	Regulation of actin cytoskeleton	0.00700649
PFN2	hsa-miR-373-3p	high_expressed_in_wm_score_high	high_expressed_in_wm_score_high	Regulation of actin cytoskeleton	0.00700649
PFN2	hsa-miR-302b-3p	high_expressed_in_wm_score_high	high_expressed_in_wm_score_high	Regulation of actin cytoskeleton	0.00700649
PFN2	hsa-miR-302a-3p	high_expressed_in_wm_score_high	high_expressed_in_wm_score_high	Regulation of actin cytoskeleton	0.00700649
PFN2	hsa-miR-520d-3p	high_expressed_in_wm_score_high	high_expressed_in_wm_score_high	Regulation of actin cytoskeleton	0.00700649
PFN2	hsa-miR-520e	high_expressed_in_wm_score_high	high_expressed_in_wm_score_high	Regulation of actin cytoskeleton	0.00700649
PHLPP2	hsa-miR-371a-5p	high_expressed_in_wm_score_high	low_expressed_in_wm_score_high	PI3K-Akt signaling pathway	0.00759012
PHLPP2	hsa-miR-520e	high_expressed_in_wm_score_high	low_expressed_in_wm_score_high	PI3K-Akt signaling pathway	0.00759012
PHLPP2	hsa-miR-520d-3p	high_expressed_in_wm_score_high	low_expressed_in_wm_score_high	PI3K-Akt signaling pathway	0.00759012
PHLPP2	hsa-miR-302d-3p	high_expressed_in_wm_score_high	low_expressed_in_wm_score_high	PI3K-Akt signaling pathway	0.00759012
PHLPP2	hsa-miR-302b-3p	high_expressed_in_wm_score_high	low_expressed_in_wm_score_high	PI3K-Akt signaling pathway	0.00759012
PHLPP2	hsa-miR-302a-3p	high_expressed_in_wm_score_high	low_expressed_in_wm_score_high	PI3K-Akt signaling pathway	0.00759012
PHLPP2	hsa-miR-373-3p	high_expressed_in_wm_score_high	low_expressed_in_wm_score_high	PI3K-Akt signaling pathway	0.00759012
PHLPP2	hsa-miR-302c-3p.1	high_expressed_in_wm_score_high	low_expressed_in_wm_score_high	PI3K-Akt signaling pathway	0.00759012
PIK3R3	hsa-miR-520e	high_expressed_in_wm_score_high	low_expressed_in_wm_score_high	Human T-cell leukemia virus 1 infection	0.0175415
PIK3R3	hsa-miR-302c-3p.1	high_expressed_in_wm_score_high	low_expressed_in_wm_score_high	Human T-cell leukemia virus 1 infection	0.0175415
PIK3R3	hsa-miR-302a-3p	high_expressed_in_wm_score_high	low_expressed_in_wm_score_high	Human T-cell leukemia virus 1 infection	0.0175415
PIK3R3	hsa-miR-373-3p	high_expressed_in_wm_score_high	low_expressed_in_wm_score_high	Human T-cell leukemia virus 1 infection	0.0175415
PIK3R3	hsa-miR-520d-3p	high_expressed_in_wm_score_high	low_expressed_in_wm_score_high	Human T-cell leukemia virus 1 infection	0.0175415
PIK3R3	hsa-miR-302d-3p	high_expressed_in_wm_score_high	low_expressed_in_wm_score_high	Human T-cell leukemia virus 1 infection	0.0175415
PIK3R3	hsa-miR-302b-3p	high_expressed_in_wm_score_high	low_expressed_in_wm_score_high	Human T-cell leukemia virus 1 infection	0.0175415
PIP4K2A	hsa-miR-302d-3p	high_expressed_in_wm_score_high	high_expressed_in_wm_score_high	Regulation of actin cytoskeleton	0.00700649
PIP4K2A	hsa-miR-520d-3p	high_expressed_in_wm_score_high	high_expressed_in_wm_score_high	Regulation of actin cytoskeleton	0.00700649
PIP4K2A	hsa-miR-520e	high_expressed_in_wm_score_high	high_expressed_in_wm_score_high	Regulation of actin cytoskeleton	0.00700649
PIP4K2A	hsa-miR-302c-3p.1	high_expressed_in_wm_score_high	high_expressed_in_wm_score_high	Regulation of actin cytoskeleton	0.00700649
PIP4K2A	hsa-miR-302a-3p	high_expressed_in_wm_score_high	high_expressed_in_wm_score_high	Regulation of actin cytoskeleton	0.00700649
PIP4K2A	hsa-miR-302b-3p	high_expressed_in_wm_score_high	high_expressed_in_wm_score_high	Regulation of actin cytoskeleton	0.00700649
PIP4K2A	hsa-miR-373-3p	high_expressed_in_wm_score_high	high_expressed_in_wm_score_high	Regulation of actin cytoskeleton	0.00700649
PIP4K2B	hsa-miR-371a-5p	high_expressed_in_wm_score_high	high_expressed_in_wm_score_high	Regulation of actin cytoskeleton	0.00700649
PKMYT1	hsa-miR-371a-5p	high_expressed_in_wm_score_high	high_expressed_in_wm_score_high	Oocyte meiosis	0.00947978
PKN2	hsa-miR-302c-3p.1	high_expressed_in_wm_score_high	low_expressed_in_wm_score_high	PI3K-Akt signaling pathway	0.00759012
PKN2	hsa-miR-302b-3p	high_expressed_in_wm_score_high	low_expressed_in_wm_score_high	PI3K-Akt signaling pathway	0.00759012
PKN2	hsa-miR-373-3p	high_expressed_in_wm_score_high	low_expressed_in_wm_score_high	PI3K-Akt signaling pathway	0.00759012
PKN2	hsa-miR-302a-3p	high_expressed_in_wm_score_high	low_expressed_in_wm_score_high	PI3K-Akt signaling pathway	0.00759012
PKN2	hsa-miR-302d-3p	high_expressed_in_wm_score_high	low_expressed_in_wm_score_high	PI3K-Akt signaling pathway	0.00759012
PKN2	hsa-miR-520d-3p	high_expressed_in_wm_score_high	low_expressed_in_wm_score_high	PI3K-Akt signaling pathway	0.00759012
PKN2	hsa-miR-520e	high_expressed_in_wm_score_high	low_expressed_in_wm_score_high	PI3K-Akt signaling pathway	0.00759012
PLXNA1	hsa-miR-520e	high_expressed_in_wm_score_high	high_expressed_in_wm_score_high	Axon guidance	0.0170671
PLXNA1	hsa-miR-373-3p	high_expressed_in_wm_score_high	high_expressed_in_wm_score_high	Axon guidance	0.0170671
PLXNA1	hsa-miR-302d-3p	high_expressed_in_wm_score_high	high_expressed_in_wm_score_high	Axon guidance	0.0170671
PLXNA1	hsa-miR-302c-3p.1	high_expressed_in_wm_score_high	high_expressed_in_wm_score_high	Axon guidance	0.0170671
PLXNA1	hsa-miR-520d-3p	high_expressed_in_wm_score_high	high_expressed_in_wm_score_high	Axon guidance	0.0170671
PLXNA1	hsa-miR-302a-3p	high_expressed_in_wm_score_high	high_expressed_in_wm_score_high	Axon guidance	0.0170671
PLXNA1	hsa-miR-302b-3p	high_expressed_in_wm_score_high	high_expressed_in_wm_score_high	Axon guidance	0.0170671
PLXNC1	hsa-miR-520d-3p	high_expressed_in_wm_score_high	high_expressed_in_wm_score_high	Axon guidance	0.0170671
PLXNC1	hsa-miR-520e	high_expressed_in_wm_score_high	high_expressed_in_wm_score_high	Axon guidance	0.0170671
PLXNC1	hsa-miR-373-3p	high_expressed_in_wm_score_high	high_expressed_in_wm_score_high	Axon guidance	0.0170671
PLXNC1	hsa-miR-302d-3p	high_expressed_in_wm_score_high	high_expressed_in_wm_score_high	Axon guidance	0.0170671
PLXNC1	hsa-miR-302b-3p	high_expressed_in_wm_score_high	high_expressed_in_wm_score_high	Axon guidance	0.0170671
PLXNC1	hsa-miR-302c-3p.1	high_expressed_in_wm_score_high	high_expressed_in_wm_score_high	Axon guidance	0.0170671
PLXNC1	hsa-miR-302a-3p	high_expressed_in_wm_score_high	high_expressed_in_wm_score_high	Axon guidance	0.0170671
POLK	hsa-miR-302b-3p	high_expressed_in_wm_score_high	low_expressed_in_wm_score_high	Basal cell carcinoma	0.0392676
POLK	hsa-miR-302a-3p	high_expressed_in_wm_score_high	low_expressed_in_wm_score_high	Basal cell carcinoma	0.0392676
POLK	hsa-miR-520e	high_expressed_in_wm_score_high	low_expressed_in_wm_score_high	Basal cell carcinoma	0.0392676
POLK	hsa-miR-520d-3p	high_expressed_in_wm_score_high	low_expressed_in_wm_score_high	Basal cell carcinoma	0.0392676
POLK	hsa-miR-302d-3p	high_expressed_in_wm_score_high	low_expressed_in_wm_score_high	Basal cell carcinoma	0.0392676
POLK	hsa-miR-302c-3p.1	high_expressed_in_wm_score_high	low_expressed_in_wm_score_high	Basal cell carcinoma	0.0392676
POLK	hsa-miR-373-3p	high_expressed_in_wm_score_high	low_expressed_in_wm_score_high	Basal cell carcinoma	0.0392676
POLK	hsa-miR-302d-3p	high_expressed_in_wm_score_high	low_expressed_in_wm_score_high	Basal cell carcinoma	0.0392676
POLK	hsa-miR-302c-3p.1	high_expressed_in_wm_score_high	low_expressed_in_wm_score_high	Basal cell carcinoma	0.0392676
POLK	hsa-miR-520e	high_expressed_in_wm_score_high	low_expressed_in_wm_score_high	Basal cell carcinoma	0.0392676
POLK	hsa-miR-373-3p	high_expressed_in_wm_score_high	low_expressed_in_wm_score_high	Basal cell carcinoma	0.0392676
POLK	hsa-miR-520d-3p	high_expressed_in_wm_score_high	low_expressed_in_wm_score_high	Basal cell carcinoma	0.0392676
POLK	hsa-miR-302b-3p	high_expressed_in_wm_score_high	low_expressed_in_wm_score_high	Basal cell carcinoma	0.0392676
POLK	hsa-miR-302a-3p	high_expressed_in_wm_score_high	low_expressed_in_wm_score_high	Basal cell carcinoma	0.0392676
PPP3R1	hsa-miR-302b-3p	high_expressed_in_wm_score_high	low_expressed_in_wm_score_high	Human T-cell leukemia virus 1 infection	0.0175415
PPP3R1	hsa-miR-302d-3p	high_expressed_in_wm_score_high	low_expressed_in_wm_score_high	Human T-cell leukemia virus 1 infection	0.0175415
PPP3R1	hsa-miR-373-3p	high_expressed_in_wm_score_high	low_expressed_in_wm_score_high	Human T-cell leukemia virus 1 infection	0.0175415
PPP3R1	hsa-miR-302c-3p.1	high_expressed_in_wm_score_high	low_expressed_in_wm_score_high	Human T-cell leukemia virus 1 infection	0.0175415
PPP3R1	hsa-miR-302a-3p	high_expressed_in_wm_score_high	low_expressed_in_wm_score_high	Human T-cell leukemia virus 1 infection	0.0175415
PPP3R1	hsa-miR-520e	high_expressed_in_wm_score_high	low_expressed_in_wm_score_high	Human T-cell leukemia virus 1 infection	0.0175415
PPP3R1	hsa-miR-520d-3p	high_expressed_in_wm_score_high	low_expressed_in_wm_score_high	Human T-cell leukemia virus 1 infection	0.0175415
PRDM4	hsa-miR-302a-3p	high_expressed_in_wm_score_high	high_expressed_in_wm_score_high	Neurotrophin signaling pathway	0.0096311
PRDM4	hsa-miR-302b-3p	high_expressed_in_wm_score_high	high_expressed_in_wm_score_high	Neurotrophin signaling pathway	0.0096311
PRDM4	hsa-miR-520e	high_expressed_in_wm_score_high	high_expressed_in_wm_score_high	Neurotrophin signaling pathway	0.0096311
PRDM4	hsa-miR-520d-3p	high_expressed_in_wm_score_high	high_expressed_in_wm_score_high	Neurotrophin signaling pathway	0.0096311
PRDM4	hsa-miR-302d-3p	high_expressed_in_wm_score_high	high_expressed_in_wm_score_high	Neurotrophin signaling pathway	0.0096311
PRDM4	hsa-miR-302c-3p.1	high_expressed_in_wm_score_high	high_expressed_in_wm_score_high	Neurotrophin signaling pathway	0.0096311
PRDM4	hsa-miR-373-3p	high_expressed_in_wm_score_high	high_expressed_in_wm_score_high	Neurotrophin signaling pathway	0.0096311
PRKACB	hsa-miR-520e	high_expressed_in_wm_score_high	low_expressed_in_wm_score_high	Human T-cell leukemia virus 1 infection	0.0175415
PRKACB	hsa-miR-520d-3p	high_expressed_in_wm_score_high	low_expressed_in_wm_score_high	Human T-cell leukemia virus 1 infection	0.0175415
PRKACB	hsa-miR-302d-3p	high_expressed_in_wm_score_high	low_expressed_in_wm_score_high	Human T-cell leukemia virus 1 infection	0.0175415
PRKACB	hsa-miR-302b-3p	high_expressed_in_wm_score_high	low_expressed_in_wm_score_high	Human T-cell leukemia virus 1 infection	0.0175415
PRKACB	hsa-miR-302c-3p.1	high_expressed_in_wm_score_high	low_expressed_in_wm_score_high	Human T-cell leukemia virus 1 infection	0.0175415
PRKACB	hsa-miR-373-3p	high_expressed_in_wm_score_high	low_expressed_in_wm_score_high	Human T-cell leukemia virus 1 infection	0.0175415
PRKACB	hsa-miR-302a-3p	high_expressed_in_wm_score_high	low_expressed_in_wm_score_high	Human T-cell leukemia virus 1 infection	0.0175415
PSEN1	hsa-miR-302c-3p.1	high_expressed_in_wm_score_high	low_expressed_in_wm_score_high	Neurotrophin signaling pathway	0.0096311
PSEN1	hsa-miR-373-3p	high_expressed_in_wm_score_high	low_expressed_in_wm_score_high	Neurotrophin signaling pathway	0.0096311
PSEN1	hsa-miR-302d-3p	high_expressed_in_wm_score_high	low_expressed_in_wm_score_high	Neurotrophin signaling pathway	0.0096311
PSEN1	hsa-miR-302b-3p	high_expressed_in_wm_score_high	low_expressed_in_wm_score_high	Neurotrophin signaling pathway	0.0096311
PSEN1	hsa-miR-302a-3p	high_expressed_in_wm_score_high	low_expressed_in_wm_score_high	Neurotrophin signaling pathway	0.0096311
PSEN1	hsa-miR-520d-3p	high_expressed_in_wm_score_high	low_expressed_in_wm_score_high	Neurotrophin signaling pathway	0.0096311
PSEN1	hsa-miR-520e	high_expressed_in_wm_score_high	low_expressed_in_wm_score_high	Neurotrophin signaling pathway	0.0096311
PTEN	hsa-miR-371a-5p	high_expressed_in_wm_score_high	low_expressed_in_wm_score_high	Human T-cell leukemia virus 1 infection	0.0175415
RAB33B	hsa-miR-371a-5p	high_expressed_in_wm_score_high	low_expressed_in_wm_score_high	Autophagy - animal	0.00122306
RAB8A	hsa-miR-373-3p	high_expressed_in_wm_score_high	low_expressed_in_wm_score_high	Autophagy - animal	0.00122306
RAB8A	hsa-miR-520d-3p	high_expressed_in_wm_score_high	low_expressed_in_wm_score_high	Autophagy - animal	0.00122306
RAB8A	hsa-miR-520e	high_expressed_in_wm_score_high	low_expressed_in_wm_score_high	Autophagy - animal	0.00122306
RAB8A	hsa-miR-302a-3p	high_expressed_in_wm_score_high	low_expressed_in_wm_score_high	Autophagy - animal	0.00122306
RAB8A	hsa-miR-302c-3p.1	high_expressed_in_wm_score_high	low_expressed_in_wm_score_high	Autophagy - animal	0.00122306
RAB8A	hsa-miR-302b-3p	high_expressed_in_wm_score_high	low_expressed_in_wm_score_high	Autophagy - animal	0.00122306
RAB8A	hsa-miR-302d-3p	high_expressed_in_wm_score_high	low_expressed_in_wm_score_high	Autophagy - animal	0.00122306
RAD23B	hsa-miR-302a-3p	high_expressed_in_wm_score_high	low_expressed_in_wm_score_high	Protein processing in endoplasmic reticulum	0.0170927
RAD23B	hsa-miR-302b-3p	high_expressed_in_wm_score_high	low_expressed_in_wm_score_high	Protein processing in endoplasmic reticulum	0.0170927
RAD23B	hsa-miR-302d-3p	high_expressed_in_wm_score_high	low_expressed_in_wm_score_high	Protein processing in endoplasmic reticulum	0.0170927
RAD23B	hsa-miR-302c-3p.1	high_expressed_in_wm_score_high	low_expressed_in_wm_score_high	Protein processing in endoplasmic reticulum	0.0170927
RAD23B	hsa-miR-373-3p	high_expressed_in_wm_score_high	low_expressed_in_wm_score_high	Protein processing in endoplasmic reticulum	0.0170927
RAD23B	hsa-miR-520d-3p	high_expressed_in_wm_score_high	low_expressed_in_wm_score_high	Protein processing in endoplasmic reticulum	0.0170927
RAD23B	hsa-miR-520e	high_expressed_in_wm_score_high	low_expressed_in_wm_score_high	Protein processing in endoplasmic reticulum	0.0170927
RALGDS	hsa-miR-302a-3p	high_expressed_in_wm_score_high	low_expressed_in_wm_score_high	Colorectal cancer	0.00812059
RALGDS	hsa-miR-520d-3p	high_expressed_in_wm_score_high	low_expressed_in_wm_score_high	Colorectal cancer	0.00812059
RALGDS	hsa-miR-520e	high_expressed_in_wm_score_high	low_expressed_in_wm_score_high	Colorectal cancer	0.00812059
RALGDS	hsa-miR-302c-3p.1	high_expressed_in_wm_score_high	low_expressed_in_wm_score_high	Colorectal cancer	0.00812059
RALGDS	hsa-miR-302b-3p	high_expressed_in_wm_score_high	low_expressed_in_wm_score_high	Colorectal cancer	0.00812059
RALGDS	hsa-miR-373-3p	high_expressed_in_wm_score_high	low_expressed_in_wm_score_high	Colorectal cancer	0.00812059
RALGDS	hsa-miR-302d-3p	high_expressed_in_wm_score_high	low_expressed_in_wm_score_high	Colorectal cancer	0.00812059
RAPGEF2	hsa-miR-302d-3p	high_expressed_in_wm_score_high	low_expressed_in_wm_score_high	MAPK signaling pathway	0.00349373
RAPGEF2	hsa-miR-302c-3p.1	high_expressed_in_wm_score_high	low_expressed_in_wm_score_high	MAPK signaling pathway	0.00349373
RAPGEF2	hsa-miR-302b-3p	high_expressed_in_wm_score_high	low_expressed_in_wm_score_high	MAPK signaling pathway	0.00349373
RAPGEF2	hsa-miR-520e	high_expressed_in_wm_score_high	low_expressed_in_wm_score_high	MAPK signaling pathway	0.00349373
RAPGEF2	hsa-miR-520d-3p	high_expressed_in_wm_score_high	low_expressed_in_wm_score_high	MAPK signaling pathway	0.00349373
RAPGEF2	hsa-miR-302a-3p	high_expressed_in_wm_score_high	low_expressed_in_wm_score_high	MAPK signaling pathway	0.00349373
RAPGEF2	hsa-miR-373-3p	high_expressed_in_wm_score_high	low_expressed_in_wm_score_high	MAPK signaling pathway	0.00349373
RB1CC1	hsa-miR-302c-3p.1	high_expressed_in_wm_score_high	low_expressed_in_wm_score_high	Autophagy - animal	0.00122306
RB1CC1	hsa-miR-302b-3p	high_expressed_in_wm_score_high	low_expressed_in_wm_score_high	Autophagy - animal	0.00122306
RB1CC1	hsa-miR-520e	high_expressed_in_wm_score_high	low_expressed_in_wm_score_high	Autophagy - animal	0.00122306
RB1CC1	hsa-miR-520d-3p	high_expressed_in_wm_score_high	low_expressed_in_wm_score_high	Autophagy - animal	0.00122306
RB1CC1	hsa-miR-302d-3p	high_expressed_in_wm_score_high	low_expressed_in_wm_score_high	Autophagy - animal	0.00122306
RB1CC1	hsa-miR-302a-3p	high_expressed_in_wm_score_high	low_expressed_in_wm_score_high	Autophagy - animal	0.00122306
RB1CC1	hsa-miR-373-3p	high_expressed_in_wm_score_high	low_expressed_in_wm_score_high	Autophagy - animal	0.00122306
RBL1	hsa-miR-302a-3p	high_expressed_in_wm_score_high	high_expressed_in_wm_score_high	Human papillomavirus infection	0.00764861
RBL1	hsa-miR-302b-3p	high_expressed_in_wm_score_high	high_expressed_in_wm_score_high	Human papillomavirus infection	0.00764861
RBL1	hsa-miR-302c-3p.1	high_expressed_in_wm_score_high	high_expressed_in_wm_score_high	Human papillomavirus infection	0.00764861
RBL1	hsa-miR-520e	high_expressed_in_wm_score_high	high_expressed_in_wm_score_high	Human papillomavirus infection	0.00764861
RBL1	hsa-miR-302d-3p	high_expressed_in_wm_score_high	high_expressed_in_wm_score_high	Human papillomavirus infection	0.00764861
RBL1	hsa-miR-520d-3p	high_expressed_in_wm_score_high	high_expressed_in_wm_score_high	Human papillomavirus infection	0.00764861
RBL1	hsa-miR-373-3p	high_expressed_in_wm_score_high	high_expressed_in_wm_score_high	Human papillomavirus infection	0.00764861
RDX	hsa-miR-302b-3p	high_expressed_in_wm_score_high	low_expressed_in_wm_score_high	Regulation of actin cytoskeleton	0.00700649
RDX	hsa-miR-520e	high_expressed_in_wm_score_high	low_expressed_in_wm_score_high	Regulation of actin cytoskeleton	0.00700649
RDX	hsa-miR-302c-3p.1	high_expressed_in_wm_score_high	low_expressed_in_wm_score_high	Regulation of actin cytoskeleton	0.00700649
RDX	hsa-miR-302d-3p	high_expressed_in_wm_score_high	low_expressed_in_wm_score_high	Regulation of actin cytoskeleton	0.00700649
RDX	hsa-miR-373-3p	high_expressed_in_wm_score_high	low_expressed_in_wm_score_high	Regulation of actin cytoskeleton	0.00700649
RDX	hsa-miR-302a-3p	high_expressed_in_wm_score_high	low_expressed_in_wm_score_high	Regulation of actin cytoskeleton	0.00700649
RDX	hsa-miR-520d-3p	high_expressed_in_wm_score_high	low_expressed_in_wm_score_high	Regulation of actin cytoskeleton	0.00700649
RECK	hsa-miR-520d-3p	high_expressed_in_wm_score_high	low_expressed_in_wm_score_high	MicroRNAs in cancer	0.00421714
RECK	hsa-miR-520e	high_expressed_in_wm_score_high	low_expressed_in_wm_score_high	MicroRNAs in cancer	0.00421714
RECK	hsa-miR-302b-3p	high_expressed_in_wm_score_high	low_expressed_in_wm_score_high	MicroRNAs in cancer	0.00421714
RECK	hsa-miR-302a-3p	high_expressed_in_wm_score_high	low_expressed_in_wm_score_high	MicroRNAs in cancer	0.00421714
RECK	hsa-miR-302c-3p.1	high_expressed_in_wm_score_high	low_expressed_in_wm_score_high	MicroRNAs in cancer	0.00421714
RECK	hsa-miR-302d-3p	high_expressed_in_wm_score_high	low_expressed_in_wm_score_high	MicroRNAs in cancer	0.00421714
RECK	hsa-miR-373-3p	high_expressed_in_wm_score_high	low_expressed_in_wm_score_high	MicroRNAs in cancer	0.00421714
RELA	hsa-miR-520d-3p	high_expressed_in_wm_score_high	low_expressed_in_wm_score_high	Human T-cell leukemia virus 1 infection	0.0175415
RELA	hsa-miR-302d-3p	high_expressed_in_wm_score_high	low_expressed_in_wm_score_high	Human T-cell leukemia virus 1 infection	0.0175415
RELA	hsa-miR-302b-3p	high_expressed_in_wm_score_high	low_expressed_in_wm_score_high	Human T-cell leukemia virus 1 infection	0.0175415
RELA	hsa-miR-373-3p	high_expressed_in_wm_score_high	low_expressed_in_wm_score_high	Human T-cell leukemia virus 1 infection	0.0175415
RELA	hsa-miR-302a-3p	high_expressed_in_wm_score_high	low_expressed_in_wm_score_high	Human T-cell leukemia virus 1 infection	0.0175415
RELA	hsa-miR-520e	high_expressed_in_wm_score_high	low_expressed_in_wm_score_high	Human T-cell leukemia virus 1 infection	0.0175415
RELA	hsa-miR-302c-3p.1	high_expressed_in_wm_score_high	low_expressed_in_wm_score_high	Human T-cell leukemia virus 1 infection	0.0175415
REST	hsa-miR-520e	high_expressed_in_wm_score_high	high_expressed_in_wm_score_high	Signaling pathways regulating pluripotency of stem cells	0.00108506
REST	hsa-miR-520d-3p	high_expressed_in_wm_score_high	high_expressed_in_wm_score_high	Signaling pathways regulating pluripotency of stem cells	0.00108506
REST	hsa-miR-373-3p	high_expressed_in_wm_score_high	high_expressed_in_wm_score_high	Signaling pathways regulating pluripotency of stem cells	0.00108506
REST	hsa-miR-302d-3p	high_expressed_in_wm_score_high	high_expressed_in_wm_score_high	Signaling pathways regulating pluripotency of stem cells	0.00108506
REST	hsa-miR-302c-3p.1	high_expressed_in_wm_score_high	high_expressed_in_wm_score_high	Signaling pathways regulating pluripotency of stem cells	0.00108506
REST	hsa-miR-302a-3p	high_expressed_in_wm_score_high	high_expressed_in_wm_score_high	Signaling pathways regulating pluripotency of stem cells	0.00108506
REST	hsa-miR-302b-3p	high_expressed_in_wm_score_high	high_expressed_in_wm_score_high	Signaling pathways regulating pluripotency of stem cells	0.00108506
RGMA	hsa-miR-373-3p	high_expressed_in_wm_score_high	low_expressed_in_wm_score_high	Axon guidance	0.0170671
RGMA	hsa-miR-302d-3p	high_expressed_in_wm_score_high	low_expressed_in_wm_score_high	Axon guidance	0.0170671
RGMA	hsa-miR-302c-3p.1	high_expressed_in_wm_score_high	low_expressed_in_wm_score_high	Axon guidance	0.0170671
RGMA	hsa-miR-302b-3p	high_expressed_in_wm_score_high	low_expressed_in_wm_score_high	Axon guidance	0.0170671
RGMA	hsa-miR-302a-3p	high_expressed_in_wm_score_high	low_expressed_in_wm_score_high	Axon guidance	0.0170671
RGMA	hsa-miR-520d-3p	high_expressed_in_wm_score_high	low_expressed_in_wm_score_high	Axon guidance	0.0170671
RGMA	hsa-miR-520e	high_expressed_in_wm_score_high	low_expressed_in_wm_score_high	Axon guidance	0.0170671
RGMB	hsa-miR-302a-3p	high_expressed_in_wm_score_high	low_expressed_in_wm_score_high	TGF-beta signaling pathway	0.000979125
RGMB	hsa-miR-520d-3p	high_expressed_in_wm_score_high	low_expressed_in_wm_score_high	TGF-beta signaling pathway	0.000979125
RGMB	hsa-miR-302c-3p.1	high_expressed_in_wm_score_high	low_expressed_in_wm_score_high	TGF-beta signaling pathway	0.000979125
RGMB	hsa-miR-373-3p	high_expressed_in_wm_score_high	low_expressed_in_wm_score_high	TGF-beta signaling pathway	0.000979125
RGMB	hsa-miR-302d-3p	high_expressed_in_wm_score_high	low_expressed_in_wm_score_high	TGF-beta signaling pathway	0.000979125
RGMB	hsa-miR-302b-3p	high_expressed_in_wm_score_high	low_expressed_in_wm_score_high	TGF-beta signaling pathway	0.000979125
RGMB	hsa-miR-520e	high_expressed_in_wm_score_high	low_expressed_in_wm_score_high	TGF-beta signaling pathway	0.000979125
ROCK1	hsa-miR-371a-5p	high_expressed_in_wm_score_high	high_expressed_in_wm_score_high	Axon guidance	0.0170671
ROCK2	hsa-miR-520d-3p	high_expressed_in_wm_score_high	high_expressed_in_wm_score_high	Axon guidance	0.0170671
ROCK2	hsa-miR-520e	high_expressed_in_wm_score_high	high_expressed_in_wm_score_high	Axon guidance	0.0170671
ROCK2	hsa-miR-373-3p	high_expressed_in_wm_score_high	high_expressed_in_wm_score_high	Axon guidance	0.0170671
ROCK2	hsa-miR-302c-3p.1	high_expressed_in_wm_score_high	high_expressed_in_wm_score_high	Axon guidance	0.0170671
ROCK2	hsa-miR-302d-3p	high_expressed_in_wm_score_high	high_expressed_in_wm_score_high	Axon guidance	0.0170671
ROCK2	hsa-miR-302b-3p	high_expressed_in_wm_score_high	high_expressed_in_wm_score_high	Axon guidance	0.0170671
ROCK2	hsa-miR-302a-3p	high_expressed_in_wm_score_high	high_expressed_in_wm_score_high	Axon guidance	0.0170671
RPS6KA1	hsa-miR-520e	high_expressed_in_wm_score_high	high_expressed_in_wm_score_high	Neurotrophin signaling pathway	0.0096311
RPS6KA1	hsa-miR-520d-3p	high_expressed_in_wm_score_high	high_expressed_in_wm_score_high	Neurotrophin signaling pathway	0.0096311
RPS6KA1	hsa-miR-373-3p	high_expressed_in_wm_score_high	high_expressed_in_wm_score_high	Neurotrophin signaling pathway	0.0096311
RPS6KA1	hsa-miR-302d-3p	high_expressed_in_wm_score_high	high_expressed_in_wm_score_high	Neurotrophin signaling pathway	0.0096311
RPS6KA1	hsa-miR-302b-3p	high_expressed_in_wm_score_high	high_expressed_in_wm_score_high	Neurotrophin signaling pathway	0.0096311
RPS6KA1	hsa-miR-302a-3p	high_expressed_in_wm_score_high	high_expressed_in_wm_score_high	Neurotrophin signaling pathway	0.0096311
RPS6KA1	hsa-miR-302c-3p.1	high_expressed_in_wm_score_high	high_expressed_in_wm_score_high	Neurotrophin signaling pathway	0.0096311
RPS6KA2	hsa-miR-302a-3p	high_expressed_in_wm_score_high	low_expressed_in_wm_score_high	Neurotrophin signaling pathway	0.0096311
RPS6KA2	hsa-miR-302b-3p	high_expressed_in_wm_score_high	low_expressed_in_wm_score_high	Neurotrophin signaling pathway	0.0096311
RPS6KA2	hsa-miR-302d-3p	high_expressed_in_wm_score_high	low_expressed_in_wm_score_high	Neurotrophin signaling pathway	0.0096311
RPS6KA2	hsa-miR-302c-3p.1	high_expressed_in_wm_score_high	low_expressed_in_wm_score_high	Neurotrophin signaling pathway	0.0096311
RPS6KA2	hsa-miR-520e	high_expressed_in_wm_score_high	low_expressed_in_wm_score_high	Neurotrophin signaling pathway	0.0096311
RPS6KA2	hsa-miR-373-3p	high_expressed_in_wm_score_high	low_expressed_in_wm_score_high	Neurotrophin signaling pathway	0.0096311
RPS6KA2	hsa-miR-520d-3p	high_expressed_in_wm_score_high	low_expressed_in_wm_score_high	Neurotrophin signaling pathway	0.0096311
RPS6KA2	hsa-miR-371a-5p	high_expressed_in_wm_score_high	low_expressed_in_wm_score_high	Neurotrophin signaling pathway	0.0096311
RPS6KA3	hsa-miR-520d-3p	high_expressed_in_wm_score_high	high_expressed_in_wm_score_high	Neurotrophin signaling pathway	0.0096311
RPS6KA3	hsa-miR-520e	high_expressed_in_wm_score_high	high_expressed_in_wm_score_high	Neurotrophin signaling pathway	0.0096311
RPS6KA3	hsa-miR-373-3p	high_expressed_in_wm_score_high	high_expressed_in_wm_score_high	Neurotrophin signaling pathway	0.0096311
RPS6KA3	hsa-miR-302a-3p	high_expressed_in_wm_score_high	high_expressed_in_wm_score_high	Neurotrophin signaling pathway	0.0096311
RPS6KA3	hsa-miR-302b-3p	high_expressed_in_wm_score_high	high_expressed_in_wm_score_high	Neurotrophin signaling pathway	0.0096311
RPS6KA3	hsa-miR-302d-3p	high_expressed_in_wm_score_high	high_expressed_in_wm_score_high	Neurotrophin signaling pathway	0.0096311
RPS6KA3	hsa-miR-302c-3p.1	high_expressed_in_wm_score_high	high_expressed_in_wm_score_high	Neurotrophin signaling pathway	0.0096311
RPS6KA5	hsa-miR-302a-3p	high_expressed_in_wm_score_high	low_expressed_in_wm_score_high	Bladder cancer	0.0259407
RPS6KA5	hsa-miR-373-3p	high_expressed_in_wm_score_high	low_expressed_in_wm_score_high	Bladder cancer	0.0259407
RPS6KA5	hsa-miR-302d-3p	high_expressed_in_wm_score_high	low_expressed_in_wm_score_high	Bladder cancer	0.0259407
RPS6KA5	hsa-miR-302c-3p.1	high_expressed_in_wm_score_high	low_expressed_in_wm_score_high	Bladder cancer	0.0259407
RPS6KA5	hsa-miR-302b-3p	high_expressed_in_wm_score_high	low_expressed_in_wm_score_high	Bladder cancer	0.0259407
RPS6KA5	hsa-miR-520e	high_expressed_in_wm_score_high	low_expressed_in_wm_score_high	Bladder cancer	0.0259407
RPS6KA5	hsa-miR-520d-3p	high_expressed_in_wm_score_high	low_expressed_in_wm_score_high	Bladder cancer	0.0259407
RPS6KA6	hsa-miR-302d-3p	high_expressed_in_wm_score_high	high_expressed_in_wm_score_high	Neurotrophin signaling pathway	0.0096311
RPS6KA6	hsa-miR-302c-3p.1	high_expressed_in_wm_score_high	high_expressed_in_wm_score_high	Neurotrophin signaling pathway	0.0096311
RPS6KA6	hsa-miR-302b-3p	high_expressed_in_wm_score_high	high_expressed_in_wm_score_high	Neurotrophin signaling pathway	0.0096311
RPS6KA6	hsa-miR-302a-3p	high_expressed_in_wm_score_high	high_expressed_in_wm_score_high	Neurotrophin signaling pathway	0.0096311
RPS6KA6	hsa-miR-520e	high_expressed_in_wm_score_high	high_expressed_in_wm_score_high	Neurotrophin signaling pathway	0.0096311
RPS6KA6	hsa-miR-373-3p	high_expressed_in_wm_score_high	high_expressed_in_wm_score_high	Neurotrophin signaling pathway	0.0096311
RPS6KA6	hsa-miR-520d-3p	high_expressed_in_wm_score_high	high_expressed_in_wm_score_high	Neurotrophin signaling pathway	0.0096311
RRAGD	hsa-miR-302d-3p	high_expressed_in_wm_score_high	high_expressed_in_wm_score_high	Autophagy - animal	0.00122306
RRAGD	hsa-miR-302c-3p.1	high_expressed_in_wm_score_high	high_expressed_in_wm_score_high	Autophagy - animal	0.00122306
RRAGD	hsa-miR-302a-3p	high_expressed_in_wm_score_high	high_expressed_in_wm_score_high	Autophagy - animal	0.00122306
RRAGD	hsa-miR-520e	high_expressed_in_wm_score_high	high_expressed_in_wm_score_high	Autophagy - animal	0.00122306
RRAGD	hsa-miR-520d-3p	high_expressed_in_wm_score_high	high_expressed_in_wm_score_high	Autophagy - animal	0.00122306
RRAGD	hsa-miR-302b-3p	high_expressed_in_wm_score_high	high_expressed_in_wm_score_high	Autophagy - animal	0.00122306
RRAGD	hsa-miR-373-3p	high_expressed_in_wm_score_high	high_expressed_in_wm_score_high	Autophagy - animal	0.00122306
RRAGD	hsa-miR-371a-5p	high_expressed_in_wm_score_high	high_expressed_in_wm_score_high	Autophagy - animal	0.00122306
RUNX1	hsa-miR-302d-3p	high_expressed_in_wm_score_high	high_expressed_in_wm_score_high	Transcriptional misregulation in cancer	0.00812059
RUNX1	hsa-miR-520e	high_expressed_in_wm_score_high	high_expressed_in_wm_score_high	Transcriptional misregulation in cancer	0.00812059
RUNX1	hsa-miR-520d-3p	high_expressed_in_wm_score_high	high_expressed_in_wm_score_high	Transcriptional misregulation in cancer	0.00812059
RUNX1	hsa-miR-373-3p	high_expressed_in_wm_score_high	high_expressed_in_wm_score_high	Transcriptional misregulation in cancer	0.00812059
RUNX1	hsa-miR-302b-3p	high_expressed_in_wm_score_high	high_expressed_in_wm_score_high	Transcriptional misregulation in cancer	0.00812059
RUNX1	hsa-miR-302c-3p.1	high_expressed_in_wm_score_high	high_expressed_in_wm_score_high	Transcriptional misregulation in cancer	0.00812059
RUNX1	hsa-miR-302a-3p	high_expressed_in_wm_score_high	high_expressed_in_wm_score_high	Transcriptional misregulation in cancer	0.00812059
RUNX2	hsa-miR-520d-3p	high_expressed_in_wm_score_high	high_expressed_in_wm_score_high	Transcriptional misregulation in cancer	0.00812059
RUNX2	hsa-miR-373-3p	high_expressed_in_wm_score_high	high_expressed_in_wm_score_high	Transcriptional misregulation in cancer	0.00812059
RUNX2	hsa-miR-302c-3p.1	high_expressed_in_wm_score_high	high_expressed_in_wm_score_high	Transcriptional misregulation in cancer	0.00812059
RUNX2	hsa-miR-302b-3p	high_expressed_in_wm_score_high	high_expressed_in_wm_score_high	Transcriptional misregulation in cancer	0.00812059
RUNX2	hsa-miR-302a-3p	high_expressed_in_wm_score_high	high_expressed_in_wm_score_high	Transcriptional misregulation in cancer	0.00812059
RUNX2	hsa-miR-520e	high_expressed_in_wm_score_high	high_expressed_in_wm_score_high	Transcriptional misregulation in cancer	0.00812059
RUNX2	hsa-miR-302d-3p	high_expressed_in_wm_score_high	high_expressed_in_wm_score_high	Transcriptional misregulation in cancer	0.00812059
RUNX2	hsa-miR-520d-3p	high_expressed_in_wm_score_high	high_expressed_in_wm_score_high	Transcriptional misregulation in cancer	0.00812059
RUNX2	hsa-miR-302a-3p	high_expressed_in_wm_score_high	high_expressed_in_wm_score_high	Transcriptional misregulation in cancer	0.00812059
RUNX2	hsa-miR-302b-3p	high_expressed_in_wm_score_high	high_expressed_in_wm_score_high	Transcriptional misregulation in cancer	0.00812059
RUNX2	hsa-miR-302d-3p	high_expressed_in_wm_score_high	high_expressed_in_wm_score_high	Transcriptional misregulation in cancer	0.00812059
RUNX2	hsa-miR-520e	high_expressed_in_wm_score_high	high_expressed_in_wm_score_high	Transcriptional misregulation in cancer	0.00812059
RUNX2	hsa-miR-373-3p	high_expressed_in_wm_score_high	high_expressed_in_wm_score_high	Transcriptional misregulation in cancer	0.00812059
RUNX2	hsa-miR-302c-3p.1	high_expressed_in_wm_score_high	high_expressed_in_wm_score_high	Transcriptional misregulation in cancer	0.00812059
RYK	hsa-miR-371a-5p	high_expressed_in_wm_score_high	high_expressed_in_wm_score_high	Axon guidance	0.0170671
SAR1B	hsa-miR-373-3p	high_expressed_in_wm_score_high	low_expressed_in_wm_score_high	Protein processing in endoplasmic reticulum	0.0170927
SAR1B	hsa-miR-302d-3p	high_expressed_in_wm_score_high	low_expressed_in_wm_score_high	Protein processing in endoplasmic reticulum	0.0170927
SAR1B	hsa-miR-302c-3p.1	high_expressed_in_wm_score_high	low_expressed_in_wm_score_high	Protein processing in endoplasmic reticulum	0.0170927
SAR1B	hsa-miR-520e	high_expressed_in_wm_score_high	low_expressed_in_wm_score_high	Protein processing in endoplasmic reticulum	0.0170927
SAR1B	hsa-miR-520d-3p	high_expressed_in_wm_score_high	low_expressed_in_wm_score_high	Protein processing in endoplasmic reticulum	0.0170927
SAR1B	hsa-miR-302a-3p	high_expressed_in_wm_score_high	low_expressed_in_wm_score_high	Protein processing in endoplasmic reticulum	0.0170927
SAR1B	hsa-miR-302b-3p	high_expressed_in_wm_score_high	low_expressed_in_wm_score_high	Protein processing in endoplasmic reticulum	0.0170927
SDC1	hsa-miR-520d-3p	high_expressed_in_wm_score_high	low_expressed_in_wm_score_high	Proteoglycans in cancer	0.000378895
SDC1	hsa-miR-302a-3p	high_expressed_in_wm_score_high	low_expressed_in_wm_score_high	Proteoglycans in cancer	0.000378895
SDC1	hsa-miR-302b-3p	high_expressed_in_wm_score_high	low_expressed_in_wm_score_high	Proteoglycans in cancer	0.000378895
SDC1	hsa-miR-302c-3p.1	high_expressed_in_wm_score_high	low_expressed_in_wm_score_high	Proteoglycans in cancer	0.000378895
SDC1	hsa-miR-302d-3p	high_expressed_in_wm_score_high	low_expressed_in_wm_score_high	Proteoglycans in cancer	0.000378895
SDC1	hsa-miR-373-3p	high_expressed_in_wm_score_high	low_expressed_in_wm_score_high	Proteoglycans in cancer	0.000378895
SDC1	hsa-miR-520e	high_expressed_in_wm_score_high	low_expressed_in_wm_score_high	Proteoglycans in cancer	0.000378895
SDC2	hsa-miR-371a-5p	high_expressed_in_wm_score_high	low_expressed_in_wm_score_high	Proteoglycans in cancer	0.000378895
SEC23A	hsa-miR-371a-5p	high_expressed_in_wm_score_high	low_expressed_in_wm_score_high	Protein processing in endoplasmic reticulum	0.0170927
SEC62	hsa-miR-520e	high_expressed_in_wm_score_high	low_expressed_in_wm_score_high	Protein processing in endoplasmic reticulum	0.0170927
SEC62	hsa-miR-520d-3p	high_expressed_in_wm_score_high	low_expressed_in_wm_score_high	Protein processing in endoplasmic reticulum	0.0170927
SEC62	hsa-miR-373-3p	high_expressed_in_wm_score_high	low_expressed_in_wm_score_high	Protein processing in endoplasmic reticulum	0.0170927
SEC62	hsa-miR-302a-3p	high_expressed_in_wm_score_high	low_expressed_in_wm_score_high	Protein processing in endoplasmic reticulum	0.0170927
SEC62	hsa-miR-302c-3p.1	high_expressed_in_wm_score_high	low_expressed_in_wm_score_high	Protein processing in endoplasmic reticulum	0.0170927
SEC62	hsa-miR-302b-3p	high_expressed_in_wm_score_high	low_expressed_in_wm_score_high	Protein processing in endoplasmic reticulum	0.0170927
SEC62	hsa-miR-302d-3p	high_expressed_in_wm_score_high	low_expressed_in_wm_score_high	Protein processing in endoplasmic reticulum	0.0170927
SHH	hsa-miR-371a-5p	high_expressed_in_wm_score_high	low_expressed_in_wm_score_high	Basal cell carcinoma	0.0392676
SKP1	hsa-miR-371a-5p	high_expressed_in_wm_score_high	low_expressed_in_wm_score_high	Protein processing in endoplasmic reticulum	0.0170927
SLC7A1	hsa-miR-371a-5p	high_expressed_in_wm_score_high	high_expressed_in_wm_score_high	MicroRNAs in cancer	0.00421714
SLK	hsa-miR-520e	high_expressed_in_wm_score_high	high_expressed_in_wm_score_high	Oocyte meiosis	0.00947978
SLK	hsa-miR-520d-3p	high_expressed_in_wm_score_high	high_expressed_in_wm_score_high	Oocyte meiosis	0.00947978
SLK	hsa-miR-302c-3p.1	high_expressed_in_wm_score_high	high_expressed_in_wm_score_high	Oocyte meiosis	0.00947978
SLK	hsa-miR-302a-3p	high_expressed_in_wm_score_high	high_expressed_in_wm_score_high	Oocyte meiosis	0.00947978
SLK	hsa-miR-302b-3p	high_expressed_in_wm_score_high	high_expressed_in_wm_score_high	Oocyte meiosis	0.00947978
SLK	hsa-miR-302d-3p	high_expressed_in_wm_score_high	high_expressed_in_wm_score_high	Oocyte meiosis	0.00947978
SLK	hsa-miR-373-3p	high_expressed_in_wm_score_high	high_expressed_in_wm_score_high	Oocyte meiosis	0.00947978
SMAD2	hsa-miR-373-3p	high_expressed_in_wm_score_high	high_expressed_in_wm_score_high	Human T-cell leukemia virus 1 infection	0.0175415
SMAD2	hsa-miR-302a-3p	high_expressed_in_wm_score_high	high_expressed_in_wm_score_high	Human T-cell leukemia virus 1 infection	0.0175415
SMAD2	hsa-miR-302d-3p	high_expressed_in_wm_score_high	high_expressed_in_wm_score_high	Human T-cell leukemia virus 1 infection	0.0175415
SMAD2	hsa-miR-302c-3p.1	high_expressed_in_wm_score_high	high_expressed_in_wm_score_high	Human T-cell leukemia virus 1 infection	0.0175415
SMAD2	hsa-miR-302b-3p	high_expressed_in_wm_score_high	high_expressed_in_wm_score_high	Human T-cell leukemia virus 1 infection	0.0175415
SMAD2	hsa-miR-520d-3p	high_expressed_in_wm_score_high	high_expressed_in_wm_score_high	Human T-cell leukemia virus 1 infection	0.0175415
SMAD2	hsa-miR-520e	high_expressed_in_wm_score_high	high_expressed_in_wm_score_high	Human T-cell leukemia virus 1 infection	0.0175415
SMAD7	hsa-miR-371a-5p	high_expressed_in_wm_score_high	high_expressed_in_wm_score_high	Hippo signaling pathway	0.00273368
SMARCC2	hsa-miR-302a-3p	high_expressed_in_wm_score_high	high_expressed_in_wm_score_high	Hepatocellular carcinoma	0.0146201
SMARCC2	hsa-miR-302c-3p.1	high_expressed_in_wm_score_high	high_expressed_in_wm_score_high	Hepatocellular carcinoma	0.0146201
SMARCC2	hsa-miR-302b-3p	high_expressed_in_wm_score_high	high_expressed_in_wm_score_high	Hepatocellular carcinoma	0.0146201
SMARCC2	hsa-miR-302d-3p	high_expressed_in_wm_score_high	high_expressed_in_wm_score_high	Hepatocellular carcinoma	0.0146201
SMARCC2	hsa-miR-373-3p	high_expressed_in_wm_score_high	high_expressed_in_wm_score_high	Hepatocellular carcinoma	0.0146201
SMARCC2	hsa-miR-520d-3p	high_expressed_in_wm_score_high	high_expressed_in_wm_score_high	Hepatocellular carcinoma	0.0146201
SMARCC2	hsa-miR-520e	high_expressed_in_wm_score_high	high_expressed_in_wm_score_high	Hepatocellular carcinoma	0.0146201
SOX2	hsa-miR-371a-5p	high_expressed_in_wm_score_high	low_expressed_in_wm_score_high	Hippo signaling pathway	0.00273368
SOX4	hsa-miR-371a-5p	high_expressed_in_wm_score_high	high_expressed_in_wm_score_high	MicroRNAs in cancer	0.00421714
SPOP	hsa-miR-302a-3p	high_expressed_in_wm_score_high	low_expressed_in_wm_score_high	Hedgehog signaling pathway	0.0175415
SPOP	hsa-miR-520d-3p	high_expressed_in_wm_score_high	low_expressed_in_wm_score_high	Hedgehog signaling pathway	0.0175415
SPOP	hsa-miR-302c-3p.1	high_expressed_in_wm_score_high	low_expressed_in_wm_score_high	Hedgehog signaling pathway	0.0175415
SPOP	hsa-miR-373-3p	high_expressed_in_wm_score_high	low_expressed_in_wm_score_high	Hedgehog signaling pathway	0.0175415
SPOP	hsa-miR-302d-3p	high_expressed_in_wm_score_high	low_expressed_in_wm_score_high	Hedgehog signaling pathway	0.0175415
SPOP	hsa-miR-302b-3p	high_expressed_in_wm_score_high	low_expressed_in_wm_score_high	Hedgehog signaling pathway	0.0175415
SPOP	hsa-miR-520e	high_expressed_in_wm_score_high	low_expressed_in_wm_score_high	Hedgehog signaling pathway	0.0175415
SPOPL	hsa-miR-373-3p	high_expressed_in_wm_score_high	high_expressed_in_wm_score_high	Hedgehog signaling pathway	0.0175415
SPOPL	hsa-miR-302d-3p	high_expressed_in_wm_score_high	high_expressed_in_wm_score_high	Hedgehog signaling pathway	0.0175415
SPOPL	hsa-miR-520e	high_expressed_in_wm_score_high	high_expressed_in_wm_score_high	Hedgehog signaling pathway	0.0175415
SPOPL	hsa-miR-520d-3p	high_expressed_in_wm_score_high	high_expressed_in_wm_score_high	Hedgehog signaling pathway	0.0175415
SPOPL	hsa-miR-302c-3p.1	high_expressed_in_wm_score_high	high_expressed_in_wm_score_high	Hedgehog signaling pathway	0.0175415
SPOPL	hsa-miR-302b-3p	high_expressed_in_wm_score_high	high_expressed_in_wm_score_high	Hedgehog signaling pathway	0.0175415
SPOPL	hsa-miR-302a-3p	high_expressed_in_wm_score_high	high_expressed_in_wm_score_high	Hedgehog signaling pathway	0.0175415
SQSTM1	hsa-miR-520d-3p	high_expressed_in_wm_score_high	high_expressed_in_wm_score_high	Cellular senescence	0.00471919
SQSTM1	hsa-miR-520e	high_expressed_in_wm_score_high	high_expressed_in_wm_score_high	Cellular senescence	0.00471919
SQSTM1	hsa-miR-302b-3p	high_expressed_in_wm_score_high	high_expressed_in_wm_score_high	Cellular senescence	0.00471919
SQSTM1	hsa-miR-373-3p	high_expressed_in_wm_score_high	high_expressed_in_wm_score_high	Cellular senescence	0.00471919
SQSTM1	hsa-miR-302d-3p	high_expressed_in_wm_score_high	high_expressed_in_wm_score_high	Cellular senescence	0.00471919
SQSTM1	hsa-miR-302a-3p	high_expressed_in_wm_score_high	high_expressed_in_wm_score_high	Cellular senescence	0.00471919
SQSTM1	hsa-miR-302c-3p.1	high_expressed_in_wm_score_high	high_expressed_in_wm_score_high	Cellular senescence	0.00471919
STAT3	hsa-miR-371a-5p	high_expressed_in_wm_score_high	low_expressed_in_wm_score_high	MicroRNAs in cancer	0.00421714
SUFU	hsa-miR-371a-5p	high_expressed_in_wm_score_high	high_expressed_in_wm_score_high	Basal cell carcinoma	0.0392676
TAOK1	hsa-miR-520e	high_expressed_in_wm_score_high	high_expressed_in_wm_score_high	MAPK signaling pathway	0.00349373
TAOK1	hsa-miR-373-3p	high_expressed_in_wm_score_high	high_expressed_in_wm_score_high	MAPK signaling pathway	0.00349373
TAOK1	hsa-miR-302b-3p	high_expressed_in_wm_score_high	high_expressed_in_wm_score_high	MAPK signaling pathway	0.00349373
TAOK1	hsa-miR-302c-3p.1	high_expressed_in_wm_score_high	high_expressed_in_wm_score_high	MAPK signaling pathway	0.00349373
TAOK1	hsa-miR-520d-3p	high_expressed_in_wm_score_high	high_expressed_in_wm_score_high	MAPK signaling pathway	0.00349373
TAOK1	hsa-miR-302d-3p	high_expressed_in_wm_score_high	high_expressed_in_wm_score_high	MAPK signaling pathway	0.00349373
TAOK1	hsa-miR-302a-3p	high_expressed_in_wm_score_high	high_expressed_in_wm_score_high	MAPK signaling pathway	0.00349373
TAOK2	hsa-miR-302c-3p.1	high_expressed_in_wm_score_high	low_expressed_in_wm_score_high	MAPK signaling pathway	0.00349373
TAOK2	hsa-miR-302b-3p	high_expressed_in_wm_score_high	low_expressed_in_wm_score_high	MAPK signaling pathway	0.00349373
TAOK2	hsa-miR-302a-3p	high_expressed_in_wm_score_high	low_expressed_in_wm_score_high	MAPK signaling pathway	0.00349373
TAOK2	hsa-miR-302d-3p	high_expressed_in_wm_score_high	low_expressed_in_wm_score_high	MAPK signaling pathway	0.00349373
TAOK2	hsa-miR-373-3p	high_expressed_in_wm_score_high	low_expressed_in_wm_score_high	MAPK signaling pathway	0.00349373
TAOK2	hsa-miR-520e	high_expressed_in_wm_score_high	low_expressed_in_wm_score_high	MAPK signaling pathway	0.00349373
TAOK2	hsa-miR-520d-3p	high_expressed_in_wm_score_high	low_expressed_in_wm_score_high	MAPK signaling pathway	0.00349373
TCF7L1	hsa-miR-302d-3p	high_expressed_in_wm_score_high	high_expressed_in_wm_score_high	Basal cell carcinoma	0.0392676
TCF7L1	hsa-miR-520e	high_expressed_in_wm_score_high	high_expressed_in_wm_score_high	Basal cell carcinoma	0.0392676
TCF7L1	hsa-miR-520d-3p	high_expressed_in_wm_score_high	high_expressed_in_wm_score_high	Basal cell carcinoma	0.0392676
TCF7L1	hsa-miR-302a-3p	high_expressed_in_wm_score_high	high_expressed_in_wm_score_high	Basal cell carcinoma	0.0392676
TCF7L1	hsa-miR-302b-3p	high_expressed_in_wm_score_high	high_expressed_in_wm_score_high	Basal cell carcinoma	0.0392676
TCF7L1	hsa-miR-302c-3p.1	high_expressed_in_wm_score_high	high_expressed_in_wm_score_high	Basal cell carcinoma	0.0392676
TCF7L1	hsa-miR-373-3p	high_expressed_in_wm_score_high	high_expressed_in_wm_score_high	Basal cell carcinoma	0.0392676
TEAD1	hsa-miR-371a-5p	high_expressed_in_wm_score_high	low_expressed_in_wm_score_high	Hippo signaling pathway	0.00273368
TEAD1	hsa-miR-371a-5p	high_expressed_in_wm_score_high	low_expressed_in_wm_score_high	Hippo signaling pathway	0.00273368
TFAP4	hsa-miR-520e	high_expressed_in_wm_score_high	high_expressed_in_wm_score_high	Proteoglycans in cancer	0.000378895
TFAP4	hsa-miR-520d-3p	high_expressed_in_wm_score_high	high_expressed_in_wm_score_high	Proteoglycans in cancer	0.000378895
TFAP4	hsa-miR-302a-3p	high_expressed_in_wm_score_high	high_expressed_in_wm_score_high	Proteoglycans in cancer	0.000378895
TFAP4	hsa-miR-302b-3p	high_expressed_in_wm_score_high	high_expressed_in_wm_score_high	Proteoglycans in cancer	0.000378895
TFAP4	hsa-miR-302c-3p.1	high_expressed_in_wm_score_high	high_expressed_in_wm_score_high	Proteoglycans in cancer	0.000378895
TFAP4	hsa-miR-302d-3p	high_expressed_in_wm_score_high	high_expressed_in_wm_score_high	Proteoglycans in cancer	0.000378895
TFAP4	hsa-miR-373-3p	high_expressed_in_wm_score_high	high_expressed_in_wm_score_high	Proteoglycans in cancer	0.000378895
TGFB2	hsa-miR-371a-5p	high_expressed_in_wm_score_high	high_expressed_in_wm_score_high	Human T-cell leukemia virus 1 infection	0.0175415
TGFBR2	hsa-miR-302a-3p	high_expressed_in_wm_score_high	low_expressed_in_wm_score_high	Human T-cell leukemia virus 1 infection	0.0175415
TGFBR2	hsa-miR-302b-3p	high_expressed_in_wm_score_high	low_expressed_in_wm_score_high	Human T-cell leukemia virus 1 infection	0.0175415
TGFBR2	hsa-miR-302c-3p.1	high_expressed_in_wm_score_high	low_expressed_in_wm_score_high	Human T-cell leukemia virus 1 infection	0.0175415
TGFBR2	hsa-miR-520e	high_expressed_in_wm_score_high	low_expressed_in_wm_score_high	Human T-cell leukemia virus 1 infection	0.0175415
TGFBR2	hsa-miR-520d-3p	high_expressed_in_wm_score_high	low_expressed_in_wm_score_high	Human T-cell leukemia virus 1 infection	0.0175415
TGFBR2	hsa-miR-302d-3p	high_expressed_in_wm_score_high	low_expressed_in_wm_score_high	Human T-cell leukemia virus 1 infection	0.0175415
TGFBR2	hsa-miR-373-3p	high_expressed_in_wm_score_high	low_expressed_in_wm_score_high	Human T-cell leukemia virus 1 infection	0.0175415
TGFBR2	hsa-miR-520d-3p	high_expressed_in_wm_score_high	low_expressed_in_wm_score_high	Human T-cell leukemia virus 1 infection	0.0175415
TGFBR2	hsa-miR-520e	high_expressed_in_wm_score_high	low_expressed_in_wm_score_high	Human T-cell leukemia virus 1 infection	0.0175415
TGFBR2	hsa-miR-302a-3p	high_expressed_in_wm_score_high	low_expressed_in_wm_score_high	Human T-cell leukemia virus 1 infection	0.0175415
TGFBR2	hsa-miR-373-3p	high_expressed_in_wm_score_high	low_expressed_in_wm_score_high	Human T-cell leukemia virus 1 infection	0.0175415
TGFBR2	hsa-miR-302b-3p	high_expressed_in_wm_score_high	low_expressed_in_wm_score_high	Human T-cell leukemia virus 1 infection	0.0175415
TGFBR2	hsa-miR-302c-3p.1	high_expressed_in_wm_score_high	low_expressed_in_wm_score_high	Human T-cell leukemia virus 1 infection	0.0175415
TGFBR2	hsa-miR-302d-3p	high_expressed_in_wm_score_high	low_expressed_in_wm_score_high	Human T-cell leukemia virus 1 infection	0.0175415
TIAM1	hsa-miR-373-3p	high_expressed_in_wm_score_high	low_expressed_in_wm_score_high	Regulation of actin cytoskeleton	0.00700649
TIAM1	hsa-miR-520d-3p	high_expressed_in_wm_score_high	low_expressed_in_wm_score_high	Regulation of actin cytoskeleton	0.00700649
TIAM1	hsa-miR-302d-3p	high_expressed_in_wm_score_high	low_expressed_in_wm_score_high	Regulation of actin cytoskeleton	0.00700649
TIAM1	hsa-miR-302c-3p.1	high_expressed_in_wm_score_high	low_expressed_in_wm_score_high	Regulation of actin cytoskeleton	0.00700649
TIAM1	hsa-miR-302b-3p	high_expressed_in_wm_score_high	low_expressed_in_wm_score_high	Regulation of actin cytoskeleton	0.00700649
TIAM1	hsa-miR-302a-3p	high_expressed_in_wm_score_high	low_expressed_in_wm_score_high	Regulation of actin cytoskeleton	0.00700649
TIAM1	hsa-miR-520e	high_expressed_in_wm_score_high	low_expressed_in_wm_score_high	Regulation of actin cytoskeleton	0.00700649
TIMP3	hsa-miR-520e	high_expressed_in_wm_score_high	low_expressed_in_wm_score_high	MicroRNAs in cancer	0.00421714
TIMP3	hsa-miR-520d-3p	high_expressed_in_wm_score_high	low_expressed_in_wm_score_high	MicroRNAs in cancer	0.00421714
TIMP3	hsa-miR-302d-3p	high_expressed_in_wm_score_high	low_expressed_in_wm_score_high	MicroRNAs in cancer	0.00421714
TIMP3	hsa-miR-302c-3p.1	high_expressed_in_wm_score_high	low_expressed_in_wm_score_high	MicroRNAs in cancer	0.00421714
TIMP3	hsa-miR-302b-3p	high_expressed_in_wm_score_high	low_expressed_in_wm_score_high	MicroRNAs in cancer	0.00421714
TIMP3	hsa-miR-302a-3p	high_expressed_in_wm_score_high	low_expressed_in_wm_score_high	MicroRNAs in cancer	0.00421714
TIMP3	hsa-miR-373-3p	high_expressed_in_wm_score_high	low_expressed_in_wm_score_high	MicroRNAs in cancer	0.00421714
TLE4	hsa-miR-520d-3p	high_expressed_in_wm_score_high	low_expressed_in_wm_score_high	Wnt signaling pathway	0.00759012
TLE4	hsa-miR-302b-3p	high_expressed_in_wm_score_high	low_expressed_in_wm_score_high	Wnt signaling pathway	0.00759012
TLE4	hsa-miR-302c-3p.1	high_expressed_in_wm_score_high	low_expressed_in_wm_score_high	Wnt signaling pathway	0.00759012
TLE4	hsa-miR-302d-3p	high_expressed_in_wm_score_high	low_expressed_in_wm_score_high	Wnt signaling pathway	0.00759012
TLE4	hsa-miR-373-3p	high_expressed_in_wm_score_high	low_expressed_in_wm_score_high	Wnt signaling pathway	0.00759012
TLE4	hsa-miR-520e	high_expressed_in_wm_score_high	low_expressed_in_wm_score_high	Wnt signaling pathway	0.00759012
TLE4	hsa-miR-302a-3p	high_expressed_in_wm_score_high	low_expressed_in_wm_score_high	Wnt signaling pathway	0.00759012
TLR4	hsa-miR-520d-3p	high_expressed_in_wm_score_high	low_expressed_in_wm_score_high	PI3K-Akt signaling pathway	0.00759012
TLR4	hsa-miR-302a-3p	high_expressed_in_wm_score_high	low_expressed_in_wm_score_high	PI3K-Akt signaling pathway	0.00759012
TLR4	hsa-miR-373-3p	high_expressed_in_wm_score_high	low_expressed_in_wm_score_high	PI3K-Akt signaling pathway	0.00759012
TLR4	hsa-miR-302d-3p	high_expressed_in_wm_score_high	low_expressed_in_wm_score_high	PI3K-Akt signaling pathway	0.00759012
TLR4	hsa-miR-302c-3p.1	high_expressed_in_wm_score_high	low_expressed_in_wm_score_high	PI3K-Akt signaling pathway	0.00759012
TLR4	hsa-miR-302b-3p	high_expressed_in_wm_score_high	low_expressed_in_wm_score_high	PI3K-Akt signaling pathway	0.00759012
TLR4	hsa-miR-520e	high_expressed_in_wm_score_high	low_expressed_in_wm_score_high	PI3K-Akt signaling pathway	0.00759012
TLX1	hsa-miR-302b-3p	high_expressed_in_wm_score_high	high_expressed_in_wm_score_high	Transcriptional misregulation in cancer	0.00812059
TLX1	hsa-miR-373-3p	high_expressed_in_wm_score_high	high_expressed_in_wm_score_high	Transcriptional misregulation in cancer	0.00812059
TLX1	hsa-miR-302d-3p	high_expressed_in_wm_score_high	high_expressed_in_wm_score_high	Transcriptional misregulation in cancer	0.00812059
TLX1	hsa-miR-302c-3p.1	high_expressed_in_wm_score_high	high_expressed_in_wm_score_high	Transcriptional misregulation in cancer	0.00812059
TLX1	hsa-miR-302a-3p	high_expressed_in_wm_score_high	high_expressed_in_wm_score_high	Transcriptional misregulation in cancer	0.00812059
TLX1	hsa-miR-520d-3p	high_expressed_in_wm_score_high	high_expressed_in_wm_score_high	Transcriptional misregulation in cancer	0.00812059
TLX1	hsa-miR-520e	high_expressed_in_wm_score_high	high_expressed_in_wm_score_high	Transcriptional misregulation in cancer	0.00812059
TNR	hsa-miR-302b-3p	high_expressed_in_wm_score_high	low_expressed_in_wm_score_high	Focal adhesion	0.00764861
TNR	hsa-miR-302c-3p.1	high_expressed_in_wm_score_high	low_expressed_in_wm_score_high	Focal adhesion	0.00764861
TNR	hsa-miR-520d-3p	high_expressed_in_wm_score_high	low_expressed_in_wm_score_high	Focal adhesion	0.00764861
TNR	hsa-miR-373-3p	high_expressed_in_wm_score_high	low_expressed_in_wm_score_high	Focal adhesion	0.00764861
TNR	hsa-miR-302d-3p	high_expressed_in_wm_score_high	low_expressed_in_wm_score_high	Focal adhesion	0.00764861
TNR	hsa-miR-520e	high_expressed_in_wm_score_high	low_expressed_in_wm_score_high	Focal adhesion	0.00764861
TNR	hsa-miR-302a-3p	high_expressed_in_wm_score_high	low_expressed_in_wm_score_high	Focal adhesion	0.00764861
TP53INP2	hsa-miR-302c-3p.1	high_expressed_in_wm_score_high	low_expressed_in_wm_score_high	Autophagy - animal	0.00122306
TP53INP2	hsa-miR-302d-3p	high_expressed_in_wm_score_high	low_expressed_in_wm_score_high	Autophagy - animal	0.00122306
TP53INP2	hsa-miR-520d-3p	high_expressed_in_wm_score_high	low_expressed_in_wm_score_high	Autophagy - animal	0.00122306
TP53INP2	hsa-miR-373-3p	high_expressed_in_wm_score_high	low_expressed_in_wm_score_high	Autophagy - animal	0.00122306
TP53INP2	hsa-miR-302b-3p	high_expressed_in_wm_score_high	low_expressed_in_wm_score_high	Autophagy - animal	0.00122306
TP53INP2	hsa-miR-302a-3p	high_expressed_in_wm_score_high	low_expressed_in_wm_score_high	Autophagy - animal	0.00122306
TP53INP2	hsa-miR-520e	high_expressed_in_wm_score_high	low_expressed_in_wm_score_high	Autophagy - animal	0.00122306
TP73	hsa-miR-520d-3p	high_expressed_in_wm_score_high	high_expressed_in_wm_score_high	Neurotrophin signaling pathway	0.0096311
TP73	hsa-miR-302a-3p	high_expressed_in_wm_score_high	high_expressed_in_wm_score_high	Neurotrophin signaling pathway	0.0096311
TP73	hsa-miR-520e	high_expressed_in_wm_score_high	high_expressed_in_wm_score_high	Neurotrophin signaling pathway	0.0096311
TP73	hsa-miR-302b-3p	high_expressed_in_wm_score_high	high_expressed_in_wm_score_high	Neurotrophin signaling pathway	0.0096311
TP73	hsa-miR-302c-3p.1	high_expressed_in_wm_score_high	high_expressed_in_wm_score_high	Neurotrophin signaling pathway	0.0096311
TP73	hsa-miR-302d-3p	high_expressed_in_wm_score_high	high_expressed_in_wm_score_high	Neurotrophin signaling pathway	0.0096311
TP73	hsa-miR-373-3p	high_expressed_in_wm_score_high	high_expressed_in_wm_score_high	Neurotrophin signaling pathway	0.0096311
TRIM71	hsa-miR-520d-3p	high_expressed_in_wm_score_high	high_expressed_in_wm_score_high	MicroRNAs in cancer	0.00421714
TRIM71	hsa-miR-302a-3p	high_expressed_in_wm_score_high	high_expressed_in_wm_score_high	MicroRNAs in cancer	0.00421714
TRIM71	hsa-miR-520e	high_expressed_in_wm_score_high	high_expressed_in_wm_score_high	MicroRNAs in cancer	0.00421714
TRIM71	hsa-miR-373-3p	high_expressed_in_wm_score_high	high_expressed_in_wm_score_high	MicroRNAs in cancer	0.00421714
TRIM71	hsa-miR-302b-3p	high_expressed_in_wm_score_high	high_expressed_in_wm_score_high	MicroRNAs in cancer	0.00421714
TRIM71	hsa-miR-302c-3p.1	high_expressed_in_wm_score_high	high_expressed_in_wm_score_high	MicroRNAs in cancer	0.00421714
TRIM71	hsa-miR-302d-3p	high_expressed_in_wm_score_high	high_expressed_in_wm_score_high	MicroRNAs in cancer	0.00421714
UBE2G1	hsa-miR-371a-5p	high_expressed_in_wm_score_high	low_expressed_in_wm_score_high	Protein processing in endoplasmic reticulum	0.0170927
UBE2J1	hsa-miR-520d-3p	high_expressed_in_wm_score_high	low_expressed_in_wm_score_high	Protein processing in endoplasmic reticulum	0.0170927
UBE2J1	hsa-miR-520e	high_expressed_in_wm_score_high	low_expressed_in_wm_score_high	Protein processing in endoplasmic reticulum	0.0170927
UBE2J1	hsa-miR-302d-3p	high_expressed_in_wm_score_high	low_expressed_in_wm_score_high	Protein processing in endoplasmic reticulum	0.0170927
UBE2J1	hsa-miR-302c-3p.1	high_expressed_in_wm_score_high	low_expressed_in_wm_score_high	Protein processing in endoplasmic reticulum	0.0170927
UBE2J1	hsa-miR-373-3p	high_expressed_in_wm_score_high	low_expressed_in_wm_score_high	Protein processing in endoplasmic reticulum	0.0170927
UBE2J1	hsa-miR-302b-3p	high_expressed_in_wm_score_high	low_expressed_in_wm_score_high	Protein processing in endoplasmic reticulum	0.0170927
UBE2J1	hsa-miR-302a-3p	high_expressed_in_wm_score_high	low_expressed_in_wm_score_high	Protein processing in endoplasmic reticulum	0.0170927
UBE2J1	hsa-miR-371a-5p	high_expressed_in_wm_score_high	low_expressed_in_wm_score_high	Protein processing in endoplasmic reticulum	0.0170927
UBE3A	hsa-miR-373-3p	high_expressed_in_wm_score_high	low_expressed_in_wm_score_high	Human papillomavirus infection	0.00764861
UBE3A	hsa-miR-302d-3p	high_expressed_in_wm_score_high	low_expressed_in_wm_score_high	Human papillomavirus infection	0.00764861
UBE3A	hsa-miR-302c-3p.1	high_expressed_in_wm_score_high	low_expressed_in_wm_score_high	Human papillomavirus infection	0.00764861
UBE3A	hsa-miR-302b-3p	high_expressed_in_wm_score_high	low_expressed_in_wm_score_high	Human papillomavirus infection	0.00764861
UBE3A	hsa-miR-302a-3p	high_expressed_in_wm_score_high	low_expressed_in_wm_score_high	Human papillomavirus infection	0.00764861
UBE3A	hsa-miR-520d-3p	high_expressed_in_wm_score_high	low_expressed_in_wm_score_high	Human papillomavirus infection	0.00764861
UBE3A	hsa-miR-520e	high_expressed_in_wm_score_high	low_expressed_in_wm_score_high	Human papillomavirus infection	0.00764861
ULK1	hsa-miR-520e	high_expressed_in_wm_score_high	low_expressed_in_wm_score_high	Autophagy - animal	0.00122306
ULK1	hsa-miR-373-3p	high_expressed_in_wm_score_high	low_expressed_in_wm_score_high	Autophagy - animal	0.00122306
ULK1	hsa-miR-520d-3p	high_expressed_in_wm_score_high	low_expressed_in_wm_score_high	Autophagy - animal	0.00122306
ULK1	hsa-miR-302d-3p	high_expressed_in_wm_score_high	low_expressed_in_wm_score_high	Autophagy - animal	0.00122306
ULK1	hsa-miR-302b-3p	high_expressed_in_wm_score_high	low_expressed_in_wm_score_high	Autophagy - animal	0.00122306
ULK1	hsa-miR-302c-3p.1	high_expressed_in_wm_score_high	low_expressed_in_wm_score_high	Autophagy - animal	0.00122306
ULK1	hsa-miR-302a-3p	high_expressed_in_wm_score_high	low_expressed_in_wm_score_high	Autophagy - animal	0.00122306
UVRAG	hsa-miR-520d-3p	high_expressed_in_wm_score_high	low_expressed_in_wm_score_high	Autophagy - animal	0.00122306
UVRAG	hsa-miR-520e	high_expressed_in_wm_score_high	low_expressed_in_wm_score_high	Autophagy - animal	0.00122306
UVRAG	hsa-miR-373-3p	high_expressed_in_wm_score_high	low_expressed_in_wm_score_high	Autophagy - animal	0.00122306
UVRAG	hsa-miR-302b-3p	high_expressed_in_wm_score_high	low_expressed_in_wm_score_high	Autophagy - animal	0.00122306
UVRAG	hsa-miR-302c-3p.1	high_expressed_in_wm_score_high	low_expressed_in_wm_score_high	Autophagy - animal	0.00122306
UVRAG	hsa-miR-302d-3p	high_expressed_in_wm_score_high	low_expressed_in_wm_score_high	Autophagy - animal	0.00122306
UVRAG	hsa-miR-302a-3p	high_expressed_in_wm_score_high	low_expressed_in_wm_score_high	Autophagy - animal	0.00122306
UVRAG	hsa-miR-371a-5p	high_expressed_in_wm_score_high	low_expressed_in_wm_score_high	Autophagy - animal	0.00122306
VEGFA	hsa-miR-373-3p	high_expressed_in_wm_score_high	high_expressed_in_wm_score_high	Bladder cancer	0.0259407
VEGFA	hsa-miR-520d-3p	high_expressed_in_wm_score_high	high_expressed_in_wm_score_high	Bladder cancer	0.0259407
VEGFA	hsa-miR-520e	high_expressed_in_wm_score_high	high_expressed_in_wm_score_high	Bladder cancer	0.0259407
VEGFA	hsa-miR-302d-3p	high_expressed_in_wm_score_high	high_expressed_in_wm_score_high	Bladder cancer	0.0259407
VEGFA	hsa-miR-302c-3p.1	high_expressed_in_wm_score_high	high_expressed_in_wm_score_high	Bladder cancer	0.0259407
VEGFA	hsa-miR-302a-3p	high_expressed_in_wm_score_high	high_expressed_in_wm_score_high	Bladder cancer	0.0259407
VEGFA	hsa-miR-302b-3p	high_expressed_in_wm_score_high	high_expressed_in_wm_score_high	Bladder cancer	0.0259407
VMP1	hsa-miR-371a-5p	high_expressed_in_wm_score_high	high_expressed_in_wm_score_high	Autophagy - animal	0.00122306
WEE1	hsa-miR-520e	high_expressed_in_wm_score_high	high_expressed_in_wm_score_high	Cell cycle	0.000545759
WEE1	hsa-miR-302a-3p	high_expressed_in_wm_score_high	high_expressed_in_wm_score_high	Cell cycle	0.000545759
WEE1	hsa-miR-302b-3p	high_expressed_in_wm_score_high	high_expressed_in_wm_score_high	Cell cycle	0.000545759
WEE1	hsa-miR-302c-3p.1	high_expressed_in_wm_score_high	high_expressed_in_wm_score_high	Cell cycle	0.000545759
WEE1	hsa-miR-302d-3p	high_expressed_in_wm_score_high	high_expressed_in_wm_score_high	Cell cycle	0.000545759
WEE1	hsa-miR-373-3p	high_expressed_in_wm_score_high	high_expressed_in_wm_score_high	Cell cycle	0.000545759
WEE1	hsa-miR-520d-3p	high_expressed_in_wm_score_high	high_expressed_in_wm_score_high	Cell cycle	0.000545759
WFS1	hsa-miR-302a-3p	high_expressed_in_wm_score_high	low_expressed_in_wm_score_high	Protein processing in endoplasmic reticulum	0.0170927
WFS1	hsa-miR-302d-3p	high_expressed_in_wm_score_high	low_expressed_in_wm_score_high	Protein processing in endoplasmic reticulum	0.0170927
WFS1	hsa-miR-302b-3p	high_expressed_in_wm_score_high	low_expressed_in_wm_score_high	Protein processing in endoplasmic reticulum	0.0170927
WFS1	hsa-miR-302c-3p.1	high_expressed_in_wm_score_high	low_expressed_in_wm_score_high	Protein processing in endoplasmic reticulum	0.0170927
WFS1	hsa-miR-520e	high_expressed_in_wm_score_high	low_expressed_in_wm_score_high	Protein processing in endoplasmic reticulum	0.0170927
WFS1	hsa-miR-373-3p	high_expressed_in_wm_score_high	low_expressed_in_wm_score_high	Protein processing in endoplasmic reticulum	0.0170927
WFS1	hsa-miR-520d-3p	high_expressed_in_wm_score_high	low_expressed_in_wm_score_high	Protein processing in endoplasmic reticulum	0.0170927
WNT9A	hsa-miR-520e	high_expressed_in_wm_score_high	high_expressed_in_wm_score_high	Basal cell carcinoma	0.0392676
WNT9A	hsa-miR-520d-3p	high_expressed_in_wm_score_high	high_expressed_in_wm_score_high	Basal cell carcinoma	0.0392676
WNT9A	hsa-miR-373-3p	high_expressed_in_wm_score_high	high_expressed_in_wm_score_high	Basal cell carcinoma	0.0392676
WNT9A	hsa-miR-302d-3p	high_expressed_in_wm_score_high	high_expressed_in_wm_score_high	Basal cell carcinoma	0.0392676
WNT9A	hsa-miR-302c-3p.1	high_expressed_in_wm_score_high	high_expressed_in_wm_score_high	Basal cell carcinoma	0.0392676
WNT9A	hsa-miR-302b-3p	high_expressed_in_wm_score_high	high_expressed_in_wm_score_high	Basal cell carcinoma	0.0392676
WNT9A	hsa-miR-302a-3p	high_expressed_in_wm_score_high	high_expressed_in_wm_score_high	Basal cell carcinoma	0.0392676
WNT9B	hsa-miR-373-3p	high_expressed_in_wm_score_high	high_expressed_in_wm_score_high	Basal cell carcinoma	0.0392676
WNT9B	hsa-miR-302d-3p	high_expressed_in_wm_score_high	high_expressed_in_wm_score_high	Basal cell carcinoma	0.0392676
WNT9B	hsa-miR-302c-3p.1	high_expressed_in_wm_score_high	high_expressed_in_wm_score_high	Basal cell carcinoma	0.0392676
WNT9B	hsa-miR-302b-3p	high_expressed_in_wm_score_high	high_expressed_in_wm_score_high	Basal cell carcinoma	0.0392676
WNT9B	hsa-miR-302a-3p	high_expressed_in_wm_score_high	high_expressed_in_wm_score_high	Basal cell carcinoma	0.0392676
WNT9B	hsa-miR-520d-3p	high_expressed_in_wm_score_high	high_expressed_in_wm_score_high	Basal cell carcinoma	0.0392676
WNT9B	hsa-miR-520e	high_expressed_in_wm_score_high	high_expressed_in_wm_score_high	Basal cell carcinoma	0.0392676
XIAP	hsa-miR-371a-5p	high_expressed_in_wm_score_high	low_expressed_in_wm_score_high	Human T-cell leukemia virus 1 infection	0.0175415
XIAP	hsa-miR-371a-5p	high_expressed_in_wm_score_high	low_expressed_in_wm_score_high	Human T-cell leukemia virus 1 infection	0.0175415
YOD1	hsa-miR-302b-3p	high_expressed_in_wm_score_high	high_expressed_in_wm_score_high	Protein processing in endoplasmic reticulum	0.0170927
YOD1	hsa-miR-302c-3p.1	high_expressed_in_wm_score_high	high_expressed_in_wm_score_high	Protein processing in endoplasmic reticulum	0.0170927
YOD1	hsa-miR-520d-3p	high_expressed_in_wm_score_high	high_expressed_in_wm_score_high	Protein processing in endoplasmic reticulum	0.0170927
YOD1	hsa-miR-302a-3p	high_expressed_in_wm_score_high	high_expressed_in_wm_score_high	Protein processing in endoplasmic reticulum	0.0170927
YOD1	hsa-miR-373-3p	high_expressed_in_wm_score_high	high_expressed_in_wm_score_high	Protein processing in endoplasmic reticulum	0.0170927
YOD1	hsa-miR-520e	high_expressed_in_wm_score_high	high_expressed_in_wm_score_high	Protein processing in endoplasmic reticulum	0.0170927
YOD1	hsa-miR-302d-3p	high_expressed_in_wm_score_high	high_expressed_in_wm_score_high	Protein processing in endoplasmic reticulum	0.0170927
YOD1	hsa-miR-302b-3p	high_expressed_in_wm_score_high	high_expressed_in_wm_score_high	Protein processing in endoplasmic reticulum	0.0170927
YOD1	hsa-miR-302a-3p	high_expressed_in_wm_score_high	high_expressed_in_wm_score_high	Protein processing in endoplasmic reticulum	0.0170927
YOD1	hsa-miR-520e	high_expressed_in_wm_score_high	high_expressed_in_wm_score_high	Protein processing in endoplasmic reticulum	0.0170927
YOD1	hsa-miR-302c-3p.1	high_expressed_in_wm_score_high	high_expressed_in_wm_score_high	Protein processing in endoplasmic reticulum	0.0170927
YOD1	hsa-miR-520d-3p	high_expressed_in_wm_score_high	high_expressed_in_wm_score_high	Protein processing in endoplasmic reticulum	0.0170927
YOD1	hsa-miR-302d-3p	high_expressed_in_wm_score_high	high_expressed_in_wm_score_high	Protein processing in endoplasmic reticulum	0.0170927
YOD1	hsa-miR-373-3p	high_expressed_in_wm_score_high	high_expressed_in_wm_score_high	Protein processing in endoplasmic reticulum	0.0170927
YOD1	hsa-miR-302b-3p	high_expressed_in_wm_score_high	high_expressed_in_wm_score_high	Protein processing in endoplasmic reticulum	0.0170927
YOD1	hsa-miR-302a-3p	high_expressed_in_wm_score_high	high_expressed_in_wm_score_high	Protein processing in endoplasmic reticulum	0.0170927
YOD1	hsa-miR-520e	high_expressed_in_wm_score_high	high_expressed_in_wm_score_high	Protein processing in endoplasmic reticulum	0.0170927
YOD1	hsa-miR-302d-3p	high_expressed_in_wm_score_high	high_expressed_in_wm_score_high	Protein processing in endoplasmic reticulum	0.0170927
YOD1	hsa-miR-520d-3p	high_expressed_in_wm_score_high	high_expressed_in_wm_score_high	Protein processing in endoplasmic reticulum	0.0170927
YOD1	hsa-miR-302c-3p.1	high_expressed_in_wm_score_high	high_expressed_in_wm_score_high	Protein processing in endoplasmic reticulum	0.0170927
YOD1	hsa-miR-373-3p	high_expressed_in_wm_score_high	high_expressed_in_wm_score_high	Protein processing in endoplasmic reticulum	0.0170927
YWHAZ	hsa-miR-373-3p	high_expressed_in_wm_score_high	high_expressed_in_wm_score_high	Oocyte meiosis	0.00947978
YWHAZ	hsa-miR-520d-3p	high_expressed_in_wm_score_high	high_expressed_in_wm_score_high	Oocyte meiosis	0.00947978
YWHAZ	hsa-miR-520e	high_expressed_in_wm_score_high	high_expressed_in_wm_score_high	Oocyte meiosis	0.00947978
YWHAZ	hsa-miR-302d-3p	high_expressed_in_wm_score_high	high_expressed_in_wm_score_high	Oocyte meiosis	0.00947978
YWHAZ	hsa-miR-302c-3p.1	high_expressed_in_wm_score_high	high_expressed_in_wm_score_high	Oocyte meiosis	0.00947978
YWHAZ	hsa-miR-302a-3p	high_expressed_in_wm_score_high	high_expressed_in_wm_score_high	Oocyte meiosis	0.00947978
YWHAZ	hsa-miR-302b-3p	high_expressed_in_wm_score_high	high_expressed_in_wm_score_high	Oocyte meiosis	0.00947978
ZFHX3	hsa-miR-371a-5p	high_expressed_in_wm_score_high	high_expressed_in_wm_score_high	Signaling pathways regulating pluripotency of stem cells	0.00108506
ZFP36L2	hsa-miR-302a-3p	high_expressed_in_wm_score_high	high_expressed_in_wm_score_high	Cellular senescence	0.00471919
ZFP36L2	hsa-miR-302b-3p	high_expressed_in_wm_score_high	high_expressed_in_wm_score_high	Cellular senescence	0.00471919
ZFP36L2	hsa-miR-302d-3p	high_expressed_in_wm_score_high	high_expressed_in_wm_score_high	Cellular senescence	0.00471919
ZFP36L2	hsa-miR-520e	high_expressed_in_wm_score_high	high_expressed_in_wm_score_high	Cellular senescence	0.00471919
ZFP36L2	hsa-miR-520d-3p	high_expressed_in_wm_score_high	high_expressed_in_wm_score_high	Cellular senescence	0.00471919
ZFP36L2	hsa-miR-373-3p	high_expressed_in_wm_score_high	high_expressed_in_wm_score_high	Cellular senescence	0.00471919
ZFP36L2	hsa-miR-302c-3p.1	high_expressed_in_wm_score_high	high_expressed_in_wm_score_high	Cellular senescence	0.00471919
ZFP36L2	hsa-miR-371a-5p	high_expressed_in_wm_score_high	high_expressed_in_wm_score_high	Cellular senescence	0.00471919
ZFPM2	hsa-miR-520e	high_expressed_in_wm_score_high	low_expressed_in_wm_score_high	MicroRNAs in cancer	0.00421714
ZFPM2	hsa-miR-520d-3p	high_expressed_in_wm_score_high	low_expressed_in_wm_score_high	MicroRNAs in cancer	0.00421714
ZFPM2	hsa-miR-302c-3p.1	high_expressed_in_wm_score_high	low_expressed_in_wm_score_high	MicroRNAs in cancer	0.00421714
ZFPM2	hsa-miR-302a-3p	high_expressed_in_wm_score_high	low_expressed_in_wm_score_high	MicroRNAs in cancer	0.00421714
ZFPM2	hsa-miR-302b-3p	high_expressed_in_wm_score_high	low_expressed_in_wm_score_high	MicroRNAs in cancer	0.00421714
ZFPM2	hsa-miR-302d-3p	high_expressed_in_wm_score_high	low_expressed_in_wm_score_high	MicroRNAs in cancer	0.00421714
ZFPM2	hsa-miR-373-3p	high_expressed_in_wm_score_high	low_expressed_in_wm_score_high	MicroRNAs in cancer	0.00421714
ZNRF3	hsa-miR-373-3p	high_expressed_in_wm_score_high	high_expressed_in_wm_score_high	Wnt signaling pathway	0.00759012
ZNRF3	hsa-miR-302a-3p	high_expressed_in_wm_score_high	high_expressed_in_wm_score_high	Wnt signaling pathway	0.00759012
ZNRF3	hsa-miR-520e	high_expressed_in_wm_score_high	high_expressed_in_wm_score_high	Wnt signaling pathway	0.00759012
ZNRF3	hsa-miR-520d-3p	high_expressed_in_wm_score_high	high_expressed_in_wm_score_high	Wnt signaling pathway	0.00759012
ZNRF3	hsa-miR-302b-3p	high_expressed_in_wm_score_high	high_expressed_in_wm_score_high	Wnt signaling pathway	0.00759012
ZNRF3	hsa-miR-302d-3p	high_expressed_in_wm_score_high	high_expressed_in_wm_score_high	Wnt signaling pathway	0.00759012
ZNRF3	hsa-miR-302c-3p.1	high_expressed_in_wm_score_high	high_expressed_in_wm_score_high	Wnt signaling pathway	0.00759012
